# Supplementary material for: Soluble PD-L1 generated by endogenous retroelement exaptation is a receptor antagonist
Source: eLife. 2019 Nov 15;8:e50256. doi: 10.7554/eLife.50256 (PMC6877088; doi:10.7554/eLife.50256)
Supplement: Figure 1—source data 1. [file elife-50256-fig1-data1.xlsx]

## Sheet: Sheet1
Figure 1G-source data 1 - Expression of CD274 variant 1 and CD274-L2A in TCGA and GTEx samples
sample_ID	Cancer or tissue type	CD274 variant 1 TPMs	CD274-L2A TPMs
db106383-e2dd-43bc-b5a0-a021116eaeca	Cancer_Adrenocortical Carcinoma	0.372181	0.160656
c1d323c4-cd80-4bd6-8a7c-d691dc15a364	Cancer_Adrenocortical Carcinoma	0.0495717	0.151223
01d8a0bd-be57-4c96-8950-3783ce4b8ecc	Cancer_Adrenocortical Carcinoma	0.0584119	0.113136
b1014ce3-95ff-4ef8-8ff5-27f9fb32e787	Cancer_Adrenocortical Carcinoma	0.301849	0.089933
358bc4a0-7ebe-4dac-824c-fa9843bbd89e	Cancer_Adrenocortical Carcinoma	0.11811	0.0565577
8e0fcab2-b304-4858-91a6-93ed07e01e22	Cancer_Adrenocortical Carcinoma	0.869334	0.0511392
83ec5f6f-c879-4628-a89b-5fac7dae347b	Cancer_Adrenocortical Carcinoma	0	0.0429895
b22a7bf1-eeba-4236-93e0-95a06c1eae2c	Cancer_Adrenocortical Carcinoma	0.486653	0.0356482
3cef5bda-3e2f-4784-86bd-4b48f096e0eb	Cancer_Adrenocortical Carcinoma	0	0.0289369
c16269e6-4695-4198-a98d-b674b536c64d	Cancer_Adrenocortical Carcinoma	0.171315	0.024626
5de8db95-ab16-4cc0-befb-17af912a0e3b	Cancer_Adrenocortical Carcinoma	0.39676	0.0197808
46bdfb10-0004-407b-ae89-fe0e3319e7f2	Cancer_Adrenocortical Carcinoma	0.136202	0.00605997
da14a25b-1040-43fa-b8bf-24df51591cbe	Cancer_Adrenocortical Carcinoma	0.198654	0
fd1eed01-1c39-4e91-ab00-d314c54cea38	Cancer_Adrenocortical Carcinoma	0.031698	0
b4c035eb-d9e0-4a5b-a7e8-daee10c17fe7	Cancer_Adrenocortical Carcinoma	0.275989	0
c12cc6ff-ade5-4603-9749-2a8b15b63d01	Cancer_Adrenocortical Carcinoma	0.0981399	0
b860c6bf-8ee5-478d-99fd-988feccc0cb6	Cancer_Adrenocortical Carcinoma	0.441126	0
3093ffe5-32ff-4e61-891e-d786a6d255a1	Cancer_Adrenocortical Carcinoma	0.165821	0
34388e0f-80f9-483a-9d0a-dbcde691e167	Cancer_Adrenocortical Carcinoma	0.0812407	0
6217dddc-a7bd-4107-8e25-e2aa488b73bf	Cancer_Adrenocortical Carcinoma	0.0824598	0
a8c36f60-f108-4f32-8da7-b3e5b7b1d3da	Cancer_Adrenocortical Carcinoma	0.172626	0
a9b0269c-c36d-4266-bf42-fed09ae13a82	Cancer_Adrenocortical Carcinoma	0.202435	0
aedb5714-6162-44a7-9a19-541b5f8b7240	Cancer_Adrenocortical Carcinoma	0.122691	0
e34a4d48-8c02-46fc-ae9d-d45d484bacaa	Cancer_Adrenocortical Carcinoma	0.0144791	0
abb5e66f-66cb-42f2-8345-6586e0a1e233	Cancer_Bladder Urothelial Carcinoma	14.806	0.97151
21ef91c8-b3db-4478-8c62-b3c0695dbd50	Cancer_Bladder Urothelial Carcinoma	8.35849	0.867441
8246d561-3abe-44b3-af70-05b789c7df20	Cancer_Bladder Urothelial Carcinoma	13.1828	0.774782
4a200687-aabe-4424-a1bd-fc7be9f1b915	Cancer_Bladder Urothelial Carcinoma	0.76553	0.718866
13352b83-33ff-4039-861f-061e3374fc2b	Cancer_Bladder Urothelial Carcinoma	2.57115	0.342652
23348b0c-b57e-49b4-a334-ab7c92e6ed5a	Cancer_Bladder Urothelial Carcinoma	0.976598	0.339015
0cb34818-6a44-4385-89ea-edb60198d980	Cancer_Bladder Urothelial Carcinoma	5.16267	0.271649
8263aac1-4022-4c69-a1dc-3a9948b36ba4	Cancer_Bladder Urothelial Carcinoma	0.178908	0.24929
cde5a288-ecf4-4894-a3f0-f986568e6833	Cancer_Bladder Urothelial Carcinoma	8.32656	0.151999
378f3574-035a-4e88-bafc-8ea439e939db	Cancer_Bladder Urothelial Carcinoma	0.819652	0.112514
829e96c3-da63-4e29-b51c-b8952fd27137	Cancer_Bladder Urothelial Carcinoma	0.397168	0.102233
d2beac65-0b94-42df-b9e6-f1dac98f183e	Cancer_Bladder Urothelial Carcinoma	0.788277	0.100302
c2922aea-5123-443b-bcc2-981ec7cf07f0	Cancer_Bladder Urothelial Carcinoma	0.696459	0.0718522
34a983f7-aef7-4fe5-bdf7-947702277eb3	Cancer_Bladder Urothelial Carcinoma	0	0.0686851
67ed7d4d-6b96-4b86-ad14-5c50d34b1abc	Cancer_Bladder Urothelial Carcinoma	1.05859	0.0615586
fb25f601-fc85-419d-bc67-e305eb43eda7	Cancer_Bladder Urothelial Carcinoma	1.67975	0.048193
40625648-4805-49ff-aebe-4dba9f566390	Cancer_Bladder Urothelial Carcinoma	0.685	0.0259269
e2d1c228-6607-47c6-b03f-107316c5bea4	Cancer_Bladder Urothelial Carcinoma	0.680778	0.024401
f94c4b33-da05-4c07-8c7b-d8369ca81051	Cancer_Bladder Urothelial Carcinoma	0.28328	0.0212324
03b2efe6-f689-42ab-a6fa-21b2f058fffc	Cancer_Bladder Urothelial Carcinoma	1.12876	0.0132078
9fb269fe-5824-4846-b1ff-3a97d9058f1f	Cancer_Bladder Urothelial Carcinoma	0.509217	0
5afea2c1-825a-4f19-abea-dc4fa191b190	Cancer_Bladder Urothelial Carcinoma	0.141889	0
95ac43f8-94e2-413a-bba1-46bf191df085	Cancer_Bladder Urothelial Carcinoma	0.0350953	0
9268afe0-2bfc-4027-a3a9-1da8dc4b6707	Cancer_Bladder Urothelial Carcinoma	0.125007	0
3f487a76-ca8a-497d-b063-cf2b2952cde5	Cancer_Brain Lower Grade Glioma	1.09978	0.0747196
310f48ca-f924-4087-9921-2e4ebc306950	Cancer_Brain Lower Grade Glioma	5.28586	0.0665159
afe25cb0-799f-49ae-9121-cfec871f5ad7	Cancer_Brain Lower Grade Glioma	0	0.0541285
32cb34e4-46c0-4095-b0db-c9f6b5c05b78	Cancer_Brain Lower Grade Glioma	0.878217	0.0507622
304692ab-f04f-41c4-88b4-ca404cb7c80e	Cancer_Brain Lower Grade Glioma	1.40555	0.0465984
ebd7f0f0-4512-49ec-b512-454d90ad596c	Cancer_Brain Lower Grade Glioma	1.1259	0.0424839
b0241d74-8a96-483d-acbf-afef7277a76e	Cancer_Brain Lower Grade Glioma	0.675449	0.0272756
ed591428-fc55-4a0b-b87f-a66e219c7ca6	Cancer_Brain Lower Grade Glioma	0.51197	0.025102
818c3707-e792-4121-8fd8-56a64c3f30eb	Cancer_Brain Lower Grade Glioma	0.67807	0.0230571
715d68e5-cba9-45b0-bc61-d05d2b484075	Cancer_Brain Lower Grade Glioma	0.0891135	0.021932
02154742-a410-4ce5-93ca-caaff7e55dac	Cancer_Brain Lower Grade Glioma	1.22015	0
00d06cc4-ddf6-4fda-89a5-f72a2af546dd	Cancer_Brain Lower Grade Glioma	2.04888	0
9d3ae6fe-de4c-4b2f-acb1-bb54a8687bad	Cancer_Brain Lower Grade Glioma	7.21638	0
4ec2fc83-5c0c-488f-8dc4-4219c15c6eda	Cancer_Brain Lower Grade Glioma	0.913403	0
a2184c3a-82c7-44f7-9ab7-9ee25e003cb2	Cancer_Brain Lower Grade Glioma	1.01296	0
82480dba-1c6c-461f-b9e4-a35ce4144328	Cancer_Brain Lower Grade Glioma	0.306565	0
9288eab0-ad39-4ae9-8c41-9d294b530f19	Cancer_Brain Lower Grade Glioma	0.267663	0
7cc13c4e-4ea7-441b-a589-0ace1c49aafb	Cancer_Brain Lower Grade Glioma	0.179199	0
0b491854-27b9-4c41-ae16-7413c1ac0d09	Cancer_Brain Lower Grade Glioma	0.320657	0
1d8134ef-cbd7-4ec1-b155-6617fd139ba8	Cancer_Brain Lower Grade Glioma	0.198608	0
433fa923-2a92-4200-bfbf-3473a70b963f	Cancer_Brain Lower Grade Glioma	1.13217	0
43cee8b5-c602-4190-9c7d-56ddfd2c490a	Cancer_Brain Lower Grade Glioma	0	0
e97236a9-4248-4eb6-b1d4-f83cf100f5a4	Cancer_Brain Lower Grade Glioma	0.38278	0
eec6cd24-dfc5-4c13-a430-36a57ce642ae	Cancer_Brain Lower Grade Glioma	0	0
fb488df1-93c4-4676-a699-3766731ee4ca	Cancer_Breast Invasive Carcinoma	29.4092	1.04371
4e2b51eb-1ab8-40f2-a31a-8c799d48e6d3	Cancer_Breast Invasive Carcinoma	1.87795	0.303772
db95c977-8cc1-447e-8ddf-b4d32b93b1f2	Cancer_Breast Invasive Carcinoma	1.43151	0.235148
d82718d0-c376-4e45-84b1-36d98efd15dc	Cancer_Breast Invasive Carcinoma	0.422147	0.217104
607cbc73-b640-4bab-b7d7-babefdf0fedf	Cancer_Breast Invasive Carcinoma	0.803396	0.200934
54f4a051-e668-49f5-b38f-96f26841ca02	Cancer_Breast Invasive Carcinoma	0	0.175471
f5099442-8742-4f51-b88b-52ac9253d4f8	Cancer_Breast Invasive Carcinoma	0.430849	0.165041
ebdf2d0e-d309-442f-8e8b-e7b175bcb1c7	Cancer_Breast Invasive Carcinoma	1.40144	0.0914101
1ded5bff-8aab-41fb-8da1-b9cbd52e6da5	Cancer_Breast Invasive Carcinoma	1.96617	0.0608089
6cbf61e2-e54f-49e4-a3b2-99195ec695f3	Cancer_Breast Invasive Carcinoma	0.439446	0.0415604
fb76cae1-8b63-4459-9c06-597dfd080a66	Cancer_Breast Invasive Carcinoma	1.35758	0.0303708
f683321b-48f8-4441-87e6-6e4e8651f138	Cancer_Breast Invasive Carcinoma	0.241577	0.0279837
e1a4167d-b4ca-405c-8550-cc32bb1b1d09	Cancer_Breast Invasive Carcinoma	1.09614	0.0189819
1a2c9e96-f861-4da0-b1b4-ad15baf85d4e	Cancer_Breast Invasive Carcinoma	0.696039	0.0121461
f1ac7898-c061-4405-b043-667ca8a46b72	Cancer_Breast Invasive Carcinoma	0.174878	0
b0b82787-a5bb-4f1b-be2a-41efd318139e	Cancer_Breast Invasive Carcinoma	8.36922	0
bb1b9616-f67a-40e7-842d-28da9d67fef5	Cancer_Breast Invasive Carcinoma	1.24905	0
c3588f96-95c6-4008-bda2-502ceb963adb	Cancer_Breast Invasive Carcinoma	1.30843	0
74e417e4-ea6b-4943-bf1b-354a3e8f6120	Cancer_Breast Invasive Carcinoma	0.961232	0
cea4b42a-8d48-43f2-96a3-53f32b0f0c5e	Cancer_Breast Invasive Carcinoma	1.11979	0
6cfa0ff3-0cf8-498b-82f6-5f1b5c89a609	Cancer_Breast Invasive Carcinoma	1.49753	0
1f6ab8ee-9f1d-4c71-b7ca-e77a922380c4	Cancer_Breast Invasive Carcinoma	0.466727	0
e7703880-2483-4240-9aa2-a85c3802e538	Cancer_Breast Invasive Carcinoma	0.75229	0
df0d7338-3885-451d-a424-f390f64d8bb9	Cancer_Breast Invasive Carcinoma	0.234316	0
4b71d73c-9cd9-4a7e-9e72-cdc92496e465	Cancer_Cervical Squamous Cell Carcinoma and Endocervical Adenocarcinoma	0.151771	1.64059
bc54058c-5a1e-442d-adfc-484718476416	Cancer_Cervical Squamous Cell Carcinoma and Endocervical Adenocarcinoma	43.3451	1.48263
17de7ab0-cb29-40a5-8821-9944b4097783	Cancer_Cervical Squamous Cell Carcinoma and Endocervical Adenocarcinoma	4.04134	0.850495
90900f43-227a-49e3-9d1a-6f440b2718fd	Cancer_Cervical Squamous Cell Carcinoma and Endocervical Adenocarcinoma	10.7404	0.375152
9ee011fd-9789-4d26-9075-a3824a55329f	Cancer_Cervical Squamous Cell Carcinoma and Endocervical Adenocarcinoma	6.47814	0.364256
5f07f8a9-dc8e-4df2-8524-cc2c69b93342	Cancer_Cervical Squamous Cell Carcinoma and Endocervical Adenocarcinoma	23.2827	0.264424
ddbbe532-5f3f-40af-8179-64ad5c2c4c37	Cancer_Cervical Squamous Cell Carcinoma and Endocervical Adenocarcinoma	1.01417	0.232128
4e099ea0-983d-4e37-b1d3-d000c8509f40	Cancer_Cervical Squamous Cell Carcinoma and Endocervical Adenocarcinoma	1.60011	0.185621
a87882a9-b27e-48e3-84c3-0616f3574dfe	Cancer_Cervical Squamous Cell Carcinoma and Endocervical Adenocarcinoma	1.16065	0.16637
d966d633-688f-4764-ae84-c6ee930fcfa1	Cancer_Cervical Squamous Cell Carcinoma and Endocervical Adenocarcinoma	0	0.15708
b6bc4f03-3230-4601-88b4-df3145f85f5f	Cancer_Cervical Squamous Cell Carcinoma and Endocervical Adenocarcinoma	2.38701	0.145226
13f08e6c-35e9-47bd-9906-491f4bc22312	Cancer_Cervical Squamous Cell Carcinoma and Endocervical Adenocarcinoma	2.4215	0.140594
21f5bf50-6a89-49a6-a72b-8a77343e4337	Cancer_Cervical Squamous Cell Carcinoma and Endocervical Adenocarcinoma	0.151746	0.0920633
438d5b5c-4e37-442f-be1d-e9de2e642846	Cancer_Cervical Squamous Cell Carcinoma and Endocervical Adenocarcinoma	6.71695	0.0629236
259cc116-980a-4382-94d3-82dfb441110f	Cancer_Cervical Squamous Cell Carcinoma and Endocervical Adenocarcinoma	1.5236	0.0409875
16bdf013-548e-43a5-9d42-3e11a9c778ab	Cancer_Cervical Squamous Cell Carcinoma and Endocervical Adenocarcinoma	1.32015	0.0409743
4fc4019a-ea67-4f27-a070-ced009abac4e	Cancer_Cervical Squamous Cell Carcinoma and Endocervical Adenocarcinoma	1.12569	0.0385672
b2c4e862-25b5-4a70-9c7a-244e0de5d506	Cancer_Cervical Squamous Cell Carcinoma and Endocervical Adenocarcinoma	7.02392	0.0335946
d77d0445-8844-40fd-9d76-e62b375a673e	Cancer_Cervical Squamous Cell Carcinoma and Endocervical Adenocarcinoma	0.983417	0.00667216
d73a9ee0-fd5b-48ad-ab14-ba43578fdff0	Cancer_Cervical Squamous Cell Carcinoma and Endocervical Adenocarcinoma	4.50596	0
85f477d2-f228-4c2d-ac9d-04db20f5ab42	Cancer_Cervical Squamous Cell Carcinoma and Endocervical Adenocarcinoma	0.340453	0
1470149a-3128-480d-a649-ded748da8e71	Cancer_Cervical Squamous Cell Carcinoma and Endocervical Adenocarcinoma	5.18806	0
23d12773-4630-4122-8984-3a1e179cba8d	Cancer_Cervical Squamous Cell Carcinoma and Endocervical Adenocarcinoma	3.5125	0
578b0b78-4d11-4fb4-9682-041ef3fc8a87	Cancer_Cervical Squamous Cell Carcinoma and Endocervical Adenocarcinoma	0.638154	0
514e293e-76c2-404a-8037-27e31c5a7f39	Cancer_Cholangiocarcinoma	16.6523	0.345915
7204338c-7777-4c15-b566-9b9c78366d39	Cancer_Cholangiocarcinoma	0.823083	0.29009
673dd808-cf12-4e7e-9de1-c32ef11fe742	Cancer_Cholangiocarcinoma	0.611372	0.184764
29a3ea37-4d36-4f4e-9f55-365a7ebba6a9	Cancer_Cholangiocarcinoma	0.757432	0.183404
5d1860dd-3ec0-4a4d-827d-95e0957d9db7	Cancer_Cholangiocarcinoma	0.172074	0.165194
3010c30d-e65e-4433-bfb9-2e724c7f3106	Cancer_Cholangiocarcinoma	1.06967	0.165035
6f8fd02b-464f-49fa-9e3f-91c1bef9cf5f	Cancer_Cholangiocarcinoma	0.254615	0.162596
6bccd083-a96d-4ca1-a3cf-84bf111df514	Cancer_Cholangiocarcinoma	2.88767	0.147135
f8d8c937-7551-4cf5-ab99-c36cfd092445	Cancer_Cholangiocarcinoma	1.33627	0.104281
b3284d8e-b147-4c53-ba30-2409cfba1848	Cancer_Cholangiocarcinoma	0.196308	0.0929938
d572e7a1-9092-4e42-bab5-929c3704b4c1	Cancer_Cholangiocarcinoma	0.138198	0.0617229
9768e4c5-551b-4263-a39f-410ce4bb5958	Cancer_Cholangiocarcinoma	0.535904	0.0566466
5be8442a-045e-482e-a95e-fee0dbf37492	Cancer_Cholangiocarcinoma	0.932481	0.0457027
05e83bf5-d53e-47b1-bf74-853877ba28ec	Cancer_Cholangiocarcinoma	0.22377	0.0382806
25a2e112-972b-4c08-80b4-7d631e1f8d7b	Cancer_Cholangiocarcinoma	0	0.0381098
1682f37b-83c0-41a9-84fc-9255897b4245	Cancer_Cholangiocarcinoma	0.180555	0.0332487
efb46bc9-82d4-414e-8949-a0294fcf1c08	Cancer_Cholangiocarcinoma	1.27628	0.030192
ccf96ae7-83f0-4cdc-9707-5dbebd5e0ec0	Cancer_Cholangiocarcinoma	1.42963	0.00525675
e7c17adf-cf50-4f06-9cb3-27443c8431d1	Cancer_Cholangiocarcinoma	0.632478	0.000193627
9105c481-bb1a-494a-8e93-f71a793bf04c	Cancer_Cholangiocarcinoma	0.377838	0
4271a821-1130-4e7f-ae72-ac9e99b67a3f	Cancer_Cholangiocarcinoma	0.535787	0
f22b02b7-2e41-44d3-ad7b-bc8891ab8728	Cancer_Cholangiocarcinoma	0.482692	0
828fb3e0-7548-4af0-b4c5-564eebaf8722	Cancer_Cholangiocarcinoma	0.257437	0
f98630f6-7cd3-4059-b6e1-72cfb61ebfc3	Cancer_Cholangiocarcinoma	0.138725	0
82efc3d4-dfd0-40be-a162-4e8e0dc21cc5	Cancer_Colon Adenocarcinoma	1.29296	0.478193
f68f332d-7d4d-4ba4-9137-34e7427c640f	Cancer_Colon Adenocarcinoma	0.544411	0.325505
805bced2-d006-4e50-b085-1ea048f546fd	Cancer_Colon Adenocarcinoma	3.87538	0.179168
b6fb6ac4-9a0e-49c9-abd3-e9e3d996fdb9	Cancer_Colon Adenocarcinoma	0.591673	0.164152
757f949f-6939-489d-9e71-f8d560b8c48a	Cancer_Colon Adenocarcinoma	0.735647	0.159513
a0d6c884-536c-46f7-ad97-7d7b75d2f51c	Cancer_Colon Adenocarcinoma	0.708146	0.153638
39bee428-0e4b-4ecd-83a3-2a86d7f3ab1c	Cancer_Colon Adenocarcinoma	1.00468	0.0986232
b13aec04-b858-4ba1-94d4-f4ba597d2d9f	Cancer_Colon Adenocarcinoma	0.442985	0.0745729
b624362c-0284-42db-9731-7e9f90f6272c	Cancer_Colon Adenocarcinoma	0.238967	0.0743552
95874ff8-e812-4910-9c37-1bd833da1cf1	Cancer_Colon Adenocarcinoma	3.59643	0.073489
c7562341-4438-4542-b6d7-a680f1d6020e	Cancer_Colon Adenocarcinoma	0.225912	0.0698997
e4ddee75-3b56-41ca-9ab7-09d1a8b61626	Cancer_Colon Adenocarcinoma	1.32259	0.0648288
dd099d2c-9b66-435c-99ad-a2dc96cb5ae7	Cancer_Colon Adenocarcinoma	1.00469	0.0643468
0ce7a043-07ae-49da-8c26-797c907e1d33	Cancer_Colon Adenocarcinoma	0.19455	0.0600703
35357ea6-a8e2-42c6-ab3b-2653babe2d67	Cancer_Colon Adenocarcinoma	0.550788	0.0303305
dd6cc03a-72d8-4ae9-a69e-9d880c390344	Cancer_Colon Adenocarcinoma	1.06837	0.0045769
ba652979-876d-474d-8473-7da79eb82115	Cancer_Colon Adenocarcinoma	2.00793	0
c513f9b0-764d-4db0-a163-9d2b28111957	Cancer_Colon Adenocarcinoma	0.392884	0
bdc5e928-ca2c-4cae-b3f3-80562db080bb	Cancer_Colon Adenocarcinoma	0.152136	0
791ce7f6-086f-4af2-a789-b2abe2a8e632	Cancer_Colon Adenocarcinoma	0.160742	0
5cfd418f-86fc-4c9a-a4cd-86c288fff30a	Cancer_Colon Adenocarcinoma	2.06365	0
653eb6a1-1b71-4f79-a3e8-37ae5e8e87ef	Cancer_Colon Adenocarcinoma	1.92068	0
e84d2134-d70b-4080-84c5-56d9ca1a1523	Cancer_Colon Adenocarcinoma	4.78705	0
823bd826-336b-455b-beaa-cb5f6b0ede65	Cancer_Colon Adenocarcinoma	0.891949	0
36256c08-ac0a-484f-b9b1-21b26d01cc43	Cancer_Esophageal Carcinoma	26.056	2.45631
b71c9e71-44c1-4a46-b720-eb75c2e472d0	Cancer_Esophageal Carcinoma	8.28836	1.7856
1620a1ba-20aa-4a85-9117-ea4a97f3f261	Cancer_Esophageal Carcinoma	0.981092	1.23065
819df9ae-865c-409c-a035-7b8ac6b918fc	Cancer_Esophageal Carcinoma	1.5431	1.02042
a1ae210e-cfd7-4193-a902-13a91dff3406	Cancer_Esophageal Carcinoma	1.26541	0.711485
081f8c2a-4e1a-4e1f-8bc0-b21ffcaa0a47	Cancer_Esophageal Carcinoma	0.395179	0.583657
33b9406d-a6bf-471e-95d5-58a1aa35ca0d	Cancer_Esophageal Carcinoma	0.450871	0.5674
7fa9e998-db44-4974-b5cf-7ba5421354f4	Cancer_Esophageal Carcinoma	3.73	0.310935
f8467ed3-0048-46c2-bc9b-451a04c5f768	Cancer_Esophageal Carcinoma	0.963531	0.302245
7e33dfa8-793d-406b-abd8-bb0a282f6da8	Cancer_Esophageal Carcinoma	0.536806	0.23122
bc8ee78a-a5d7-49c5-a57e-74a19ea7f549	Cancer_Esophageal Carcinoma	1.02037	0.209613
5db94003-cda3-4711-841e-d54c81c0632d	Cancer_Esophageal Carcinoma	2.96397	0.207511
84830c4c-6979-461b-a934-f4c90a304503	Cancer_Esophageal Carcinoma	0	0.131213
6577df5d-5ef0-403c-9a58-d20eafa79c2b	Cancer_Esophageal Carcinoma	0.724781	0.106932
b24cd5a6-5b39-43e9-a390-a6dc136cff72	Cancer_Esophageal Carcinoma	1.0236	0.0831237
2843eec5-2385-4c3c-a8e5-aeabbcd45ecc	Cancer_Esophageal Carcinoma	0.250275	0.0757302
141173e0-c488-4f62-a72b-69f4a686eca3	Cancer_Esophageal Carcinoma	0.679811	0.0506358
01dcd46c-af6a-42e2-8aad-e1e7435b93f4	Cancer_Esophageal Carcinoma	0.570377	0.0475082
2da968b9-14dd-4985-8940-a562e442c05c	Cancer_Esophageal Carcinoma	0.261862	0.0347336
760d738c-a504-43c5-a2b3-4b2a74f34d57	Cancer_Esophageal Carcinoma	0.395395	0
56be11ae-0b98-4e0a-982d-3c6b6e26313c	Cancer_Esophageal Carcinoma	0.813331	0
cd67620e-aeac-4f15-9573-9b73d9b570c1	Cancer_Esophageal Carcinoma	3.51844	0
0c122f9c-e1eb-46cc-86a2-a44278ebc8e8	Cancer_Esophageal Carcinoma	1.34892	0
0a9c8096-9273-45af-bee5-45af0e1bc938	Cancer_Esophageal Carcinoma	0.309951	0
fc534c42-60c7-495c-926b-39768a06d4c3	Cancer_Glioblastoma Multiforme	8.47874	0.318797
0fb8d0ed-fb27-4b1d-b465-0040628c2ca2	Cancer_Glioblastoma Multiforme	0.406885	0.101844
5280b92c-0fa4-4e7a-a18c-12c994f8c0b6	Cancer_Glioblastoma Multiforme	1.71347	0.0800887
a1f01073-e300-4472-810f-48de209f0e26	Cancer_Glioblastoma Multiforme	1.63265	0.0746551
2d2fa84d-c205-415f-9d35-e9719a6fd98f	Cancer_Glioblastoma Multiforme	3.14377	0.0709222
1c581e76-072d-4060-9a65-c3203a0f3918	Cancer_Glioblastoma Multiforme	0.1072	0.0628371
3dd6b389-ef88-4640-a9b0-c7117a2445ce	Cancer_Glioblastoma Multiforme	0.989789	0.0541598
593b8463-f60e-44b9-ad21-8952608ac325	Cancer_Glioblastoma Multiforme	0.873876	0.0393945
b26f3576-01a8-4048-a131-d90c232ef063	Cancer_Glioblastoma Multiforme	3.80793	0.0393265
df19a62e-ea78-40a2-b35f-ddbfe6131d01	Cancer_Glioblastoma Multiforme	0.591973	0.0370591
61366b3a-26e3-4f9e-baf5-9512ed44bbef	Cancer_Glioblastoma Multiforme	3.10433	0.0312548
11da168f-9361-44cb-bc39-77614802fb73	Cancer_Glioblastoma Multiforme	3.74887	0.0239112
01715c1f-2530-4943-a65c-0c4809dfba5a	Cancer_Glioblastoma Multiforme	0.0887782	0.0144551
fddd420e-1b94-4b88-993e-355291d8d74a	Cancer_Glioblastoma Multiforme	1.25433	0
3574d939-da89-4d0c-b523-5002160cb9b2	Cancer_Glioblastoma Multiforme	0.188056	0
32446235-b5ee-4f28-ab8c-242bade198d1	Cancer_Glioblastoma Multiforme	2.77589	0
212ae104-eccf-4888-a4e0-2e9be74ac1f1	Cancer_Glioblastoma Multiforme	2.67173	0
7120047e-ca19-486b-bc4c-3002c8a7563c	Cancer_Glioblastoma Multiforme	1.25425	0
60e26e91-6d7c-4603-8e8e-07ac14e091bc	Cancer_Glioblastoma Multiforme	0.687277	0
d9218a68-50c9-4557-a53e-ff1835f1e68f	Cancer_Glioblastoma Multiforme	0.447128	0
afbf758e-17ae-4265-96b9-30fe3b1cb42f	Cancer_Glioblastoma Multiforme	1.25526	0
18b748f6-e937-4d57-9b6c-3c3f28f82c79	Cancer_Glioblastoma Multiforme	0.203431	0
dc6da322-f307-4d57-8017-2402c75fefa2	Cancer_Glioblastoma Multiforme	0.774418	0
d5961821-edab-41a2-8a10-38bed8ec6610	Cancer_Glioblastoma Multiforme	0.676514	0
48350bd7-7cd2-4511-9c81-bc821c15864e	Cancer_Head and Neck Squamous Cell Carcinoma	32.3897	1.35682
9dea4460-9ef7-487e-b997-de68fc4fc6af	Cancer_Head and Neck Squamous Cell Carcinoma	27.7596	0.830928
b3b3fecb-48b0-417a-bdf0-ebadb5cb470b	Cancer_Head and Neck Squamous Cell Carcinoma	22.6447	0.697833
bfa87f1c-e1ca-4d38-ad60-d8151bd398d9	Cancer_Head and Neck Squamous Cell Carcinoma	0.921354	0.614947
d68a4a32-b855-42b8-b199-eb4ca55f528f	Cancer_Head and Neck Squamous Cell Carcinoma	7.92904	0.583094
223119ad-1d17-4a43-8792-2b27c0cf5f43	Cancer_Head and Neck Squamous Cell Carcinoma	12.2825	0.571174
d70c2ae7-118a-4df1-aa9b-e9045538e1fa	Cancer_Head and Neck Squamous Cell Carcinoma	6.17972	0.362587
724060e0-b4a8-485d-a5ac-04b5839be439	Cancer_Head and Neck Squamous Cell Carcinoma	4.84763	0.281854
fbd9ce12-1166-44f7-aec4-0b02e85f0835	Cancer_Head and Neck Squamous Cell Carcinoma	2.40174	0.265081
bb871040-afa6-41eb-baaf-f2f61c61765c	Cancer_Head and Neck Squamous Cell Carcinoma	3.73895	0.265029
52fd89e1-9f7d-4422-a7b8-ad021debbfe1	Cancer_Head and Neck Squamous Cell Carcinoma	7.04674	0.257997
9c97fbc3-6296-4410-b7bb-a0c21c15586b	Cancer_Head and Neck Squamous Cell Carcinoma	5.38254	0.230482
fce14f03-79d9-4305-ac9d-2b30cae34f93	Cancer_Head and Neck Squamous Cell Carcinoma	1.80308	0.225649
eee81a55-940a-4381-bb4a-aed860afe29d	Cancer_Head and Neck Squamous Cell Carcinoma	2.49666	0.220102
8b65268c-72b1-4dba-936f-1a84ceec8a05	Cancer_Head and Neck Squamous Cell Carcinoma	1.24986	0.194278
d9361138-2179-4c25-a750-6aab27f41e69	Cancer_Head and Neck Squamous Cell Carcinoma	0.976006	0.114938
31da43ba-a51c-41d0-a609-30ba6d1e1bc0	Cancer_Head and Neck Squamous Cell Carcinoma	3.31445	0.106839
b79a37d9-56f2-4e9a-8fdc-ee1ba1634cf2	Cancer_Head and Neck Squamous Cell Carcinoma	8.51927	0.104587
ab838180-3da7-493f-8410-b1564abcb511	Cancer_Head and Neck Squamous Cell Carcinoma	0.447047	0.0829188
9f234c31-fbf7-4f70-afde-714f7620d86e	Cancer_Head and Neck Squamous Cell Carcinoma	3.6802	0.0538363
ab08bb37-c1bb-4554-80a8-e983d8d6d5e3	Cancer_Head and Neck Squamous Cell Carcinoma	7.91913	0
05badd38-e1fc-4d42-9712-046073cc1008	Cancer_Head and Neck Squamous Cell Carcinoma	1.06793	0
3a7cde69-256a-4573-95bb-a631621c6617	Cancer_Head and Neck Squamous Cell Carcinoma	1.64885	0
ef110e9b-582c-4a57-9317-3ec99a4cc007	Cancer_Head and Neck Squamous Cell Carcinoma	0.558161	0
3b61c256-387d-4bb8-866e-68a5c0173654	Cancer_Kidney Renal Clear Cell Carcinoma	3.99081	0.335352
52d0cf8a-f407-4964-99e2-dd16bd8106e4	Cancer_Kidney Renal Clear Cell Carcinoma	1.47329	0.232862
8fd96c78-0868-4961-8593-ad04462e1ec0	Cancer_Kidney Renal Clear Cell Carcinoma	0.603551	0.10671
3804393d-802f-4544-b3c2-c8e6f68c452e	Cancer_Kidney Renal Clear Cell Carcinoma	3.06654	0.105182
1e557b85-4efb-4c8f-a4ef-fb2164ceb5d9	Cancer_Kidney Renal Clear Cell Carcinoma	1.52139	0.0917728
450b2028-0e46-4ce6-b99f-7fb1f52e542a	Cancer_Kidney Renal Clear Cell Carcinoma	0.167599	0.084927
7336eaf8-7ace-439f-a2e1-4167c836919e	Cancer_Kidney Renal Clear Cell Carcinoma	3.29864	0.0827946
891484bc-8ef7-4047-bae5-5efd7eac7c96	Cancer_Kidney Renal Clear Cell Carcinoma	1.29544	0.0825672
c6ac32f8-9f06-48b1-a84f-83df6e9c320f	Cancer_Kidney Renal Clear Cell Carcinoma	0.611052	0.0733653
61d51754-0787-4d43-a710-c2dc052db2ef	Cancer_Kidney Renal Clear Cell Carcinoma	2.5345	0.0625298
d5989af8-909b-4a0c-8889-a8fcd62e3106	Cancer_Kidney Renal Clear Cell Carcinoma	0.674882	0.0199372
fa5d2cb0-703c-4fbf-8b4a-d949d7819eba	Cancer_Kidney Renal Clear Cell Carcinoma	1.43568	0.0155747
c431ff32-5d09-426a-bfb5-af6a82b693a0	Cancer_Kidney Renal Clear Cell Carcinoma	0.723754	0.0010433
1f5d00bc-b20e-4396-a727-f3339b36d635	Cancer_Kidney Renal Clear Cell Carcinoma	1.38175	0
7c34b624-5546-4c3a-8886-5913cfc30f02	Cancer_Kidney Renal Clear Cell Carcinoma	0.592149	0
7d81a6c5-d44c-498c-bda4-75cde5b88e23	Cancer_Kidney Renal Clear Cell Carcinoma	0.461875	0
10ee6a36-508d-4cd1-8d21-a57d5ff59291	Cancer_Kidney Renal Clear Cell Carcinoma	1.15416	0
6d28f1a8-b53f-42dc-b026-5f03a4d4c34f	Cancer_Kidney Renal Clear Cell Carcinoma	2.84578	0
c9c33366-468d-424d-b59f-2cd90de8376f	Cancer_Kidney Renal Clear Cell Carcinoma	0.733095	0
60c630bf-a701-42ea-8102-0be182dc5497	Cancer_Kidney Renal Clear Cell Carcinoma	1.81969	0
baa35259-3525-4599-9c50-1d7e0bfbf985	Cancer_Kidney Renal Clear Cell Carcinoma	1.82481	0
9a555a3a-a530-4c1d-953f-b9114ad0e7b2	Cancer_Kidney Renal Clear Cell Carcinoma	0.776949	0
456a99cb-53ab-4f2a-8c57-7d08fab2fcd3	Cancer_Kidney Renal Clear Cell Carcinoma	1.12376	0
784dd199-3b19-4b0d-a25a-d98c0aa23d4a	Cancer_Kidney Renal Clear Cell Carcinoma	0.214474	0
753f54d4-1994-4a3a-adeb-a37df28973d6	Cancer_Kidney Renal Papillary Cell Carcinoma	6.05507	0.641278
2d2bc70e-9078-47d3-8f08-418d6ab9c8c1	Cancer_Kidney Renal Papillary Cell Carcinoma	15.021	0.429526
7d5abc6a-c4d5-4bb5-bcf0-8ad7a75691a1	Cancer_Kidney Renal Papillary Cell Carcinoma	4.08731	0.294379
98acdadf-fd25-4344-8e99-c0b676806bf1	Cancer_Kidney Renal Papillary Cell Carcinoma	2.23463	0.233698
291bab1e-5d83-4b8f-9212-ecec1278ea1a	Cancer_Kidney Renal Papillary Cell Carcinoma	0.637302	0.229186
d8b01bb7-1bac-4982-8062-c3185f536c5c	Cancer_Kidney Renal Papillary Cell Carcinoma	1.50606	0.204619
3b8b0267-9451-41f6-91bc-894d581a32d5	Cancer_Kidney Renal Papillary Cell Carcinoma	0.616406	0.169866
48509321-6db5-4494-b852-51a98dbfaba1	Cancer_Kidney Renal Papillary Cell Carcinoma	0.426299	0.123839
d5dc26b3-b709-405f-9dfe-295089ec2ce1	Cancer_Kidney Renal Papillary Cell Carcinoma	0.585457	0.106741
e67a4226-4bf6-4c1d-a26c-f257dbd43210	Cancer_Kidney Renal Papillary Cell Carcinoma	2.32285	0.0641823
dc5d11b5-742f-4740-acd0-2806962d9d1b	Cancer_Kidney Renal Papillary Cell Carcinoma	0.855181	0.059509
931e349a-07c1-4bf2-8ac2-95163d66b9f5	Cancer_Kidney Renal Papillary Cell Carcinoma	0.937469	0.0584411
db7d44cb-0fa8-4529-9105-d377e8ff1762	Cancer_Kidney Renal Papillary Cell Carcinoma	0	0.0384517
867cea75-25bb-4775-b7ee-63a2dd724b24	Cancer_Kidney Renal Papillary Cell Carcinoma	0.911193	0.0373493
d7eb0631-a882-446e-ab1f-71b260f0c631	Cancer_Kidney Renal Papillary Cell Carcinoma	1.65507	0.0351487
50e72f2a-feb5-4fe8-b6c3-5b70f8916e0e	Cancer_Kidney Renal Papillary Cell Carcinoma	0.516344	0.0229571
d69f87da-af27-45bc-9bb5-3e80cf8a2fad	Cancer_Kidney Renal Papillary Cell Carcinoma	4.60425	0.022578
4c2ee28f-c2b7-4909-884e-c200469a28d6	Cancer_Kidney Renal Papillary Cell Carcinoma	1.05469	0.0182825
8d66c918-9556-4963-96eb-1633b6e3ca19	Cancer_Kidney Renal Papillary Cell Carcinoma	2.22584	0.0132589
5681bf46-da31-43d0-b340-84456abedfa0	Cancer_Kidney Renal Papillary Cell Carcinoma	1.93167	0.00870856
44bd908e-c082-4877-ba18-13a153d3f642	Cancer_Kidney Renal Papillary Cell Carcinoma	2.78932	0.0063325
a06113d4-f569-437a-98fc-f4fa43c105c8	Cancer_Kidney Renal Papillary Cell Carcinoma	1.32553	0
3f8417c4-b91b-4255-8db8-fd16f922598e	Cancer_Kidney Renal Papillary Cell Carcinoma	0.323531	0
8ce0c0f7-35db-4a0f-8305-bf2dd9ab12a1	Cancer_Kidney Renal Papillary Cell Carcinoma	1.31821	0
557b709b-a277-4bc4-8c9d-dadc6d3fa15a	Cancer_Liver Hepatocellular Carcinoma	0.283846	0.340552
dad4d80c-0c46-4e06-b82f-4bb9433d8fe6	Cancer_Liver Hepatocellular Carcinoma	0.461461	0.178008
36a626db-93d5-4947-8c63-160d86762802	Cancer_Liver Hepatocellular Carcinoma	0.427034	0.164795
4a630650-e3ee-4b38-89d2-4bd9af19df39	Cancer_Liver Hepatocellular Carcinoma	0.183979	0.120773
c35fda58-2581-48c8-9f48-c8758a040460	Cancer_Liver Hepatocellular Carcinoma	0.717166	0.106481
2ac9ffae-75ce-43f3-800e-76e3a18cac9d	Cancer_Liver Hepatocellular Carcinoma	0.329226	0.0838829
477ad562-2728-4499-a3cf-ac009624744f	Cancer_Liver Hepatocellular Carcinoma	0.0792815	0.0529652
a799d286-cfff-40cb-99aa-250637383ca7	Cancer_Liver Hepatocellular Carcinoma	0.246131	0.0468963
7dce9ce8-0f11-4b8e-a906-1cae3034147b	Cancer_Liver Hepatocellular Carcinoma	0.234377	0.0365774
670feb21-7910-4b76-8ac4-29edb2772542	Cancer_Liver Hepatocellular Carcinoma	0.50743	0.0345161
49ff6102-c413-43e8-8ea8-54cda1e5201c	Cancer_Liver Hepatocellular Carcinoma	0.218047	0.0198226
637d4348-c79a-46ab-9865-811e7dc1edb9	Cancer_Liver Hepatocellular Carcinoma	0	0.010709
d75bf376-5eb3-47af-9524-5c8ca9d1961b	Cancer_Liver Hepatocellular Carcinoma	0.621807	0
a98faab0-6c01-4030-b062-966190c104e8	Cancer_Liver Hepatocellular Carcinoma	0.100105	0
b1c20c05-f7c1-4791-9fb3-90df7e152fff	Cancer_Liver Hepatocellular Carcinoma	0.65605	0
0e5f4da6-794c-4b1a-91b4-e115dfc1e53c	Cancer_Liver Hepatocellular Carcinoma	0.182684	0
ddf5ba12-3a89-47d0-964e-4ea1773d7c43	Cancer_Liver Hepatocellular Carcinoma	0.163013	0
26b5af69-e378-4508-8b7a-6ef5a77354f4	Cancer_Liver Hepatocellular Carcinoma	0.319216	0
4af307e4-e264-4dfa-b1a9-f6616e702b36	Cancer_Liver Hepatocellular Carcinoma	0.198857	0
d083a68f-f1d2-4179-8461-fb85df9c7417	Cancer_Liver Hepatocellular Carcinoma	0.161575	0
1cf999f1-480f-4a87-abb6-ff7e059b85da	Cancer_Liver Hepatocellular Carcinoma	0.0324658	0
360e019d-258f-4b15-a43e-085840f38fa0	Cancer_Liver Hepatocellular Carcinoma	0.405607	0
6ff61549-59da-468e-8ec3-a48bb246343e	Cancer_Liver Hepatocellular Carcinoma	0.104065	0
ba4c43bb-ba6a-486e-9a16-87515adf54ff	Cancer_Liver Hepatocellular Carcinoma	0.129828	0
b4f01540-6a25-4ef6-8903-d74d639b1a2c	Cancer_Lung Adenocarcinoma	7.28184	3.21413
89b85540-2c4d-4f9a-8ca1-f5f4d96485f2	Cancer_Lung Adenocarcinoma	5.96396	1.01212
c724c63a-bd1c-4c3a-bb6e-a45851bc1cff	Cancer_Lung Adenocarcinoma	4.61427	0.697817
418985cf-3f58-4673-9303-961204e7c470	Cancer_Lung Adenocarcinoma	4.96488	0.399264
97213ae3-3d55-4d5c-9ab7-aaedb58adf91	Cancer_Lung Adenocarcinoma	5.20172	0.386624
df3bbe0f-5c32-4a81-9826-95ddf6c023d9	Cancer_Lung Adenocarcinoma	2.64667	0.237769
b2b94908-945e-4a92-add4-e658d5a675f9	Cancer_Lung Adenocarcinoma	1.01103	0.175633
55427b1d-4160-45fd-a5d4-a72d724e87b4	Cancer_Lung Adenocarcinoma	2.77781	0.129929
5a66bb8d-7df6-4655-806d-1451370d27a9	Cancer_Lung Adenocarcinoma	1.30119	0.122224
67e31df5-7c79-4f2c-ad71-1a4bc376c728	Cancer_Lung Adenocarcinoma	1.00657	0.0973301
4710fc26-1185-4436-b315-db0380bd9080	Cancer_Lung Adenocarcinoma	1.07998	0.0866644
e61b8a2e-0004-4dec-ac69-8a6f1bd91267	Cancer_Lung Adenocarcinoma	0.31859	0.0821004
346dd6ea-76b5-4e01-926d-07832d3a76c4	Cancer_Lung Adenocarcinoma	0.80494	0.0803008
7e92084b-a836-48c0-8868-5704aae62707	Cancer_Lung Adenocarcinoma	0.509819	0.0772503
3d2b7c58-6ae8-4199-8782-b4c37b52e757	Cancer_Lung Adenocarcinoma	1.88332	0.0740701
c0c2b41b-a1ab-4807-8884-031bcf0f2d78	Cancer_Lung Adenocarcinoma	2.00312	0.0442861
2a8cf710-6197-4a1c-b7b3-97bbb975c715	Cancer_Lung Adenocarcinoma	1.80012	0.0354523
c4ad66f0-aeaa-4403-83f2-9de01fbdf121	Cancer_Lung Adenocarcinoma	1.01804	0.0317871
bf42e41f-19ac-40c7-abde-ee23378f4606	Cancer_Lung Adenocarcinoma	3.33257	0
815e2d8c-0ef5-4600-a6fb-d5878a67bee2	Cancer_Lung Adenocarcinoma	2.53188	0
51ccb3d6-e0d2-4729-991e-46809c28a463	Cancer_Lung Adenocarcinoma	2.35254	0
0330e749-318e-4de9-9c99-1443594b6360	Cancer_Lung Adenocarcinoma	3.31463	0
38dc8f73-a4ec-4f38-a612-11cf1faa1d8d	Cancer_Lung Adenocarcinoma	1.65305	0
1bdf64ba-0881-4ab3-a2e6-e8c38d925e45	Cancer_Lung Adenocarcinoma	0.686067	0
1280e632-dde5-4268-b883-7d2e9e796cb6	Cancer_Lung Squamous Cell Carcinoma	14.0049	1.12439
d72704a2-9a82-411d-bcf7-5bd1241babb9	Cancer_Lung Squamous Cell Carcinoma	4.97629	1.05851
c727b1d1-ba95-47cd-9082-4d4e5c3e66b0	Cancer_Lung Squamous Cell Carcinoma	1.21978	0.258545
ae4c219c-a365-4bdf-bbe3-2b4fc9574548	Cancer_Lung Squamous Cell Carcinoma	6.07592	0.252795
1618c282-64d7-4a0b-bd84-895642c790bb	Cancer_Lung Squamous Cell Carcinoma	2.14087	0.146742
4e0e4980-35ee-409c-b6ac-07ec6f8a9713	Cancer_Lung Squamous Cell Carcinoma	0.611157	0.143303
7cfe090f-f275-4802-91e2-545be65208c2	Cancer_Lung Squamous Cell Carcinoma	7.24692	0.129173
23a41468-c57d-4870-97b6-db948c879a08	Cancer_Lung Squamous Cell Carcinoma	1.19394	0.103992
438eed4e-31fc-41fb-b085-fc3c3f740308	Cancer_Lung Squamous Cell Carcinoma	2.4186	0.0815777
62e52662-52a0-4c71-b527-6b5ca3197d39	Cancer_Lung Squamous Cell Carcinoma	0.995424	0.0723372
7664932f-1aee-4393-b4fc-5675d22c8069	Cancer_Lung Squamous Cell Carcinoma	2.20917	0.0672756
93d5b379-fb1d-4c10-b6b6-0cc1e831f078	Cancer_Lung Squamous Cell Carcinoma	1.07653	0.0344486
7898e54d-0c7e-48e6-bea8-8778f42ab57c	Cancer_Lung Squamous Cell Carcinoma	0.619386	0.0186646
9fb85109-c368-4fa0-ab7c-c3e38e5b1f3c	Cancer_Lung Squamous Cell Carcinoma	6.07026	0.0109999
45acfa1b-73d7-40c3-a607-1a72b5e70b68	Cancer_Lung Squamous Cell Carcinoma	1.46693	0.0105594
34b0b132-4cd6-4804-90d3-82b3a0e4be86	Cancer_Lung Squamous Cell Carcinoma	8.1555	0
7f37d4d0-be8b-4f0f-a2eb-d7368e279f04	Cancer_Lung Squamous Cell Carcinoma	1.88675	0
46671196-61ca-4557-b285-02694826df5a	Cancer_Lung Squamous Cell Carcinoma	1.77854	0
0f333474-d7f2-4eec-bc4d-fc45d7e662a5	Cancer_Lung Squamous Cell Carcinoma	5.55226	0
3f9360be-22d3-420b-9511-14ceb76f7426	Cancer_Lung Squamous Cell Carcinoma	1.35447	0
0eb189b3-3ad2-4875-b1ae-df2117455faf	Cancer_Lung Squamous Cell Carcinoma	0.295603	0
fc1b071f-3bc2-4748-8c58-8abe1d1e9e2f	Cancer_Lung Squamous Cell Carcinoma	0.124433	0
75b2dcfb-a7e8-4f5a-8816-17331d712397	Cancer_Lung Squamous Cell Carcinoma	0.567927	0
a5776667-a937-4fd7-90f2-d8e95092affd	Cancer_Lung Squamous Cell Carcinoma	0.310398	0
e882e2af-e073-4097-9dac-7c15c68ee123	Cancer_Lymphoid Neoplasm Diffuse Large B-cell Lymphoma	11.6299	1.43038
5ee2b314-52bd-44c8-8387-00d201d10b17	Cancer_Lymphoid Neoplasm Diffuse Large B-cell Lymphoma	34.3413	0.965545
825aca58-954f-47cd-902e-136f53d005fc	Cancer_Lymphoid Neoplasm Diffuse Large B-cell Lymphoma	0.721143	0.67693
83e80786-cf95-4373-befa-344d036ae5bf	Cancer_Lymphoid Neoplasm Diffuse Large B-cell Lymphoma	20.1985	0.357545
15deba77-15f4-4af3-a1f7-878d5acd97b8	Cancer_Lymphoid Neoplasm Diffuse Large B-cell Lymphoma	2.62958	0.357294
590ac1ac-e95d-4d96-bdb0-f4f30bd6d078	Cancer_Lymphoid Neoplasm Diffuse Large B-cell Lymphoma	1.55482	0.298211
831363ae-f91b-497f-857a-bd9ac9772b37	Cancer_Lymphoid Neoplasm Diffuse Large B-cell Lymphoma	17.1883	0.283132
c64ff893-508b-4569-880f-bcbd4b7e08c6	Cancer_Lymphoid Neoplasm Diffuse Large B-cell Lymphoma	2.54908	0.27513
4ccab227-bda2-495d-86b6-47a6f359a443	Cancer_Lymphoid Neoplasm Diffuse Large B-cell Lymphoma	9.81298	0.179376
dbc1dabd-11dc-46db-8114-367d248cffd6	Cancer_Lymphoid Neoplasm Diffuse Large B-cell Lymphoma	1.99979	0.164936
5ea946e8-68e3-4805-aead-f7a93c9fecaa	Cancer_Lymphoid Neoplasm Diffuse Large B-cell Lymphoma	0.91207	0.155864
814e57f2-5e21-4c5f-a03e-82a468ca96bf	Cancer_Lymphoid Neoplasm Diffuse Large B-cell Lymphoma	2.17346	0.0957784
57a136dd-ead1-46fd-ad39-2eb4ae210c4a	Cancer_Lymphoid Neoplasm Diffuse Large B-cell Lymphoma	22.9781	0.0824189
116af6e7-a7b3-4fa0-968f-93e6549bd0dc	Cancer_Lymphoid Neoplasm Diffuse Large B-cell Lymphoma	2.51374	0.0729735
23bf921d-c4e4-458e-aba7-3384d178334d	Cancer_Lymphoid Neoplasm Diffuse Large B-cell Lymphoma	0.696225	0.0630588
12fa76d0-f820-4a87-a84a-495ac9966e05	Cancer_Lymphoid Neoplasm Diffuse Large B-cell Lymphoma	0.215927	0.0610071
893e1ae4-da42-4a3d-840b-44f849521497	Cancer_Lymphoid Neoplasm Diffuse Large B-cell Lymphoma	2.6548	0.03646
060a1227-3002-4a79-a94b-353620131377	Cancer_Lymphoid Neoplasm Diffuse Large B-cell Lymphoma	1.40159	0.0358951
876f677c-74df-4bdb-bc65-250248c56d2a	Cancer_Lymphoid Neoplasm Diffuse Large B-cell Lymphoma	4.27684	0.0338153
e77a06e6-50c6-428e-a32e-61e82c1ad0b9	Cancer_Lymphoid Neoplasm Diffuse Large B-cell Lymphoma	1.57349	0
df9dbdd7-9f38-4ccb-9d70-c88754771766	Cancer_Lymphoid Neoplasm Diffuse Large B-cell Lymphoma	5.97136	0
2246051d-af05-45c9-95ac-c1ee7bdb3f0c	Cancer_Lymphoid Neoplasm Diffuse Large B-cell Lymphoma	8.16736	0
7a1471f5-c86a-4ebc-97fb-d62b41a690ff	Cancer_Lymphoid Neoplasm Diffuse Large B-cell Lymphoma	0	0
45463b7c-3817-41da-9e1d-aac153faae07	Cancer_Lymphoid Neoplasm Diffuse Large B-cell Lymphoma	4.19877	0
beee85bd-facc-4783-8f3d-ab82b816ff70	Cancer_Mesothelioma	1.40956	0.479058
d8784496-dd86-4071-a591-8f276032d1f1	Cancer_Mesothelioma	7.6729	0.209152
4dd86651-2563-463e-9b80-220a6a4a6e58	Cancer_Mesothelioma	3.00219	0.175224
919b5ce1-d7c5-4d45-a48e-9a1a79e78bc6	Cancer_Mesothelioma	3.61175	0.16588
8a8a8b43-abd4-4660-a1d4-d0ca6479abc4	Cancer_Mesothelioma	13.6644	0.160495
004ba8a7-bd46-46b7-8e46-de1bc3396477	Cancer_Mesothelioma	8.15287	0.159
55cbddc9-3ed2-407d-b5e9-44d77e715357	Cancer_Mesothelioma	0.490449	0.102416
85f669c7-784a-4617-9ba1-515a1f5a841c	Cancer_Mesothelioma	0.663919	0.0824839
36556e13-e4a6-4462-82e7-bb7467356526	Cancer_Mesothelioma	0	0.0556795
9d8666c3-e4fb-4c63-85cc-0973b63349ed	Cancer_Mesothelioma	0.259769	0.0540993
79f94c1b-8ee0-41c8-9ed0-96d95d9faee4	Cancer_Mesothelioma	0.767893	0.0480119
7fe8cbc9-356e-4020-a16f-bb2a9f5ab710	Cancer_Mesothelioma	2.22021	0.0465522
3ef342df-d44c-4649-ab55-112bd60b2e87	Cancer_Mesothelioma	0.423892	0.025088
3a882cac-26a9-4e55-b09e-881cfdb2fd6a	Cancer_Mesothelioma	0.451036	0.0190078
a203b18f-08e4-4351-b6c5-fdac4966e4d4	Cancer_Mesothelioma	0.556115	0.0190014
8963f635-5f65-429b-86ed-2650084a4244	Cancer_Mesothelioma	0.428561	0.0149128
c5196bb8-6fb7-41e2-8e04-ddccbc75a3ea	Cancer_Mesothelioma	2.00052	0.00355455
1b840f4c-9609-44a1-a472-9ee9ff65be15	Cancer_Mesothelioma	0.40705	0
c1f482e3-0b5a-4eb7-afa5-448d11d7600d	Cancer_Mesothelioma	0.60043	0
2c090384-01d0-4d1d-9747-a0ec9a7cde39	Cancer_Mesothelioma	0.303948	0
8dbad146-caa6-4b78-b1a2-492ccdc3518a	Cancer_Mesothelioma	0.402103	0
1bff1f0c-a4e0-4cb7-9e87-ea3ae24d83c6	Cancer_Mesothelioma	0.460926	0
151dddcb-5070-482b-a1b4-fe8898291e38	Cancer_Mesothelioma	0.31214	0
42b23ffc-8958-4951-a463-d6154a7f109c	Cancer_Mesothelioma	0.0713493	0
5c361d70-badf-4058-9c03-411ebb2a8d27	Cancer_Ovarian Serous Cystadenocarcinoma	0.907228	0.23208
f8241829-0aba-455d-bdab-9bd1fa60ce38	Cancer_Ovarian Serous Cystadenocarcinoma	1.1669	0.183779
fddad662-6df4-44d9-91a4-b99139c8460a	Cancer_Ovarian Serous Cystadenocarcinoma	1.10566	0.169654
ece8f282-b424-48be-89cb-989077ad6844	Cancer_Ovarian Serous Cystadenocarcinoma	0.952469	0.134546
05ad07c2-96a8-4337-af45-3e7d662895f3	Cancer_Ovarian Serous Cystadenocarcinoma	0.796236	0.129554
d91cfae3-2dfd-4c2b-911a-d5850974e7b0	Cancer_Ovarian Serous Cystadenocarcinoma	1.20997	0.113672
65f73f3f-4703-41b2-93a8-8c664870183f	Cancer_Ovarian Serous Cystadenocarcinoma	0.595608	0.11081
ee651268-ea91-4035-ba36-e96defa81cc0	Cancer_Ovarian Serous Cystadenocarcinoma	1.3796	0.100261
4d38ff5d-a9f4-48f2-89cc-34bb3608492f	Cancer_Ovarian Serous Cystadenocarcinoma	0.735736	0.0548439
9dab07e6-38b4-4fc8-8b53-21c47f1b8431	Cancer_Ovarian Serous Cystadenocarcinoma	1.16361	0.0516046
5581a52f-df5e-44d4-a2a9-05ac03342c7d	Cancer_Ovarian Serous Cystadenocarcinoma	1.17732	0.0437987
622aa6df-e8fa-405c-b56b-30a9f44744bb	Cancer_Ovarian Serous Cystadenocarcinoma	0.787868	0.0398434
fca18271-972d-4000-80b5-bff527475e44	Cancer_Ovarian Serous Cystadenocarcinoma	0.291987	0.0292232
fc6a155a-6f88-43a2-8bc8-9455aaccf5ad	Cancer_Ovarian Serous Cystadenocarcinoma	0.517221	0.019702
bf2d7478-d420-401c-9b11-946f483a6eec	Cancer_Ovarian Serous Cystadenocarcinoma	0.531808	0.0166421
a3fe5dd4-c762-448e-8b98-1a2fbb600fde	Cancer_Ovarian Serous Cystadenocarcinoma	0.315455	0.0158867
053fe63a-cae3-461d-a610-222b4e41cf76	Cancer_Ovarian Serous Cystadenocarcinoma	1.88698	0.0111059
5e4129f4-e8c2-461e-a94f-ebc34cf3c4a5	Cancer_Ovarian Serous Cystadenocarcinoma	0.482201	0
6c0837e4-e920-40a1-876b-847078af9b2c	Cancer_Ovarian Serous Cystadenocarcinoma	0.14375	0
0601ea34-3217-493b-86e1-01746844db71	Cancer_Ovarian Serous Cystadenocarcinoma	0.902695	0
b28f9df5-e6a6-4874-9c4e-fb60e4be2e8e	Cancer_Ovarian Serous Cystadenocarcinoma	0.391027	0
30452d72-a9d8-4637-85a7-2086d220082a	Cancer_Ovarian Serous Cystadenocarcinoma	0.44952	0
59dde5e6-ccd3-49c8-a69b-72fe1dd641d6	Cancer_Ovarian Serous Cystadenocarcinoma	0.185959	0
d60ab475-5684-4422-a6e2-c559394ea90e	Cancer_Ovarian Serous Cystadenocarcinoma	0.230802	0
8ba923e0-c6e5-4209-a88a-3e2ad208c993	Cancer_Pancreatic Adenocarcinoma	2.48608	0.489447
a42361c0-3f07-4ed5-a225-422bb02cdeaa	Cancer_Pancreatic Adenocarcinoma	0.358132	0.259818
3832f8e8-e016-411b-9602-e10258822f40	Cancer_Pancreatic Adenocarcinoma	1.298	0.259315
24c7ac0a-1fcd-4607-b54c-b8e1e34087de	Cancer_Pancreatic Adenocarcinoma	2.35825	0.152398
ebaa478a-d92d-45be-97c0-6890b1f6f2e9	Cancer_Pancreatic Adenocarcinoma	0.250656	0.128721
b47a759a-6149-4315-90e5-a8aae9ed63ba	Cancer_Pancreatic Adenocarcinoma	2.00162	0.0892532
ef5e5f4c-33a1-4dfc-badd-2dda9874d75b	Cancer_Pancreatic Adenocarcinoma	1.2884	0.0704359
26648bcd-791f-421a-8a21-6bca40fb0bc4	Cancer_Pancreatic Adenocarcinoma	1.33641	0.0632944
40fb7463-3e9a-4139-90ce-95a54f0faafc	Cancer_Pancreatic Adenocarcinoma	0.194723	0.0503291
2d79b502-81a7-4c4d-b64e-27510f78e102	Cancer_Pancreatic Adenocarcinoma	0.797937	0.0407311
71cb29b7-e163-4fd6-83aa-4cf86e2fad62	Cancer_Pancreatic Adenocarcinoma	1.59168	0.0402118
9182acae-5300-463a-9980-2745a54b61a6	Cancer_Pancreatic Adenocarcinoma	0.817207	0.0250887
d10afb5c-41ef-4b2a-9029-7b931c02d742	Cancer_Pancreatic Adenocarcinoma	0.404082	0.0238493
634dde08-b8f0-4519-944d-2997d5ee1ff3	Cancer_Pancreatic Adenocarcinoma	1.62185	0.0218098
f69d795f-8fb3-4498-a2f0-77cc559c1fe9	Cancer_Pancreatic Adenocarcinoma	0.0678722	0.0215609
591094bb-bead-4f1f-be99-c91e989747cc	Cancer_Pancreatic Adenocarcinoma	0.0509189	0.0208116
950ccc92-d5b6-4327-b8c6-77449c1e986c	Cancer_Pancreatic Adenocarcinoma	2.7431	0.00912858
e2b124ea-ebb6-425e-be32-ae31a480514b	Cancer_Pancreatic Adenocarcinoma	0.298795	0
6bc36507-09c1-4422-bd1c-a38a6c120506	Cancer_Pancreatic Adenocarcinoma	1.4194	0
61b89d67-7a81-47dc-a4b8-bf172dfc8529	Cancer_Pancreatic Adenocarcinoma	0.0799641	0
e1862af0-b2d9-4a77-9cc9-9963cec5f93c	Cancer_Pancreatic Adenocarcinoma	0.0339981	0
0b018015-9c9d-4a55-92ca-2d4090e66c8c	Cancer_Pancreatic Adenocarcinoma	1.52281	0
92e72010-763a-453a-8f76-a634959cb598	Cancer_Pancreatic Adenocarcinoma	0.745089	0
9860f40f-72dd-4e6f-bbc4-0697eed66146	Cancer_Pancreatic Adenocarcinoma	0.376168	0
cbca4da5-450b-4dac-a24e-6c5fb3ad09c6	Cancer_Pheochromocytoma and Paraganglioma	3.73861	0.403213
13174b7b-1048-43ef-b66a-be548013d0ec	Cancer_Pheochromocytoma and Paraganglioma	3.81384	0.291598
45b84c5a-dfd1-44e3-b425-b83203b5267f	Cancer_Pheochromocytoma and Paraganglioma	3.49865	0.232612
b4129cdd-243f-4083-9074-1e782270f10a	Cancer_Pheochromocytoma and Paraganglioma	5.9609	0.203284
d2dc9a57-7d41-4627-aa46-998856efb745	Cancer_Pheochromocytoma and Paraganglioma	0.789711	0.154436
28f271c2-8a5b-476d-95e1-83d9ebb2eeeb	Cancer_Pheochromocytoma and Paraganglioma	0.738941	0.132431
db6bc106-4a3c-45c2-aeea-7dd56cc930a3	Cancer_Pheochromocytoma and Paraganglioma	0.998065	0.106542
72558d24-213a-41b6-9b32-973ea406bd2c	Cancer_Pheochromocytoma and Paraganglioma	3.08444	0.101536
6b80910b-2946-4a55-9d9f-2c1cc8652acc	Cancer_Pheochromocytoma and Paraganglioma	0.0967169	0.100713
228ec51d-58a6-4c65-98b8-b5e27757be98	Cancer_Pheochromocytoma and Paraganglioma	1.9157	0.0913573
48f1a42e-ad29-4bdb-8aef-a3c74df181a7	Cancer_Pheochromocytoma and Paraganglioma	3.499	0.0836369
d7b8bbf4-3a3a-4351-a318-9a1708e31e2b	Cancer_Pheochromocytoma and Paraganglioma	0.814905	0.074951
01446c47-6772-4b3a-8e60-6031cae3a2fa	Cancer_Pheochromocytoma and Paraganglioma	5.77246	0.0643506
2732c98e-e424-456b-9a44-ff70cb28cf1b	Cancer_Pheochromocytoma and Paraganglioma	0.21126	0.0565786
a643df89-2c33-42dc-ab51-65f3778400e6	Cancer_Pheochromocytoma and Paraganglioma	0.035813	0.0433221
a0a02e5f-3b6f-4146-bf60-cb608cae953b	Cancer_Pheochromocytoma and Paraganglioma	3.95671	0.0429926
d3d448cf-e57f-43b8-91e4-59b0d9d5f3e9	Cancer_Pheochromocytoma and Paraganglioma	2.92541	0.0387825
979f9073-cb68-40e1-8b29-e8f676c46c4f	Cancer_Pheochromocytoma and Paraganglioma	0.0548755	0.0359268
49d157f4-381e-4aa0-8652-0de98a5a4729	Cancer_Pheochromocytoma and Paraganglioma	4.21733	0.0269026
cd265784-f6f6-43b4-b30b-62c35c08ed0c	Cancer_Pheochromocytoma and Paraganglioma	0.0594084	0.022323
caed60f2-a20f-4653-b8e9-6e06650a28ed	Cancer_Pheochromocytoma and Paraganglioma	0.534462	0.00972239
69603288-4ffc-4934-8e58-191cda043e8f	Cancer_Pheochromocytoma and Paraganglioma	6.5995	0
a8944211-554f-45b4-9f36-cea8ac2f6ba2	Cancer_Pheochromocytoma and Paraganglioma	4.33638	0
aa951a58-2019-4c8d-ac07-6429a0987860	Cancer_Pheochromocytoma and Paraganglioma	0.877795	0
48f14ee6-2fe8-49ce-8bdb-8c00d75816b9	Cancer_Prostate Adenocarcinoma	0.877563	0.0696432
0fb19ab3-73c1-4913-9c8c-fd8570ff1ba7	Cancer_Prostate Adenocarcinoma	0.672369	0.0303695
511464a5-0a10-4c1c-968e-ae566159521d	Cancer_Prostate Adenocarcinoma	0.284389	0.017797
597eefd0-f997-4cb5-a876-2a45b13f6e7c	Cancer_Prostate Adenocarcinoma	0	0
d5761094-167c-4371-87fb-11b3f55fda9a	Cancer_Prostate Adenocarcinoma	0.70768	0
2d6f7a5c-ff83-45ab-8515-57a33c4c9d5a	Cancer_Prostate Adenocarcinoma	0.302204	0
94e080b8-b373-4a9d-bdc1-70fd42e1c73b	Cancer_Prostate Adenocarcinoma	0.864614	0
e21921f4-70d0-4427-ab67-699d4e071484	Cancer_Prostate Adenocarcinoma	0.410593	0
55b58cf5-bf5a-40c0-9969-c59c452fdaf4	Cancer_Prostate Adenocarcinoma	1.09334	0
2463d2b6-af4e-46e0-81e4-4bbb13f2f083	Cancer_Prostate Adenocarcinoma	0.849424	0
f79b5067-9ed6-429b-a68a-f0d5c3a3326f	Cancer_Prostate Adenocarcinoma	0.806868	0
b16d9a52-1734-4173-95d1-4f4fe7e10db1	Cancer_Prostate Adenocarcinoma	0.621814	0
352f8b20-ce74-4f4f-b5ca-953933355006	Cancer_Prostate Adenocarcinoma	0.49164	0
4cd5985c-0aa4-446c-b733-768c61c1265c	Cancer_Prostate Adenocarcinoma	0.409378	0
bccb7a3e-27a0-4fd2-90ac-86943a3fc456	Cancer_Prostate Adenocarcinoma	0.635975	0
5fdd7878-315c-4211-863d-50b4e791ba33	Cancer_Prostate Adenocarcinoma	0.255447	0
d4fe7ec4-e7a8-4861-8b3e-b99d70144f1c	Cancer_Prostate Adenocarcinoma	0.436322	0
d1348393-cb7f-4db7-ae3a-3d17e08bc75c	Cancer_Prostate Adenocarcinoma	0.635336	0
94983358-b7cf-4c53-901c-d29f2fac3d6d	Cancer_Prostate Adenocarcinoma	0.223717	0
57f2b298-9d6c-421f-b0f6-f486e43d626b	Cancer_Prostate Adenocarcinoma	1.02624	0
11fe9b20-ad0b-4a90-8400-aa1c648e868f	Cancer_Prostate Adenocarcinoma	0.789939	0
53c4b96a-01f6-48e4-80e0-59dcae4fdcd6	Cancer_Prostate Adenocarcinoma	0.0551876	0
36516837-d34b-44f0-9874-c0d6911ef891	Cancer_Prostate Adenocarcinoma	0.0553309	0
62ab80cf-9556-45fa-8471-3c473ea73586	Cancer_Prostate Adenocarcinoma	0.128425	0
166eeba6-fe5a-49d9-abaf-9748904ac4e6	Cancer_Rectum Adenocarcinoma	0.426838	0.185854
268e2ee4-0169-4454-a576-ff0632601535	Cancer_Rectum Adenocarcinoma	0.365805	0.116677
f72e4c42-4c82-4620-85db-bbd9391fb50d	Cancer_Rectum Adenocarcinoma	1.86177	0.104984
63e3f82f-f8fd-46cc-9257-15fe79cae5a9	Cancer_Rectum Adenocarcinoma	0.341206	0.0999493
669b65a9-145a-42f0-934d-ef4e7791770c	Cancer_Rectum Adenocarcinoma	0.615437	0.0840597
dddb09dd-90c3-40c6-aa96-a9891d31ca23	Cancer_Rectum Adenocarcinoma	0.770704	0.0785924
b7a8acc2-d5f8-40b3-9919-bce45987e925	Cancer_Rectum Adenocarcinoma	0.936613	0.0587194
0f4add8a-9c66-4442-8807-e0a793906667	Cancer_Rectum Adenocarcinoma	0.273518	0.055701
04d25acd-c5d0-4619-ab61-1b8d32dbc877	Cancer_Rectum Adenocarcinoma	2.77482	0.041738
8f08aa0a-ce8d-41e2-81d1-bd2e76d57c17	Cancer_Rectum Adenocarcinoma	0.977464	0.0333741
84ac294f-a9e3-4245-a4d3-6e58ca75cfca	Cancer_Rectum Adenocarcinoma	0.259887	0.0301538
ab816440-a235-40e6-a0f9-da691a78b687	Cancer_Rectum Adenocarcinoma	0.517482	0.0295097
02fb1f7a-1db4-4a74-927f-4354b74fc803	Cancer_Rectum Adenocarcinoma	1.30153	0.0243033
e50010f1-dab3-4d73-a7eb-d742a62d4918	Cancer_Rectum Adenocarcinoma	1.98043	0.00328063
6eac957b-96a7-4197-a91d-3b0a2bfad86e	Cancer_Rectum Adenocarcinoma	0.173935	0.00240865
70ca211c-f793-4079-845b-5306186e3c56	Cancer_Rectum Adenocarcinoma	1.25565	0
a4848806-a25e-4918-9f1d-5b61b0dbfeb6	Cancer_Rectum Adenocarcinoma	2.16243	0
78d894d6-810a-4c41-890d-e70a620102cf	Cancer_Rectum Adenocarcinoma	1.33877	0
73549b98-6935-4903-ba5f-9d900670fa2f	Cancer_Rectum Adenocarcinoma	1.28845	0
8a19ad18-f83c-4699-a329-6a71ec91ed86	Cancer_Rectum Adenocarcinoma	0.715699	0
a61275c1-fc27-41cb-bf18-ac350c908166	Cancer_Rectum Adenocarcinoma	0.678057	0
d722fb7e-a795-4ded-b39c-5c3c65ae74cf	Cancer_Rectum Adenocarcinoma	0.379128	0
262c6c2e-9701-407f-a4c6-fa168ffdc5ea	Cancer_Rectum Adenocarcinoma	0.391847	0
910004d6-0dab-4f34-b677-cd132d38e512	Cancer_Rectum Adenocarcinoma	0.38851	0
0892bb47-ffea-4781-96a8-ca0ec0e47de3	Cancer_Sarcoma	1.54455	0.318447
f6dfe419-a543-495a-b660-2486b720cc89	Cancer_Sarcoma	1.1088	0.1814
7d2af6c3-c121-462c-84cd-93bc6e94adfd	Cancer_Sarcoma	0.288366	0.111243
7c3b8bf6-a1d6-49f6-b050-3f96f33b59d7	Cancer_Sarcoma	1.26699	0.061582
eba887e9-1dfb-489d-8a4b-90967fde8699	Cancer_Sarcoma	2.07283	0.0601992
7d99fbd0-9ef3-4d33-8e9f-02620e1801c7	Cancer_Sarcoma	4.46328	0.0558401
c8e7c79b-8439-4a61-9c14-ef4a4f77bfe7	Cancer_Sarcoma	0.218491	0.0528896
a03264d3-1a01-4c8a-87af-942249213ec5	Cancer_Sarcoma	0.322523	0.0496603
859bbf6f-a492-4bf7-b09a-732514c56f5b	Cancer_Sarcoma	0.570915	0.0234849
923855ef-dc57-434b-979f-109dfcbb3dbf	Cancer_Sarcoma	0	0
5a37788c-a590-44ef-acab-c378f170f48a	Cancer_Sarcoma	0.0816054	0
06e2c5f5-7826-4ea0-a0f5-35c582594981	Cancer_Sarcoma	0.237674	0
bfaa5944-e1cb-41e4-9dab-2faa84fc3896	Cancer_Sarcoma	0.295692	0
20d46665-bc9c-4f42-99ff-577839494ab8	Cancer_Sarcoma	11.664	0
6b61e80e-b51a-4552-b019-18acee879a3d	Cancer_Sarcoma	0.21249	0
35e484c2-4028-44ba-a5c8-0a371c60ef86	Cancer_Sarcoma	2.82327	0
46b247c1-21fa-484b-b487-281e79fdfc93	Cancer_Sarcoma	2.10388	0
e08379c0-63ec-4e1c-ada0-9c2df089035b	Cancer_Sarcoma	1.4675	0
35a794ad-5be9-4795-8c62-fe8a11fb5707	Cancer_Sarcoma	1.68795	0
73d95599-4408-4cae-80f6-f731af323649	Cancer_Sarcoma	0.561219	0
d3e36dba-39e0-48e5-a23f-59dd2b16ba7c	Cancer_Sarcoma	0.322229	0
5418d1dc-5670-4145-88e8-d80f0096a755	Cancer_Sarcoma	0.0836568	0
5818b7fc-9e40-465d-927e-a3029274ad72	Cancer_Sarcoma	0.136764	0
9762a0a6-f30d-42ef-b8a9-d8593b03102e	Cancer_Sarcoma	0.0313377	0
c672b2ca-49b3-457c-98d1-275490ec45c7	Cancer_Skin Cutaneous Melanoma	0.566605	1.47668
22bf1ad3-8fdd-440c-940f-5d2057d76fb8	Cancer_Skin Cutaneous Melanoma	2.50105	1.44436
a50cdac5-77de-4120-bf4e-fa45415e389d	Cancer_Skin Cutaneous Melanoma	0.378892	0.660203
c0cea8dd-ec09-4a7a-903a-5cb5b90251e9	Cancer_Skin Cutaneous Melanoma	0.47453	0.226097
f3d190b8-2c42-4817-9302-b89de91fe57b	Cancer_Skin Cutaneous Melanoma	6.6821	0.172633
877c9d12-b6f9-4072-8a5e-84bd9fe6b7a3	Cancer_Skin Cutaneous Melanoma	4.58854	0.166593
ac9597b0-5532-42db-bdd7-602467253c7a	Cancer_Skin Cutaneous Melanoma	1.20466	0.131371
bc4c6105-32f8-42ce-bf2a-fe51cad16d39	Cancer_Skin Cutaneous Melanoma	1.10356	0.122375
cc5d5afd-8944-41e3-a6a3-26d448fcbb98	Cancer_Skin Cutaneous Melanoma	0.831451	0.0921276
a9ec85e3-5167-4718-a363-e72164c5dc62	Cancer_Skin Cutaneous Melanoma	0.500658	0.0862022
8a6350bf-5b10-420a-a2a5-58f2ab22a29a	Cancer_Skin Cutaneous Melanoma	0.363813	0.0667205
8ca1ceb0-da28-43de-b1df-afadf5360109	Cancer_Skin Cutaneous Melanoma	0.236571	0.0427544
dc0534f8-00cc-43ad-a313-05931d3c7682	Cancer_Skin Cutaneous Melanoma	1.03474	0.0415283
07bea59f-c505-4b38-a096-e16b3109d2ac	Cancer_Skin Cutaneous Melanoma	0.185407	0.032782
b9edac55-24d3-475f-ac6b-68031151b91e	Cancer_Skin Cutaneous Melanoma	1.21343	0.00915334
af77b149-a33d-4d43-a12a-85d3faf97f18	Cancer_Skin Cutaneous Melanoma	0.0921086	0
e63618cf-3da7-4579-936f-809275e194da	Cancer_Skin Cutaneous Melanoma	1.37608	0
daf59398-6beb-41d2-aad4-1b61e81bbb18	Cancer_Skin Cutaneous Melanoma	0.736138	0
8a029484-0321-4f80-a941-37bbb91d41e6	Cancer_Skin Cutaneous Melanoma	0.942767	0
4bcb9553-89a1-43b8-87ed-c734bcaccb42	Cancer_Skin Cutaneous Melanoma	0.195579	0
7920714a-df23-46df-936c-31036c4c4779	Cancer_Skin Cutaneous Melanoma	0.792104	0
c939afec-3899-427b-91aa-badb6843abe6	Cancer_Skin Cutaneous Melanoma	0.270638	0
2968a0ca-b550-40e7-8da5-cf771936f77a	Cancer_Skin Cutaneous Melanoma	0.458359	0
517b7d48-b56f-4669-9ac9-a2ebd38f62c0	Cancer_Skin Cutaneous Melanoma	0.52378	0
148cd32d-a6d9-4114-b1e4-9fa4eab5490d	Cancer_Skin Cutaneous Melanoma_metastatic	4.32467	0.753589
d69fcf07-c38d-49b9-ba4e-3874235446be	Cancer_Skin Cutaneous Melanoma_metastatic	0.793306	0.646525
357ea0d5-9aec-444a-8d2a-4b1e802280b9	Cancer_Skin Cutaneous Melanoma_metastatic	1.81026	0.299835
ff2d4d4f-72c9-4234-8b50-183c0f036040	Cancer_Skin Cutaneous Melanoma_metastatic	8.63519	0.254583
adc13cd8-a9a4-491a-a327-dfe763278960	Cancer_Skin Cutaneous Melanoma_metastatic	1.18228	0.193506
c85c22da-304b-4d5b-9fdd-b82f1daf6414	Cancer_Skin Cutaneous Melanoma_metastatic	5.16846	0.191115
d0830e47-6b02-477f-b281-f641adb1e7f9	Cancer_Skin Cutaneous Melanoma_metastatic	2.13593	0.187875
235d3047-8e62-4fce-be13-592ff0a760e2	Cancer_Skin Cutaneous Melanoma_metastatic	3.04161	0.175824
41d0295e-4d7b-482a-85fe-ed4709765569	Cancer_Skin Cutaneous Melanoma_metastatic	6.26569	0.090582
7125c639-da26-49ca-98ba-3a701def71be	Cancer_Skin Cutaneous Melanoma_metastatic	0.457389	0.0566624
28248d1a-959c-424c-971c-8e92a61c055a	Cancer_Skin Cutaneous Melanoma_metastatic	0.273597	0.047489
eb9b744d-6f74-4aa2-845b-0c48a48be25d	Cancer_Skin Cutaneous Melanoma_metastatic	0.120239	0.0474389
773af3dc-2dc5-42bd-bd06-a5d7edf7717a	Cancer_Skin Cutaneous Melanoma_metastatic	1.11621	0.0458556
8323fd51-84c0-4482-baef-66dd9630db0b	Cancer_Skin Cutaneous Melanoma_metastatic	1.76879	0.0322665
cc487c6b-ff32-47e9-8c15-9cc1bb3b4a09	Cancer_Skin Cutaneous Melanoma_metastatic	0.581768	0.0310639
babe3082-5f9b-4e2c-85b6-0c4c840ed00b	Cancer_Skin Cutaneous Melanoma_metastatic	6.32737	0.0262376
a548fb8d-f3d8-4c08-b271-75605850734d	Cancer_Skin Cutaneous Melanoma_metastatic	1.02553	0
fd8663a5-d30e-47f1-a815-71dbb756a82a	Cancer_Skin Cutaneous Melanoma_metastatic	3.26447	0
f54cca32-81dc-4ab2-a247-b1800871dc1f	Cancer_Skin Cutaneous Melanoma_metastatic	0.779852	0
94d20006-0be7-4edd-aacb-583656348721	Cancer_Skin Cutaneous Melanoma_metastatic	0.264527	0
8969b53f-71dc-44b6-9a6b-c70019632179	Cancer_Skin Cutaneous Melanoma_metastatic	0.571696	0
4f38efeb-7af5-41d0-ad23-b4f015daa3fe	Cancer_Skin Cutaneous Melanoma_metastatic	0.29079	0
e0ce2ceb-c2c2-496b-990c-7aa87ab77956	Cancer_Skin Cutaneous Melanoma_metastatic	4.23724	0
eb658798-d2ec-476d-8ed5-fe2817a5a7c8	Cancer_Skin Cutaneous Melanoma_metastatic	0.0288334	0
15c472e8-dc05-4641-875e-4423ac3aebd9	Cancer_Stomach Adenocarcinoma	5.28293	3.46851
843cd8a0-3838-4cf2-90c5-84e6dd3e67d2	Cancer_Stomach Adenocarcinoma	3.84515	2.8561
b3b169f7-56ec-4011-a1c2-056ec129afae	Cancer_Stomach Adenocarcinoma	3.19492	1.02342
592deef8-4e7a-4664-b9dc-f894e3d79d90	Cancer_Stomach Adenocarcinoma	1.85708	0.616744
d7182b8b-1c35-414d-98c3-2ab62e478da2	Cancer_Stomach Adenocarcinoma	2.56437	0.530518
99c751f5-1a3c-4f69-a4c6-b64afa59608b	Cancer_Stomach Adenocarcinoma	0.801064	0.519521
81413076-f338-4755-9069-5fba54f7be34	Cancer_Stomach Adenocarcinoma	0.788163	0.299898
be76e4de-1d22-4dae-ad8f-b14748104c58	Cancer_Stomach Adenocarcinoma	0.939928	0.295948
47383ff9-3389-4748-999c-66fc5a8c91c6	Cancer_Stomach Adenocarcinoma	0.70582	0.287849
f08808e6-39c9-4f61-9484-997ac54e6b99	Cancer_Stomach Adenocarcinoma	0.693229	0.285825
bb468162-f657-4f73-997f-dcfeda8c96b7	Cancer_Stomach Adenocarcinoma	0.875848	0.222976
cd8e881f-2293-4853-b9bc-d8185b466653	Cancer_Stomach Adenocarcinoma	8.87627	0.216582
8b7fa25b-a830-401b-9ad9-f81b331b93e3	Cancer_Stomach Adenocarcinoma	3.44928	0.163881
c8bcb222-1efb-437f-84ff-fb19dc03fca3	Cancer_Stomach Adenocarcinoma	8.03964	0.138523
2a19bb88-984a-4166-ae8c-07d40cee7867	Cancer_Stomach Adenocarcinoma	0.113648	0.10448
a567d703-8f62-4196-aa8c-02fd5c67c0e2	Cancer_Stomach Adenocarcinoma	6.3644	0.0930328
de1f12f2-ddde-415c-af44-e56a34e8c70a	Cancer_Stomach Adenocarcinoma	1.80583	0.0895221
3987324a-36cb-4d53-a45c-d6ce3bdd5c7d	Cancer_Stomach Adenocarcinoma	0.824455	0.086936
f7a97dca-6f5d-421a-b073-7752552918f8	Cancer_Stomach Adenocarcinoma	0.814686	0.0776714
932374bf-4efb-4233-994f-548aa4e61a24	Cancer_Stomach Adenocarcinoma	0.891304	0.0724429
664bde83-81b9-4daa-9510-d6098d02fe24	Cancer_Stomach Adenocarcinoma	0.851494	0.0624319
5faa4a3d-7cc5-4595-99b8-5eb3bf58d9d4	Cancer_Stomach Adenocarcinoma	0.12286	0.057753
04cb8c69-b41b-4dd1-90b8-7b6f74fc8ef7	Cancer_Stomach Adenocarcinoma	1.67042	0.0320931
5ceeb9a7-d6bf-470a-9bf9-f43cd6dc969a	Cancer_Stomach Adenocarcinoma	0.211304	0
86b88a4c-ba41-47e5-9d81-dbfb8e4a5e8d	Cancer_Testicular Germ Cell Tumors	0.22548	0.238931
f648e318-6a1e-4bf1-a642-3f82b360dc0f	Cancer_Testicular Germ Cell Tumors	1.23825	0.137609
6271f7b2-acc1-4979-90d5-b704e3bef28d	Cancer_Testicular Germ Cell Tumors	0.459761	0.127705
03e3780e-caa3-43f3-9f25-39f3398876e5	Cancer_Testicular Germ Cell Tumors	0.925988	0.125417
c3f19cf6-3503-4cf0-9de9-47ffe8b334d7	Cancer_Testicular Germ Cell Tumors	1.60495	0.0877704
78dac9ee-c140-48ab-bf03-ac69e960314b	Cancer_Testicular Germ Cell Tumors	0.174083	0.0872567
f0c45059-d823-45cd-8413-51c345d2774a	Cancer_Testicular Germ Cell Tumors	0.287261	0.0846829
9368629a-0738-4675-a055-955c3ddd9e64	Cancer_Testicular Germ Cell Tumors	1.37194	0.0730051
ccc77643-a78b-492a-93f3-46a0e6870406	Cancer_Testicular Germ Cell Tumors	0.0559952	0.0712115
b11eb4e4-2d74-4821-82d6-0652d0ee85f6	Cancer_Testicular Germ Cell Tumors	0	0.0578889
a39790e4-d01f-4076-b637-cdb166ac97cb	Cancer_Testicular Germ Cell Tumors	0.803094	0.0447316
65b72d96-b66f-4a8b-8e77-9a21e5e2b57f	Cancer_Testicular Germ Cell Tumors	0.819713	0.0424817
2eee40cb-88fa-4950-98a1-5960662c8525	Cancer_Testicular Germ Cell Tumors	1.71823	0.0347928
92205a5e-4818-4520-8974-9b543a076eff	Cancer_Testicular Germ Cell Tumors	0.912799	0.0313553
98f99c45-19de-47fc-894d-e625d510b51b	Cancer_Testicular Germ Cell Tumors	1.15774	0.0290599
1bc15944-72ca-418f-a097-6d2ad4718298	Cancer_Testicular Germ Cell Tumors	0.235946	0.0128838
de068d67-0ea7-4a44-9d6d-c6659ab95375	Cancer_Testicular Germ Cell Tumors	9.10148	0
44f6ad8a-4e0b-4f84-84a6-58a55fd40264	Cancer_Testicular Germ Cell Tumors	2.37274	0
de4512ba-075c-4916-9162-acb22a261c42	Cancer_Testicular Germ Cell Tumors	1.15024	0
eb3c682e-fb77-4601-9be8-7f56fc4b9521	Cancer_Testicular Germ Cell Tumors	0.714056	0
97ec18b1-048b-4da4-a51e-afedd7af37b2	Cancer_Testicular Germ Cell Tumors	0.832779	0
b256b51f-4660-4176-81fe-7bc266a46640	Cancer_Testicular Germ Cell Tumors	0.398718	0
c73c7f36-71a9-49ca-b240-730a3f396fa4	Cancer_Testicular Germ Cell Tumors	0.097975	0
fc1fd20f-44fe-44a2-928d-ab5cdb1a8465	Cancer_Testicular Germ Cell Tumors	0.0290068	0
00c48efd-3131-4c21-b8b2-2f914a9cfa71	Cancer_Thymoma	3.19677	1.54606
81f5fe45-a52e-4020-b05e-1ea3f43728b8	Cancer_Thymoma	12.4687	0.700141
ee913025-31ef-440d-a480-5a78e2508d35	Cancer_Thymoma	13.5253	0.685873
06e1438a-b7f5-47fb-bc70-131ac60e7381	Cancer_Thymoma	9.91884	0.463992
2d320f7f-69ce-48f0-b36b-84d72474898a	Cancer_Thymoma	9.23758	0.44739
e01df28b-a6bf-4888-8a86-f8f4bcaad278	Cancer_Thymoma	2.02783	0.430665
dc04a2b8-b9b3-46f9-a944-9a820f39d4ae	Cancer_Thymoma	2.91958	0.380552
bcca0ee8-eb01-4f8d-8809-bb8e074fc310	Cancer_Thymoma	8.75827	0.30143
c5370a4b-0f8b-4085-8989-dbf708b5990d	Cancer_Thymoma	4.26384	0.290243
f92bf3c3-3d34-4b42-bd20-03c13f3d42ea	Cancer_Thymoma	0.67969	0.284863
0eedd690-9ce0-46d3-bb0b-2a7d26024aad	Cancer_Thymoma	46.0487	0.234054
be9ee3d0-e5b9-4d78-b5f9-031aef42b1bf	Cancer_Thymoma	14.3071	0.20261
509d24e3-65e2-4b63-9b42-b4b7f9b241eb	Cancer_Thymoma	3.13674	0.139724
8051d910-559e-44f2-b55c-c6df9de8989d	Cancer_Thymoma	1.88588	0.118788
daddefdd-19ce-40f7-8dcc-6a61b9610134	Cancer_Thymoma	1.10157	0.117365
aafbdae7-eb6c-4707-b7c4-854f6b000f1c	Cancer_Thymoma	23.6727	0.108408
5845fe97-971f-4df8-bb72-7f932927af95	Cancer_Thymoma	19.4434	0.0955514
49012b3a-34be-40a2-b124-42ab170449c2	Cancer_Thymoma	0.146754	0.0728748
99c11301-6a16-412a-baec-a27a9da2ecc0	Cancer_Thymoma	2.72449	0.0561919
fceed3dd-2b40-44ca-bcd5-c9f15757413d	Cancer_Thymoma	0.233533	0
0e477832-3473-4af0-85ca-c5ec90902201	Cancer_Thymoma	17.604	0
6fabdaa5-fbe8-4dd5-a34f-adb174a2fbbc	Cancer_Thymoma	2.02852	0
2dc6e174-a6b2-4d57-919f-6bd218e1c0cf	Cancer_Thymoma	5.62426	0
b7edae8a-8185-45c2-b0c5-f7d8fe8520c8	Cancer_Thymoma	10.8704	0
00de478e-0d1c-4aa4-8dcd-193944306227	Cancer_Thyroid Carcinoma	3.15958	0.337755
897d450f-a91e-4aa0-8a48-746044cb69ad	Cancer_Thyroid Carcinoma	0.34089	0.18344
717a37a4-9a1e-48a0-8ee8-2c09101d31b6	Cancer_Thyroid Carcinoma	1.68468	0.174608
3ac8acd9-c9f5-41d9-a9dd-59679af7bbe3	Cancer_Thyroid Carcinoma	1.04327	0.166966
a91d9b3a-69cc-45d0-843f-a62325b8f959	Cancer_Thyroid Carcinoma	7.23783	0.15326
f8162566-19cd-4f78-a624-0248712c3775	Cancer_Thyroid Carcinoma	2.47764	0.118811
53a85137-3601-4d29-8260-be18e12eeb1c	Cancer_Thyroid Carcinoma	1.1606	0.0911199
190cbfa4-cacd-4514-a75c-528861dc627a	Cancer_Thyroid Carcinoma	2.68825	0.0773779
fe914956-686a-4312-9fc3-5de5e52a5b6b	Cancer_Thyroid Carcinoma	1.92488	0.0383733
34875d1e-90fe-4a4f-bde2-f23fdb543640	Cancer_Thyroid Carcinoma	0.61756	0.0351946
d209ecf5-9e64-4002-8a10-1d7a144cad89	Cancer_Thyroid Carcinoma	2.15774	0.0236072
ba975382-fd29-472d-9579-f165f058958f	Cancer_Thyroid Carcinoma	0.116564	0.0228421
e2cd42aa-e9da-4b0c-b994-16fd239ccd60	Cancer_Thyroid Carcinoma	0.776307	0.015645
39b1476f-eba2-47d1-b02e-a4020e30d36b	Cancer_Thyroid Carcinoma	0.234924	0.014224
43f57d90-9d9d-406d-b2af-ab4cb14dcd68	Cancer_Thyroid Carcinoma	0.339457	0.0119761
6deb812e-43d2-4fbd-900c-8c46497a39e3	Cancer_Thyroid Carcinoma	2.21624	0.0110551
5d688768-49ef-4058-9601-f29643d55770	Cancer_Thyroid Carcinoma	0	0.00950056
748816fa-9039-4815-9b5f-b3f924a3c8cc	Cancer_Thyroid Carcinoma	0.778547	0.00933989
11628538-0f96-4898-a2c5-dd09f352cdcd	Cancer_Thyroid Carcinoma	2.36504	0.00769123
304930a9-1722-4768-b270-a0de20339fb9	Cancer_Thyroid Carcinoma	0.748555	2.85e-08
63659984-4b73-4d15-9d14-f3504a92840c	Cancer_Thyroid Carcinoma	1.38285	0
0b65bfd2-1d66-4843-b45d-22e9d3cd752f	Cancer_Thyroid Carcinoma	6.41058	0
71335daa-29aa-4457-acf2-fbf30cab782a	Cancer_Thyroid Carcinoma	0.712	0
7cc8e1f6-de50-406a-a73a-66f16f0a2d8c	Cancer_Thyroid Carcinoma	1.41835	0
09cda1dc-07f3-49e5-bcf3-dfe12e2b1e39	Cancer_Uterine Carcinosarcoma	0	0.166062
da8c25b2-8f3e-4725-9045-0fcc0f529174	Cancer_Uterine Carcinosarcoma	0.721236	0.153127
eaabbb27-50f5-426d-b569-776149922d30	Cancer_Uterine Carcinosarcoma	0.0920354	0.12847
cb5045df-52e7-4377-b157-1d8a8a79b769	Cancer_Uterine Carcinosarcoma	1.27671	0.1104
a61a8b9a-d9cf-46d6-ad60-11d42d51e10a	Cancer_Uterine Carcinosarcoma	0.443444	0.109232
df6f013c-522a-4d90-8de7-c204b486cdd4	Cancer_Uterine Carcinosarcoma	1.60439	0.0722247
c88d1477-73b0-4bf5-84b4-0ecef278a77f	Cancer_Uterine Carcinosarcoma	0.394788	0.071002
1fe2a448-2f97-4b61-93cc-7f24609c95e5	Cancer_Uterine Carcinosarcoma	0.43538	0.0630345
ff457981-e542-4a26-beb9-069d23cb0d86	Cancer_Uterine Carcinosarcoma	0.106169	0.0628539
dc2a639b-f96f-4223-83d9-c708b4abb92f	Cancer_Uterine Carcinosarcoma	0.0766503	0.0483488
288dc474-1187-43d4-8917-c9179840f1bc	Cancer_Uterine Carcinosarcoma	0.0544157	0.0226711
c2db4fbc-ed58-4808-8974-bebd5cabc8a2	Cancer_Uterine Carcinosarcoma	0.183735	0
e73ca9b2-60eb-4e9f-bb21-b167c5239a3e	Cancer_Uterine Carcinosarcoma	0.176659	0
22364f70-2308-4cd0-9ae7-16aac8c24000	Cancer_Uterine Carcinosarcoma	0.180573	0
b3b78a8f-54ad-405d-bcd9-fad26f2f7c74	Cancer_Uterine Carcinosarcoma	0.414935	0
3859c6d6-f1d4-470f-baaa-d4de5b30b28b	Cancer_Uterine Carcinosarcoma	0.329602	0
1d9a503e-5bfb-4fae-8c9a-d3a5658a3c2d	Cancer_Uterine Carcinosarcoma	0.226802	0
b71af913-2d1c-4f56-91f7-ab2b267dc2d0	Cancer_Uterine Carcinosarcoma	0.492335	0
b9a66fc7-e343-4b2a-b59a-ff8407b2bc30	Cancer_Uterine Carcinosarcoma	0	0
d89ec098-eba2-4ba5-9bea-9ee73a3eb972	Cancer_Uterine Carcinosarcoma	0.300633	0
0a2b4bd1-18f6-426e-a622-72920766253d	Cancer_Uterine Carcinosarcoma	0.0688052	0
4750e2f3-ff15-4bb3-a0a6-c7aa6ef15fb7	Cancer_Uterine Carcinosarcoma	0.123084	0
590affbb-453e-4f2e-8ef6-d4802e9f742c	Cancer_Uterine Carcinosarcoma	0.116428	0
6fc392c6-2a04-43f8-b457-fec10cf8de07	Cancer_Uterine Carcinosarcoma	0.0681599	0
0976e33a-1f76-4a15-b7e3-0133813051ab	Cancer_Uterine Corpus Endometrial Carcinoma	8.38707	2.73443
2ea070ae-18f4-4143-be3a-1e3eaf702b6d	Cancer_Uterine Corpus Endometrial Carcinoma	1.6377	0.237911
3b77539f-0798-432a-bb31-443aed3b2bde	Cancer_Uterine Corpus Endometrial Carcinoma	0.546911	0.177765
18c52fe6-5cb0-4e59-91a2-e9845c0527c6	Cancer_Uterine Corpus Endometrial Carcinoma	0.371343	0.129212
fefc8873-7998-4f6c-b596-8fe1538d5093	Cancer_Uterine Corpus Endometrial Carcinoma	2.98197	0.124618
1f47581c-d63f-461d-8606-82939f2d62ae	Cancer_Uterine Corpus Endometrial Carcinoma	0	0.114099
cba79c02-69e6-44eb-aa0a-685734266861	Cancer_Uterine Corpus Endometrial Carcinoma	0.692348	0.103948
ff3250a6-6d94-4033-8bb0-8d90f03a9257	Cancer_Uterine Corpus Endometrial Carcinoma	0.218783	0.0768115
33629d84-b1e8-485b-a61f-c0700c36ab7f	Cancer_Uterine Corpus Endometrial Carcinoma	0.156598	0.0588265
6668d6f0-4c83-4f02-afc2-b7a5ded3eab9	Cancer_Uterine Corpus Endometrial Carcinoma	0.78681	0.0557671
74ad14a3-1771-4ba8-9e37-e371784f4c8f	Cancer_Uterine Corpus Endometrial Carcinoma	0.935534	0.052347
a898fd8f-e063-4e1b-b850-260e1f7d660c	Cancer_Uterine Corpus Endometrial Carcinoma	1.11789	0.050257
b25cd4ba-3f67-41c7-b00f-174cf1b99f40	Cancer_Uterine Corpus Endometrial Carcinoma	0.417218	0.0423094
983ce71e-50b8-4b47-8120-526f44a4e726	Cancer_Uterine Corpus Endometrial Carcinoma	1.26583	0.0319448
82a76141-1c0e-4045-a1e8-a71dc6da0e40	Cancer_Uterine Corpus Endometrial Carcinoma	0.308006	0.0291154
f652ec8a-432e-4adb-95e4-69b2a82253fe	Cancer_Uterine Corpus Endometrial Carcinoma	0.26902	0.0105403
bd93c6fe-d81b-43f6-8eaa-0e019a8cc1c9	Cancer_Uterine Corpus Endometrial Carcinoma	0.116693	0.00258764
23a1ea74-f82f-410c-b4c0-645301727f1d	Cancer_Uterine Corpus Endometrial Carcinoma	0.0377619	0
e4927137-257e-4971-a82c-5cd6eb711375	Cancer_Uterine Corpus Endometrial Carcinoma	0	0
51225a41-58b2-4f7d-ab31-d866dcac3c72	Cancer_Uterine Corpus Endometrial Carcinoma	0.331669	0
227a3805-19ea-447e-8c8c-b4b7971606a1	Cancer_Uterine Corpus Endometrial Carcinoma	0.238641	0
125b4203-3b31-41c1-a8df-cf9d879ab352	Cancer_Uterine Corpus Endometrial Carcinoma	0.110352	0
3f4dc762-27a9-43d2-9f8c-5407a65d8c27	Cancer_Uterine Corpus Endometrial Carcinoma	0.225668	0
57ee9ee6-af9a-4e16-acba-4ca5db1bc93a	Cancer_Uterine Corpus Endometrial Carcinoma	0.146342	0
b37d35cb-c9f4-407d-8988-e6b6ffc43ce1	Cancer_Uveal Melanoma	2.25482	0.237421
4d78b46c-127b-4d9e-a308-0b0bb9d680f9	Cancer_Uveal Melanoma	1.18723	0.217028
e7b513d3-a251-49fe-a06a-a2642ff77f65	Cancer_Uveal Melanoma	0.0376547	0.0894036
ac6e67a3-d0d0-41c5-b74e-4cd4c22c04f0	Cancer_Uveal Melanoma	0.66287	0.0832038
5924f40c-571a-4a87-8c8f-60ac90a85600	Cancer_Uveal Melanoma	0.317569	0.0791436
80e5718d-3a3c-4bb4-a5c3-634b78810b2f	Cancer_Uveal Melanoma	0.271459	0.0430177
e8021913-3dc5-4bee-92ce-4c990ef46f30	Cancer_Uveal Melanoma	0.582999	0.0401237
b783ea3a-480f-4a16-b4cc-3bff24bcc159	Cancer_Uveal Melanoma	1.46613	0.0331904
c2ee73ed-a06c-437f-abb7-94aafdb606ec	Cancer_Uveal Melanoma	0.581829	0.0201834
8d79739a-c20d-4458-b99a-b518a39bfadb	Cancer_Uveal Melanoma	0.556114	0.00693812
1084c723-1f84-4088-ab93-ad02e2f18a04	Cancer_Uveal Melanoma	0.465744	0
8c913ce7-992d-4ede-bb7c-4dfb9b38ec02	Cancer_Uveal Melanoma	0.493228	0
589902c7-7c0f-48bd-a2db-4ec14acc308a	Cancer_Uveal Melanoma	0.103295	0
8327c561-9a8c-40de-9ce4-b21227433b0d	Cancer_Uveal Melanoma	0.214613	0
a6f48ba2-ffd8-4e8b-b500-e5528402c835	Cancer_Uveal Melanoma	0.392368	0
b071386e-c195-40a0-a6e6-c93bda019c49	Cancer_Uveal Melanoma	0.113918	0
56c78ad1-d1e3-41cb-a335-3880dde784a1	Cancer_Uveal Melanoma	0.569458	0
5e554716-fa3f-4c48-b7a4-4d70dbdab96f	Cancer_Uveal Melanoma	0.462203	0
61f02a4e-6aa3-455f-be4a-567aee1b14c4	Cancer_Uveal Melanoma	0.135113	0
6d5d3517-85e9-4bf7-9722-cb42fab73c74	Cancer_Uveal Melanoma	0.291324	0
8120173e-e0ad-4722-969b-482253b563cc	Cancer_Uveal Melanoma	0.142252	0
8afe9207-1e5c-45a3-9582-0c51e2398e8f	Cancer_Uveal Melanoma	0.266466	0
e08ea2d7-866b-41f6-bedc-0471a7e756a2	Cancer_Uveal Melanoma	0.152408	0
f7e766d8-54e9-4018-8d4e-7d482d24dafa	Cancer_Uveal Melanoma	0.368235	0
SRR1309248	Normal_Adipose Tissue	1.4046	0.281948
SRR1315165	Normal_Adipose Tissue	0.565411	0.104285
SRR1397366	Normal_Adipose Tissue	0.707453	0.068889
SRR1398074	Normal_Adipose Tissue	0.131966	0.0577134
SRR1485830	Normal_Adipose Tissue	6.3e-05	0.0260025
SRR661108	Normal_Adipose Tissue	1.07316	0
SRR1455038	Normal_Adipose Tissue	0.5769	0
SRR810295	Normal_Adipose Tissue	1.78923	0
SRR1500472	Normal_Adipose Tissue	4.54624	0
SRR1099096	Normal_Adipose Tissue	1.45969	0
SRR1404909	Normal_Adipose Tissue	2.82026	0
SRR1333395	Normal_Adipose Tissue	1.85117	0
SRR1433392	Normal_Adipose Tissue	0.705094	0
SRR1346773	Normal_Adipose Tissue	1.91472	0
SRR1442464	Normal_Adipose Tissue	0.612106	0
SRR1408393	Normal_Adipose Tissue	3.20141	0
SRR1094457	Normal_Adipose Tissue	0.977294	0
SRR1081209	Normal_Adipose Tissue	1.35374	0
SRR1360695	Normal_Adipose Tissue	0.352851	0
SRR1414139	Normal_Adipose Tissue	0.562269	0
SRR1377423	Normal_Adipose Tissue	0.363431	0
SRR1323577	Normal_Adipose Tissue	0.287368	0
SRR665310	Normal_Adipose Tissue	0.954246	0
SRR1329027	Normal_Adipose Tissue	0.562671	0
SRR1341854	Normal_Adrenal Gland	0.227744	0.156666
SRR1319363	Normal_Adrenal Gland	0.311539	0.0999232
SRR1310231	Normal_Adrenal Gland	0.167704	0.0986307
SRR1479977	Normal_Adrenal Gland	0.418036	0.0730699
SRR1320536	Normal_Adrenal Gland	0.0349908	0.0651464
SRR1392525	Normal_Adrenal Gland	0.319985	0.0445852
SRR1400141	Normal_Adrenal Gland	0.151584	0.0142479
SRR1469369	Normal_Adrenal Gland	0.51937	0
2b2c3838-979e-48fd-869f-4a9b27174bc0	Normal_Adrenal Gland	0.552881	0
SRR1485563	Normal_Adrenal Gland	0.423991	0
SRR1445111	Normal_Adrenal Gland	0.557256	0
bb07f902-6195-45ef-88f8-71152a5b4da2	Normal_Adrenal Gland	0.291455	0
153dc161-0e70-454a-b5a6-ebeef2de5c0a	Normal_Adrenal Gland	0.268555	0
SRR1480831	Normal_Adrenal Gland	0.344954	0
SRR1083824	Normal_Adrenal Gland	0.223961	0
4b47bbc4-bf80-4023-b08a-2e87e77e5240	Normal_Bile Duct	0.32513	0.0546177
9301c714-df7f-47f2-a604-aabfc3822755	Normal_Bile Duct	0.121245	0
98d86abb-a31a-431b-ae3d-33c3d4578a49	Normal_Bile Duct	0.335234	0
fecb2745-9c20-45f7-9727-392f7a6e1a10	Normal_Bile Duct	0.622799	0
d38f0064-13b5-47dd-b3aa-aa2d1504abc5	Normal_Bile Duct	0.304859	0
ca79b8b7-ba3e-42de-a3b4-c7b624b6864a	Normal_Bile Duct	0.227836	0
f1eaca04-417c-493d-b3e1-bc8ead325651	Normal_Bile Duct	0.392542	0
8d017067-46a2-4cb8-8d99-25363eea9abb	Normal_Bile Duct	0.11947	0
d46e6479-edde-46c1-a521-2b4bb6844530	Normal_Bile Duct	0.140762	0
76b9e5f3-e28c-4de0-b1f1-83c6ae661377	Normal_Bladder	1.03449	0.225413
06cd399b-c3d5-44fc-b0be-f3fe0b866efd	Normal_Bladder	1.57207	0.157149
SRR1084917	Normal_Bladder	0.114604	0.108352
928d1283-70e7-438e-a30e-18225b7db8e1	Normal_Bladder	1.18331	0.064975
c89fc750-8eb8-4734-af48-4e19ed8960e2	Normal_Bladder	2.0028	0.049794
SRR1099957	Normal_Bladder	0.300731	0
SRR1120296	Normal_Bladder	1.84224	0
69dbcbec-c889-43d8-ba6d-8ff52642168c	Normal_Bladder	4.68715	0
SRR1097296	Normal_Bladder	0.571609	0
SRR1079830	Normal_Bladder	0.589717	0
9c2445fd-9d85-4505-8655-fae28c5b7afa	Normal_Bladder	0.289679	0
SRR1086236	Normal_Bladder	0.341271	0
SRR1093930	Normal_Bladder	0.524345	0
SRR1085402	Normal_Bladder	1.22618	0
SRR1081765	Normal_Bladder	0.605294	0
SRR1071717	Normal_Bladder	0.740383	0
SRR1092208	Normal_Bladder	0.242285	0
2a92b31c-23ef-4fd8-922d-bb8660a121dc	Normal_Bladder	1.57645	0
a36eacf8-9bfc-4d07-a013-927588fbe18c	Normal_Bladder	0.925383	0
18f43819-4f21-4dd0-b626-adf636bd685f	Normal_Bladder	0.763396	0
74873f93-be1a-433c-897d-b29acb80fea6	Normal_Bladder	0.79609	0
8f02d3d3-8306-4f9e-82a7-20e569c1ddcc	Normal_Bladder	0.268409	0
SRR1105369	Normal_Blood	47.1253	2.42506
SRR1333330	Normal_Blood	15.7803	1.07751
SRR1469169	Normal_Blood	12.8473	0.981027
SRR1367432	Normal_Blood	2.68209	0.845275
SRR809259	Normal_Blood	18.0875	0.844656
SRR1356397	Normal_Blood	37.242	0.695387
SRR816945	Normal_Blood	48.3244	0.559714
SRR1091918	Normal_Blood	18.4023	0.495782
SRR815637	Normal_Blood	29.2903	0.224564
SRR1379133	Normal_Blood	18.4112	0.166013
SRR1392547	Normal_Blood	0.91337	0.12143
SRR1487089	Normal_Blood	0.7262	0.109871
SRR1400054	Normal_Blood	0.62854	0.0919706
SRR1351166	Normal_Blood	0.0854742	0.0209313
SRR659295	Normal_Blood	0.00468104	0.012396
SRR1341164	Normal_Blood	0.132442	0.0109695
SRR598172	Normal_Blood	0.229087	0.000509324
SRR814679	Normal_Blood	14.4337	0
SRR1086585	Normal_Blood	14.0678	0
SRR1489862	Normal_Blood	30.1398	0
SRR2164650	Normal_Blood	1.18596	0
SRR1356248	Normal_Blood	1.69514	0
SRR601038	Normal_Blood	0.321597	0
SRR1465018	Normal_Blood	0.00421147	0
SRR1384258	Normal_Blood Vessel	1.34823	0.1994
SRR1353136	Normal_Blood Vessel	1.577	0.15669
SRR1487993	Normal_Blood Vessel	0.561903	0.152794
SRR1102680	Normal_Blood Vessel	3.75548	0.13938
SRR1465587	Normal_Blood Vessel	1.60664	0.135304
SRR1392835	Normal_Blood Vessel	0.775303	0.132572
SRR1466709	Normal_Blood Vessel	0.337349	0.0633715
SRR1351521	Normal_Blood Vessel	0.486443	0.0602021
SRR812625	Normal_Blood Vessel	0.657623	0.0572169
SRR1435982	Normal_Blood Vessel	0.395941	0.0502352
SRR1384754	Normal_Blood Vessel	0.972545	0
SRR1456114	Normal_Blood Vessel	1.12025	0
SRR656758	Normal_Blood Vessel	0.558161	0
SRR1476863	Normal_Blood Vessel	1.02883	0
SRR1395857	Normal_Blood Vessel	0.332302	0
SRR1102443	Normal_Blood Vessel	1.16912	0
SRR1315739	Normal_Blood Vessel	0.264972	0
SRR1403072	Normal_Blood Vessel	1.0336	0
SRR1072948	Normal_Blood Vessel	0.710084	0
SRR1096149	Normal_Blood Vessel	0.817118	0
SRR1446050	Normal_Blood Vessel	1.16087	0
SRR1488388	Normal_Blood Vessel	1.55947	0
SRR1319520	Normal_Blood Vessel	1.77196	0
SRR1443161	Normal_Blood Vessel	1.29195	0
SRR1397971	Normal_Blood Vessel	1.68625	0
SRR1380952	Normal_Blood Vessel	1.59752	0
SRR1359803	Normal_Blood Vessel	1.76806	0
SRR1407386	Normal_Blood Vessel	1.2661	0
SRR1486698	Normal_Blood Vessel	0.638655	0
SRR1081473	Normal_Blood Vessel	1.2595	0
SRR655301	Normal_Blood Vessel	1.11647	0
SRR1479014	Normal_Blood Vessel	0.79327	0
SRR1337302	Normal_Blood Vessel	0.21369	0
SRR1498885	Normal_Blood Vessel	0.797321	0
SRR1337155	Normal_Blood Vessel	0.631085	0
SRR1311833	Normal_Blood Vessel	0.224989	0
SRR665670	Normal_Brain	0.422845	0.244791
SRR820518	Normal_Brain	2.38972	0.211687
SRR656516	Normal_Brain	0.0211825	0.177423
SRR1337098	Normal_Brain	1.12379	0.1263
SRR819346	Normal_Brain	10.8419	0.117547
SRR1315019	Normal_Brain	0.49068	0.0963822
SRR660638	Normal_Brain	0.92091	0.0963756
SRR1360563	Normal_Brain	0.208756	0.0798017
SRR1360128	Normal_Brain	0.532206	0.074508
SRR1328919	Normal_Brain	0.26474	0.0740984
SRR1436444	Normal_Brain	0.19388	0.0711072
SRR821602	Normal_Brain	0	0.0693161
SRR1331751	Normal_Brain	0	0.0595279
SRR1489502	Normal_Brain	0.234622	0.0566451
SRR1310008	Normal_Brain	0.259354	0.0525159
SRR1472394	Normal_Brain	0.273778	0.052088
SRR1383633	Normal_Brain	0.453528	0.0469336
SRR1319837	Normal_Brain	1.13249	0.0468545
SRR602540	Normal_Brain	0.237772	0.0461514
SRR817856	Normal_Brain	0.32134	0.0388853
SRR1356036	Normal_Brain	2.05596	0.0348271
SRR608002	Normal_Brain	0.927642	0.0343625
SRR627462	Normal_Brain	0.0648996	0.0307703
SRR1341763	Normal_Brain	0.247136	0.0255359
SRR1473936	Normal_Brain	1.05574	0.0245323
SRR1491293	Normal_Brain	0.0955957	0.0229586
SRR1352554	Normal_Brain	0	0.0212822
SRR1336006	Normal_Brain	0.259366	0.0163313
SRR1382956	Normal_Brain	0.0243963	0.0146467
SRR1453932	Normal_Brain	0	0.0132667
SRR660330	Normal_Brain	0.577303	0.0125116
SRR1330546	Normal_Brain	0	0.00998492
SRR1387989	Normal_Brain	0	0.00868705
SRR819370	Normal_Brain	0.632945	0.00516439
SRR1355635	Normal_Brain	0.126572	0.00470528
SRR613270	Normal_Brain	0.292935	0
SRR1318426	Normal_Brain	0.118591	0
SRR660103	Normal_Brain	0	0
SRR1339218	Normal_Brain	0.865529	0
SRR608574	Normal_Brain	3.26669	0
SRR1331597	Normal_Brain	0.551995	0
SRR654874	Normal_Brain	0	0
SRR1367870	Normal_Brain	0.528386	0
SRR1354446	Normal_Brain	0.676419	0
SRR1453851	Normal_Brain	0.22667	0
SRR602598	Normal_Brain	0	0
SRR1375616	Normal_Brain	0	0
SRR1359192	Normal_Brain	0.738368	0
SRR1312743	Normal_Brain	0.130634	0
SRR1375976	Normal_Brain	0.197695	0
SRR1459033	Normal_Brain	0.427256	0
SRR1367128	Normal_Brain	0.0683646	0
SRR1440058	Normal_Brain	0.0245903	0
SRR1485789	Normal_Brain	0	0
SRR607311	Normal_Brain	1.1665	0
SRR817190	Normal_Brain	0	0
SRR1499442	Normal_Brain	0.103303	0
SRR1390582	Normal_Brain	0	0
SRR1335029	Normal_Brain	0.0884886	0
SRR657325	Normal_Brain	0	0
SRR662570	Normal_Brain	0.0827824	0
SRR656179	Normal_Brain	1.7438	0
SRR1343115	Normal_Brain	0.344191	0
SRR1375271	Normal_Brain	0.173922	0
SRR812012	Normal_Brain	0.0919022	0
SRR1457221	Normal_Brain	0.126938	0
SRR1447393	Normal_Brain	0.30809	0
SRR1381566	Normal_Brain	0.18457	0
SRR1337864	Normal_Brain	0.0829027	0
SRR1320180	Normal_Brain	0.266118	0
SRR658129	Normal_Brain	0.505709	0
SRR1489821	Normal_Brain	0.432926	0
SRR1455060	Normal_Brain	0.272244	0
SRR1329885	Normal_Brain	0.265244	0
SRR1364739	Normal_Brain	0.274012	0
SRR1370262	Normal_Brain	0.14026	0
SRR659602	Normal_Brain	0.293	0
SRR1465337	Normal_Brain	0.156976	0
SRR1360718	Normal_Brain	5.10385	0
SRR1388504	Normal_Brain	0.322504	0
SRR1442356	Normal_Brain	0.157595	0
SRR1451897	Normal_Brain	0.932278	0
SRR1323196	Normal_Brain	1.5825	0
SRR1453214	Normal_Brain	0.210019	0
SRR1465356	Normal_Brain	0.476836	0
SRR661255	Normal_Brain	0.234725	0
SRR1477773	Normal_Brain	0.423632	0
SRR1323603	Normal_Brain	0.518503	0
SRR1486304	Normal_Brain	0.284182	0
SRR1073755	Normal_Brain	0.423983	0
SRR1469904	Normal_Brain	0.392676	0
SRR1085015	Normal_Brain	0.50046	0
SRR1376597	Normal_Brain	0.138752	0
SRR598862	Normal_Brain	0.45867	0
SRR661973	Normal_Brain	0.934927	0
SRR1329334	Normal_Brain	1.53338	0
SRR661179	Normal_Brain	1.36422	0
SRR1401295	Normal_Brain	0.0774164	0
SRR599192	Normal_Brain	0.676393	0
SRR1475609	Normal_Brain	0.267284	0
SRR1333767	Normal_Brain	0.0785462	0
SRR1406976	Normal_Brain	1.10283	0
SRR810319	Normal_Brain	0.345283	0
SRR1444580	Normal_Brain	0.121969	0
SRR601787	Normal_Brain	0.384341	0
SRR1382570	Normal_Brain	0.21941	0
SRR1348339	Normal_Brain	0.193444	0
SRR1362219	Normal_Brain	0.727911	0
SRR1336660	Normal_Brain	0.434052	0
SRR656552	Normal_Brain	0.360887	0
SRR1471943	Normal_Brain	0.706173	0
SRR661290	Normal_Brain	0.208329	0
SRR665334	Normal_Brain	0.580431	0
SRR815232	Normal_Brain	0.103288	0
SRR1374414	Normal_Brain	0.353353	0
SRR1348424	Normal_Brain	0.217747	0
SRR1359649	Normal_Brain	0.315455	0
SRR1420493	Normal_Brain	1.1194	0
SRR655111	Normal_Brain	0.864697	0
SRR614455	Normal_Brain	0.662257	0
SRR1329761	Normal_Brain	0.284359	0
SRR601287	Normal_Brain	0.276988	0
SRR1332048	Normal_Brain	0.0826243	0
SRR1474951	Normal_Brain	0.220354	0
SRR1455171	Normal_Brain	0.363756	0
SRR656564	Normal_Brain	0.241266	0
SRR1464411	Normal_Brain	0.102922	0
SRR1367943	Normal_Brain	0.419251	0
SRR1346670	Normal_Brain	0.922122	0
SRR1440699	Normal_Brain	0.201987	0
SRR1499630	Normal_Brain	0.304369	0
SRR1078347	Normal_Brain	0.187499	0
SRR1336379	Normal_Brain	0.0844688	0
SRR659013	Normal_Brain	1.23964	0
SRR1359123	Normal_Brain	0.300464	0
SRR1365828	Normal_Brain	0.423924	0
SRR1439873	Normal_Brain	0.238019	0
SRR1338584	Normal_Brain	0.308147	0
SRR615934	Normal_Brain	0.270593	0
SRR818418	Normal_Brain	0.297802	0
SRR658977	Normal_Brain	0.053095	0
SRR1315269	Normal_Brain	0.0509445	0
SRR1429329	Normal_Brain	0.262913	0
SRR602169	Normal_Brain	0.400318	0
SRR1473733	Normal_Brain	0.326259	0
SRR1440246	Normal_Brain	0	0
SRR1310623	Normal_Brain	0.139739	0
SRR1338323	Normal_Brain	0	0
SRR1410656	Normal_Brain	0.221215	0
SRR1370240	Normal_Brain	0.0546119	0
SRR1316940	Normal_Brain	0.0246318	0
SRR1333352	Normal_Brain	0.165921	0
SRR1421305	Normal_Brain	0.162207	0
SRR1457551	Normal_Brain	0.0258797	0
SRR602131	Normal_Brain	0	0
SRR660661	Normal_Brain	0	0
caa76ec4-022c-44b9-b3e3-49596f77aebc	Normal_Breast	0.879946	0.109741
2f73cb19-5e2c-4c90-8c69-9f1c4c50758f	Normal_Breast	0.388347	0.0539584
SRR1418729	Normal_Breast	0.347736	0.0187644
SRR1368050	Normal_Breast	0.751614	0.0147731
1e955781-abdf-4592-9e1d-f15f3688e5a0	Normal_Breast	1.05622	0.0129541
SRR1457705	Normal_Breast	1.29415	0.0110589
1ccf9a6b-93c2-4abc-a5a8-317b54b25c7d	Normal_Breast	0.81631	0.00739665
c4c4f34c-5c96-4842-87b3-012fb6fa4240	Normal_Breast	0.74202	0.00436121
f926fddb-359a-4968-b49c-d2e25ca1e1fd	Normal_Breast	0.574586	0.00425206
a3dc3ba3-bc6c-4f1f-b077-c11c6ea5003f	Normal_Breast	1.2004	0
SRR1475408	Normal_Breast	2.3783	0
SRR1096987	Normal_Breast	0.83925	0
SRR660248	Normal_Breast	1.13008	0
SRR656911	Normal_Breast	0.592074	0
4c0fd02d-c495-49c4-b052-629c65fb3c3d	Normal_Breast	2.42161	0
SRR1420296	Normal_Breast	1.07547	0
SRR1437073	Normal_Breast	0.840824	0
SRR1486457	Normal_Breast	2.09866	0
SRR1083052	Normal_Breast	0.795103	0
SRR1472102	Normal_Breast	0.531638	0
8e733362-c90f-406b-ba70-1c65a610b3ee	Normal_Breast	1.00303	0
7d0e05d8-54f2-456f-9a9e-7f4ef582c377	Normal_Breast	0.292045	0
242c5c4c-1c4d-4014-bf2b-ead30ca94f3b	Normal_Breast	0.649509	0
04732300-a896-4c46-9c59-43b84ea93315	Normal_Breast	0.790205	0
SRR1075223	Normal_Cervix	0.366397	0.176002
SRR1077239	Normal_Cervix	0.870691	0.0526528
SRR1097035	Normal_Cervix	0.321533	0.0365425
SRR1343393	Normal_Cervix	0.514871	0.0316165
SRR1098612	Normal_Cervix	0.798021	0
SRR1097574	Normal_Cervix	1.79065	0
SRR1089833	Normal_Cervix	1.01482	0
SRR1088832	Normal_Cervix	0.545012	0
SRR1096876	Normal_Cervix	1.16943	0
SRR1089562	Normal_Cervix	1.5015	0
SRR1096057	Normal_Cervix	1.94196	0
983ffcc8-f07e-4d2b-97a7-ad21f99080f9	Normal_Cervix	0.721947	0
d42c0e45-1550-46c8-837a-d74b919deb31	Normal_Cervix	0.628092	0
5d4192d6-2d6d-42f6-8e13-d9bf020140be	Normal_Cervix	0.379503	0
7f89b77a-72c8-4eb6-9cf2-b23ec7984d73	Normal_Colorectal	0.613474	0.189228
SRR1102198	Normal_Colorectal	0.301867	0.120484
SRR1073899	Normal_Colorectal	0.615737	0.0835379
b7189b15-e91f-424c-b69b-95dce9a07d9c	Normal_Colorectal	0.99892	0.0713551
4a0b9aed-3e7c-4b5a-a123-8e0703094345	Normal_Colorectal	0.380485	0.0607884
2e12a83d-7346-4e1c-86aa-ac5c2393b9fa	Normal_Colorectal	1.5909	0.0595343
SRR1120733	Normal_Colorectal	0	0.0436714
111b5c3a-9fb5-4ea9-8222-fb972a47abd4	Normal_Colorectal	1.05257	0.029978
ab445101-1def-4fe7-9f15-77771a34101d	Normal_Colorectal	0.373228	0.0189249
458a3321-b0e6-4ad9-ac15-c66d4273ac1c	Normal_Colorectal	0.76785	0.0130263
SRR1321377	Normal_Colorectal	0.569304	0
07c4bc1c-6f14-4569-9d59-c6e2ce371b91	Normal_Colorectal	0.362812	0
SRR1479370	Normal_Colorectal	0.432095	0
SRR1409326	Normal_Colorectal	0.552893	0
SRR1349190	Normal_Colorectal	0.525457	0
0a9a59e2-65f1-47dc-a4a0-a8569d1b8eb4	Normal_Colorectal	0.568582	0
3ea4eb1b-812d-414d-bbc1-3051b89b0b45	Normal_Colorectal	0.476993	0
SRR1388722	Normal_Colorectal	0.00371581	0
SRR1383674	Normal_Colorectal	0.593678	0
SRR1338280	Normal_Colorectal	0.40664	0
SRR1075729	Normal_Colorectal	0.711873	0
SRR1393529	Normal_Colorectal	0.535063	0
SRR1077380	Normal_Colorectal	0.157331	0
a19b9218-8c81-45cf-ad38-676c10808d70	Normal_Colorectal	0.785509	0
SRR1399291	Normal_Colorectal	0.22571	0
SRR1466770	Normal_Colorectal	0.541879	0
SRR1407693	Normal_Colorectal	0.172882	0
SRR1420413	Normal_Colorectal	1.14591	0
SRR1432783	Normal_Colorectal	0.218285	0
511336f1-e7fd-40fa-a4ed-df3730076095	Normal_Colorectal	1.98839	0
8127208d-6aac-46de-a96a-ad3879d8fa42	Normal_Colorectal	0.561427	0
SRR1083678	Normal_Colorectal	0.456497	0
SRR1353118	Normal_Colorectal	0.171432	0
SRR1444701	Normal_Colorectal	0.231409	0
46322c2e-a3d7-46cf-8107-6dec35a66689	Normal_Colorectal	0.500059	0
37360ffa-7634-4e12-87e1-cd1b50b2b0e3	Normal_Colorectal	0.741227	0
SRR1340966	Normal_Colorectal	0.26867	0
9588a53e-ad2f-4f09-b94f-23f7a5a47b2b	Normal_Colorectal	0.597601	0
78f35f00-e807-43dc-8fe4-98bcee7fd6ae	Normal_Colorectal	0.567619	0
4fc3df78-d758-4926-b501-0edbf5e7ddb7	Normal_Colorectal	0.549795	0
SRR1437514	Normal_Colorectal	0.313944	0
SRR1084505	Normal_Colorectal	0	0
dccd7b9a-b12d-491d-812c-8ba41a787612	Normal_Esophagus	0.603048	0.4751
cb8bef0c-012a-4eb2-8583-edd2d6cba8d6	Normal_Esophagus	0.967706	0.195418
SRR1456674	Normal_Esophagus	0.478437	0.155489
SRR1487255	Normal_Esophagus	0.525857	0.109248
SRR1321744	Normal_Esophagus	0.223568	0.068511
SRR1414016	Normal_Esophagus	0.613753	0.0640288
962f2a4f-94ff-4c7c-b90a-831cf27900fe	Normal_Esophagus	0.0787294	0.0495833
SRR1469769	Normal_Esophagus	0.213894	0.0490715
SRR1321591	Normal_Esophagus	0.244788	0.0389752
SRR1096267	Normal_Esophagus	0.276647	0.03029
SRR1323470	Normal_Esophagus	0.294131	0.0212341
SRR1434161	Normal_Esophagus	0.451804	0.0210491
37339a90-2406-4dd9-af4d-d701df7e9b1d	Normal_Esophagus	0.133694	0.0098307
SRR1415615	Normal_Esophagus	0.445973	0.00702605
241a9e1b-3f1a-4eca-90be-d5d48fedce6d	Normal_Esophagus	0.915673	0.00374581
93c095f7-60d5-4ef8-8807-06fa4eb5e06b	Normal_Esophagus	0.208653	0.00306091
SRR1392922	Normal_Esophagus	0.349875	0
d9a7ae54-cd1c-4b9a-a86e-1dfa19e90351	Normal_Esophagus	0.47955	0
4dc12fc9-ec5c-4a7c-8c65-404c5a8737ff	Normal_Esophagus	0.193677	0
SRR1096432	Normal_Esophagus	0.639536	0
4a644bab-fe70-450d-a055-d007c6495ff8	Normal_Esophagus	0.904332	0
SRR1418183	Normal_Esophagus	0.475606	0
SRR1084742	Normal_Esophagus	0.232268	0
SRR1087127	Normal_Esophagus	1.26402	0
SRR1445023	Normal_Esophagus	0.234874	0
SRR1414708	Normal_Esophagus	0.468811	0
SRR1474374	Normal_Esophagus	0.361971	0
SRR1099144	Normal_Esophagus	3.18e-09	0
SRR1359565	Normal_Esophagus	0.602849	0
SRR1375394	Normal_Esophagus	0.257495	0
SRR1089078	Normal_Esophagus	0.425742	0
SRR1097954	Normal_Esophagus	0.518358	0
SRR1080648	Normal_Esophagus	0.326103	0
SRR1416025	Normal_Esophagus	0.813706	0
SRR1355554	Normal_Esophagus	0.943456	0
SRR1441934	Normal_Esophagus	0.765564	0
SRR813505	Normal_Esophagus	0.336664	0
SRR1416207	Normal_Esophagus	0.172639	0
SRR1331730	Normal_Esophagus	0.549361	0
SRR1076535	Normal_Esophagus	0.639074	0
SRR1479175	Normal_Esophagus	0.464515	0
SRR1454247	Normal_Esophagus	0.641513	0
SRR1405569	Normal_Esophagus	0.129525	0
SRR1071011	Normal_Esophagus	0.550061	0
SRR1327769	Normal_Esophagus	0.133367	0
5f7ddd47-5b4f-493b-a647-8f78321ad76b	Normal_Esophagus	0.116017	0
9bf3db35-d868-4d76-8dd5-e0b5a3a28f2d	Normal_Esophagus	0.0781039	0
SRR1082520	Normal_Fallopian Tube	0.698726	0
SRR1071359	Normal_Fallopian Tube	0.821346	0
SRR1076584	Normal_Fallopian Tube	0.541136	0
SRR1074140	Normal_Fallopian Tube	0.55925	0
SRR1083776	Normal_Fallopian Tube	0.581699	0
SRR1101693	Normal_Fallopian Tube	0.917005	0
SRR811938	Normal_Fallopian Tube	0.437023	0
8f0e40ca-fffd-4c44-9190-2d8bbbe2795b	Normal_Head and Neck	0.250895	0.322197
2219f518-6d0f-445a-9364-d8a1981f7bfc	Normal_Head and Neck	2.63105	0.227879
6998dbbb-4db5-4e25-a970-2535fb4c2795	Normal_Head and Neck	1.45018	0.086203
51006178-1d95-4fff-ab12-55946a3e0eb6	Normal_Head and Neck	1.0258	0.06556
3feaa12e-0757-4f34-b68d-818e3adc6321	Normal_Head and Neck	0.965691	0.0602502
83da07b9-8480-4eec-96ab-90de03c784b6	Normal_Head and Neck	1.1555	0.0539983
f8bedde0-97eb-4ad8-b50c-0f29c43b8482	Normal_Head and Neck	1.57051	0.0204902
abc53910-8d01-40fd-8fd4-0dd753ddeba0	Normal_Head and Neck	0.352661	0
706020d5-dc4c-4f6b-ab37-2c8d6770a528	Normal_Head and Neck	1.6138	0
b297ec81-8329-488d-8368-2353ac3b5f73	Normal_Head and Neck	0.765763	0
6418f97a-2596-400b-b16c-45f0c05a178c	Normal_Head and Neck	0.779691	0
6aa0a3c3-7a88-4401-b00d-b444334a9f4c	Normal_Head and Neck	2.70767	0
SRR1430420	Normal_Heart	0	0.0762983
SRR1352936	Normal_Heart	0.141325	0.0176948
SRR1408072	Normal_Heart	2.34797	0.00108366
SRR662150	Normal_Heart	5.88083	0
SRR810051	Normal_Heart	0.562364	0
SRR1455326	Normal_Heart	3.63164	0
SRR661337	Normal_Heart	4.50281	0
SRR1400889	Normal_Heart	3.45055	0
SRR1318662	Normal_Heart	1.01298	0
SRR1084892	Normal_Heart	0.276377	0
SRR2164847	Normal_Heart	1.28116	0
SRR812649	Normal_Heart	0.203756	0
SRR1378131	Normal_Heart	2.70549	0
SRR1333414	Normal_Heart	1.10112	0
SRR1349433	Normal_Heart	0.480194	0
SRR661120	Normal_Heart	0.684227	0
SRR1088340	Normal_Heart	2.50025	0
SRR1321505	Normal_Heart	1.59986	0
SRR1442648	Normal_Heart	1.89733	0
SRR808772	Normal_Heart	3.17034	0
SRR1102756	Normal_Heart	0.560013	0
SRR807727	Normal_Heart	0.432455	0
SRR1458358	Normal_Heart	1.40703	0
SRR1310373	Normal_Heart	0.166472	0
SRR1465871	Normal_Kidney	1.40391	0.589657
SRR1416516	Normal_Kidney	0.243386	0.441837
170d6409-f0b3-4c29-b74e-2677f2802963	Normal_Kidney	2.20624	0.122727
SRR1377578	Normal_Kidney	0.423103	0.112117
3f684e89-a2c5-469f-8271-32312440cce3	Normal_Kidney	0.841646	0.0577219
34d8892b-a089-46db-89c1-0d6646a107b8	Normal_Kidney	0.969876	0.0539863
SRR810007	Normal_Kidney	0.444005	0.0404954
SRR1486080	Normal_Kidney	0.437016	0.0396252
SRR1071807	Normal_Kidney	0.542957	0.0337278
598a6d58-515e-468e-900f-81b7b46825e7	Normal_Kidney	1.45411	0.0200643
fc84d313-14f6-49ee-8dab-5cffeea4a923	Normal_Kidney	0.592919	0.0110101
bd087e8d-c7f1-4d9e-92f5-6826f18fcbfb	Normal_Kidney	2.27279	0.00941242
e3c14754-0156-4cb4-88ef-d1c27af56730	Normal_Kidney	0.799042	0.00330446
SRR1437274	Normal_Kidney	0	0.00211167
SRR1314940	Normal_Kidney	0.967154	0
6789650a-d287-406a-a0b2-1c7c103bc4ad	Normal_Kidney	0.595244	0
fa935206-889d-4b51-b538-2bf48de48726	Normal_Kidney	2.00192	0
c51333cf-d7a1-425e-936b-c95e456aff76	Normal_Kidney	1.81215	0
9aa5248e-6e60-440d-bc7e-47afc639e72b	Normal_Kidney	1.04689	0
ab85be8b-c8d2-4959-92fe-f454da968ff5	Normal_Kidney	1.31724	0
SRR1435730	Normal_Kidney	0.622591	0
b71fe2c1-139f-4dd7-b6af-3c9983ebe802	Normal_Kidney	1.34144	0
d246addc-2634-449a-8940-086cc752415f	Normal_Kidney	1.81293	0
SRR1089504	Normal_Kidney	0.514656	0
SRR1325483	Normal_Kidney	0.115063	0
6964d1cf-b7c3-4990-9eaf-b8db98c1b869	Normal_Kidney	1.50672	0
40887a1c-9035-4bdd-98f6-8ede8c000916	Normal_Kidney	2.07386	0
c7c12dca-70bc-46b9-be57-35407f83fd61	Normal_Kidney	0.921465	0
d0fd90b0-2df9-4cc5-8f26-f9248b9676e9	Normal_Kidney	0.918475	0
aa669f77-ef16-4290-a390-7892d2bad455	Normal_Kidney	0.696243	0
SRR1490658	Normal_Kidney	0.361164	0
a90bca93-d97e-4af6-8c0a-269b0cf8f9df	Normal_Kidney	0.934581	0
075ace13-49ad-4aef-85e5-69a7ddcdd3cf	Normal_Kidney	0.856343	0
af8d5dc2-d607-43fe-b05a-ace5f78d6d3f	Normal_Kidney	1.25929	0
742b8696-e382-47f9-8ec8-f9fd8a51e694	Normal_Kidney	0.73926	0
4f495956-4b59-4c6e-9e1b-0feb04f692cc	Normal_Kidney	0.836745	0
704e2cee-ed01-4c98-99c6-745ae4864781	Normal_Liver	0.181366	0.0641674
bd63c124-f645-4191-94d4-415ce2dc48aa	Normal_Liver	0.395867	0.0558381
a25514b8-d845-4a6e-a611-cafac5b48550	Normal_Liver	0.469468	0.0433188
95675a63-1eab-455e-9725-dc15563e3487	Normal_Liver	0.138664	0.0370385
fb3e8cf5-88fa-4cf9-9346-450e34ca74a3	Normal_Liver	0.590332	0.0340752
3916f71c-19da-44e1-b967-c81db579e130	Normal_Liver	0.350222	0.0334302
SRR1414515	Normal_Liver	0.159155	0.0290256
04eea324-164f-46a1-9869-5f78276c7ef5	Normal_Liver	0.778774	0.011769
SRR1376852	Normal_Liver	0.165027	0
SRR1444083	Normal_Liver	0.151418	0
SRR1389384	Normal_Liver	0.259085	0
SRR1071668	Normal_Liver	0.305204	0
108b6ade-fc49-4084-acb2-4f4d984a8cef	Normal_Liver	0.0418377	0
d3b84872-b301-4f29-be6e-d91cb61e6c52	Normal_Liver	0.0634874	0
SRR1317554	Normal_Liver	0.513632	0
SRR1490546	Normal_Liver	0.00572468	0
SRR1073435	Normal_Liver	0.0617186	0
SRR1349479	Normal_Liver	0.689337	0
SRR1375721	Normal_Liver	0	0
SRR1412969	Normal_Liver	0.218307	0
SRR1089446	Normal_Liver	0.29958	0
a5d2cab6-4893-4aea-abf0-e3a3c332fcce	Normal_Liver	0.12778	0
b7f59990-bb5e-43b3-bdc8-09f6c6f67f8e	Normal_Liver	0.359883	0
bb1c8ac1-e42d-49c0-a25b-3d2c7e3bb250	Normal_Liver	0.521351	0
SRR1098998	Normal_Lung	8.66365	0.345756
db070141-5d9d-448c-9f97-a0737762c9c2	Normal_Lung	11.9927	0.293734
766f3ef2-d1a3-46a8-9881-966e8e2b9b02	Normal_Lung	5.83923	0.274158
4f4a304b-0e65-467e-b07e-155c528ceb15	Normal_Lung	7.43202	0.108899
5cbe1295-051e-457c-afab-55b41a8d31b6	Normal_Lung	3.42394	0.101679
d6d77689-b81e-499e-a59c-780ca45d3c38	Normal_Lung	5.19775	0.100237
99b903cc-a88c-4563-8aeb-252d68736388	Normal_Lung	6.84526	0.0894707
a2aa88fc-1e08-478c-99ad-cc4da64efda9	Normal_Lung	8.73261	0.0883357
c7bd91b0-6e2c-4a35-95f0-c7249423026a	Normal_Lung	6.54878	0.0679845
e3d8e66a-e824-4cd9-8286-82ea6e89c61b	Normal_Lung	9.9637	0.0334076
e3c8680d-9811-46f6-ad67-fcbe90a7643c	Normal_Lung	3.37434	0.0281945
42ada204-c264-408d-a6f3-9ed3c8257a1f	Normal_Lung	3.55845	0.0225846
99e4c0b7-efb1-43b8-8f3a-62a7a75b87f1	Normal_Lung	6.32129	0.00864778
11de73cd-dc49-4247-9c3a-1c88d3748d2b	Normal_Lung	5.98683	0.00588681
1d6a9841-eb31-44de-a5a2-e03533ca4992	Normal_Lung	3.29752	0.00574889
SRR604390	Normal_Lung	1.14341	7.37e-10
SRR1439719	Normal_Lung	22.8519	0
17d3f67c-7d54-4866-88d5-96272a8b8bee	Normal_Lung	8.24221	0
SRR1443677	Normal_Lung	7.27863	0
SRR1417088	Normal_Lung	6.56436	0
9e023932-81a2-4bcd-90c5-c4c65ed573cd	Normal_Lung	26.8329	0
529ed74f-b681-4fc8-9a1d-b14506f4e1ab	Normal_Lung	12.2235	0
SRR663549	Normal_Lung	9.94051	0
SRR1309468	Normal_Lung	7.56682	0
SRR1434048	Normal_Lung	13.8328	0
SRR1471989	Normal_Lung	1.76708	0
fb58711e-3506-44e3-b668-e69a823a2f81	Normal_Lung	17.536	0
SRR600900	Normal_Lung	0.80137	0
SRR665658	Normal_Lung	3.02479	0
SRR1381161	Normal_Lung	3.26289	0
a4a5c7e9-c536-4e87-b337-eb5a003ba9fe	Normal_Lung	7.60186	0
821336cd-4fc5-4050-8e19-92549c352dce	Normal_Lung	2.99669	0
1b9642cd-d963-4251-a929-b499516a3f82	Normal_Lung	3.48921	0
d8a237bb-450e-44cd-8c1a-81ca6cd443f0	Normal_Lung	5.4166	0
0daa1a31-b86c-4353-b403-59db8ebcb851	Normal_Lung	9.38111	0
d0979620-999f-44c7-9e8b-44548f7927ef	Normal_Lung	2.99466	0
SRR1458683	Normal_Muscle	3.55116	0.0674425
SRR1402328	Normal_Muscle	0.354054	0.0540604
SRR1458220	Normal_Muscle	0.981927	0.0514335
SRR1388873	Normal_Muscle	0.0426939	0.024725
SRR1318839	Normal_Muscle	0.847124	0.00190185
SRR1377862	Normal_Muscle	0.242964	0
SRR1347937	Normal_Muscle	1.80055	0
SRR627439	Normal_Muscle	0.0763597	0
SRR1321987	Normal_Muscle	0.591612	0
SRR1402153	Normal_Muscle	0.115542	0
SRR1490037	Normal_Muscle	0.688888	0
SRR1480038	Normal_Muscle	0.305586	0
SRR612203	Normal_Nerve	0.475538	0.473186
SRR1432049	Normal_Nerve	0.297059	0.106314
SRR1419985	Normal_Nerve	0.266703	0.0252739
SRR1457015	Normal_Nerve	0.970234	0.0101346
SRR1500360	Normal_Nerve	1.16293	0
SRR1322227	Normal_Nerve	0.202171	0
SRR1097055	Normal_Nerve	0.182337	0
SRR1326427	Normal_Nerve	1.54783	0
SRR1480200	Normal_Nerve	0.858235	0
SRR612911	Normal_Nerve	0	0
SRR820938	Normal_Nerve	0.374829	0
SRR1380336	Normal_Nerve	0.426779	0
SRR1101859	Normal_Ovary	0.226575	0
SRR814293	Normal_Ovary	0.100756	0
SRR1355512	Normal_Ovary	0.262438	0
SRR1086212	Normal_Ovary	0.223733	0
SRR1347518	Normal_Ovary	0.577277	0
SRR1356078	Normal_Ovary	0.287805	0
SRR1430507	Normal_Ovary	0.28472	0
SRR1451820	Normal_Ovary	0.454718	0
SRR1469997	Normal_Ovary	0.673179	0
SRR1458870	Normal_Ovary	0.214397	0
SRR1454607	Normal_Ovary	0.738562	0
SRR809897	Normal_Ovary	0.114377	0
3e3ea95f-36e4-47a1-8e37-6a83ae711c06	Normal_Pancreas	1.60363	0.327197
SRR1330746	Normal_Pancreas	0.29536	0.0495114
d4f15225-b2f4-47f4-8147-a7a6f0b62e65	Normal_Pancreas	1.04917	0.0428581
SRR1088537	Normal_Pancreas	0.190555	0.0285596
SRR1374739	Normal_Pancreas	0.293718	0.0174478
SRR811607	Normal_Pancreas	0.427931	0.0109199
SRR1360766	Normal_Pancreas	0.377632	0
SRR1338513	Normal_Pancreas	0.157592	0
SRR657077	Normal_Pancreas	0	0
SRR1324519	Normal_Pancreas	0.186524	0
SRR1087728	Normal_Pancreas	0.325333	0
d5c17ebd-f997-464e-9ffc-c4f9f8fe0dc1	Normal_Pancreas	1.9689	0
SRR1481146	Normal_Pancreas	0.122104	0
SRR1435857	Normal_Pancreas	0.48429	0
SRR1394275	Normal_Pancreas	0.424791	0
606c0bba-703f-4b10-813b-38ef08da90e5	Normal_Pancreas	0.857076	0
SRR1077968	Normal_Pituitary	0.895296	0.113235
SRR1336029	Normal_Pituitary	1.19695	0.096815
SRR1430991	Normal_Pituitary	0.771018	0.096098
SRR1347389	Normal_Pituitary	1.0018	0.0802414
SRR1350792	Normal_Pituitary	1.31118	0.0427543
SRR1384713	Normal_Pituitary	0.894098	0.00377174
SRR816517	Normal_Pituitary	2.55314	0
SRR1343720	Normal_Pituitary	1.05881	0
SRR1445132	Normal_Pituitary	1.47203	0
SRR1340241	Normal_Pituitary	1.55154	0
SRR1485042	Normal_Pituitary	1.2284	0
SRR1435372	Normal_Pituitary	0.616162	0
SRR1400100	Normal_Prostate	1.36437	0.173676
SRR1486348	Normal_Prostate	0.415136	0.135983
e4b5a7e7-9f33-4daa-8b85-8b354e9d3e9a	Normal_Prostate	0.887523	0.118304
SRR1489631	Normal_Prostate	0.292515	0.0983626
SRR813108	Normal_Prostate	1.00064	0.0466928
SRR1098686	Normal_Prostate	0.562055	0.0407145
SRR1430928	Normal_Prostate	0.159925	0.0283463
93020b3a-9cef-40fb-8584-1203c9b86794	Normal_Prostate	0.691476	0.0278953
7701d6c4-fc1d-4724-9dab-6c6c96147bbc	Normal_Prostate	0.433468	0.0242571
8b3d4a3d-2bfa-48f8-b31f-901f49a5bf6b	Normal_Prostate	1.0753	0.00197427
SRR1434545	Normal_Prostate	23.4175	0
SRR1476507	Normal_Prostate	0.47867	0
SRR1317751	Normal_Prostate	0.148319	0
SRR1465375	Normal_Prostate	0.4404	0
SRR1078684	Normal_Prostate	0.152534	0
SRR1091990	Normal_Prostate	0.604452	0
3ce23096-520f-457e-81bc-d39edd4c530c	Normal_Prostate	1.51659	0
8a36555b-9e27-40ee-a8df-4b15d6580a02	Normal_Prostate	0.315338	0
8fe5d893-dba0-48a4-b824-3e57bbedfdc8	Normal_Prostate	0.090327	0
e06cc092-c476-46b6-b287-fc90b95f4db4	Normal_Prostate	0.500656	0
d22a8636-cffc-40b7-8809-8ffb425cbbce	Normal_Prostate	0.61739	0
f4c1b2b1-ba1f-4355-a1ac-3e952cf351a5	Normal_Prostate	0.76815	0
01428246-ae4b-47ea-a910-fe299883a42d	Normal_Prostate	0.64276	0
306d4fe1-1515-44e0-b527-eee0e83412bf	Normal_Prostate	0.554468	0
SRR1381185	Normal_Salivary Gland	0.0845346	0.0275697
SRR1486322	Normal_Salivary Gland	0.122397	0.0172517
SRR1469390	Normal_Salivary Gland	0.624543	0
SRR1406135	Normal_Salivary Gland	0.590476	0
SRR1444370	Normal_Salivary Gland	0.588252	0
SRR1405147	Normal_Salivary Gland	0.280298	0
SRR1469062	Normal_Salivary Gland	0.223279	0
SRR1386927	Normal_Salivary Gland	0.0186593	0
SRR1407044	Normal_Salivary Gland	0.264937	0
SRR1429540	Normal_Salivary Gland	0.194889	0
SRR1413307	Normal_Salivary Gland	0.71229	0
SRR1429429	Normal_Salivary Gland	0.160628	0
SRR1077826	Normal_Skin	0.727536	0.570325
SRR1093794	Normal_Skin	0.612367	0.351291
SRR1094003	Normal_Skin	0.222329	0.224086
SRR612659	Normal_Skin	0	0.169818
SRR1085334	Normal_Skin	1.28284	0.169242
SRR816839	Normal_Skin	0.47806	0.1483
SRR1091278	Normal_Skin	0.46277	0.133587
SRR1487846	Normal_Skin	0.111548	0.0295127
SRR1098761	Normal_Skin	1.69884	0.0261103
SRR1381973	Normal_Skin	0.302408	0.00941064
SRR612503	Normal_Skin	0	0
SRR1094216	Normal_Skin	0.997537	0
SRR1332117	Normal_Skin	0.214602	0
SRR1478921	Normal_Skin	0.279083	0
SRR1324165	Normal_Skin	0.0980405	0
SRR1321696	Normal_Skin	0.0731573	0
SRR1329400	Normal_Skin	0.298092	0
SRR1479866	Normal_Skin	0.107817	0
SRR1476426	Normal_Skin	0.378749	0
SRR1312082	Normal_Skin	1.8953	0
SRR1099212	Normal_Skin	0.834743	0
SRR1443507	Normal_Skin	0.696158	0
SRR1407624	Normal_Skin	0.773866	0
SRR819844	Normal_Skin	0.118726	0
SRR1366081	Normal_Skin	0.155287	0
SRR657575	Normal_Skin	0.56761	0
SRR1075247	Normal_Skin	0.391338	0
SRR1440268	Normal_Skin	0.176402	0
SRR1479216	Normal_Skin	0.548679	0
SRR1314137	Normal_Skin	0.0875982	0
SRR1401510	Normal_Skin	0.299531	0
SRR1335489	Normal_Skin	0.115602	0
SRR1434355	Normal_Skin	0.237568	0
SRR1400078	Normal_Skin	0.266132	0
SRR1075923	Normal_Skin	0.322891	0
SRR660522	Normal_Skin	0.340328	0
SRR1085378	Normal_Small Intestine	1.18485	0.146721
SRR1445170	Normal_Small Intestine	0.377607	0.0354334
SRR1413119	Normal_Small Intestine	0.707864	0.0152865
SRR1087680	Normal_Small Intestine	1.331	0
SRR1473611	Normal_Small Intestine	0.458762	0
SRR1359587	Normal_Small Intestine	0.723815	0
SRR1460095	Normal_Small Intestine	0.850418	0
SRR1454225	Normal_Small Intestine	0.599025	0
SRR1340782	Normal_Small Intestine	0.352961	0
SRR1313664	Normal_Small Intestine	0.372191	0
SRR1409772	Normal_Small Intestine	0.30014	0
SRR1436262	Normal_Small Intestine	0.429515	0
SRR1499503	Normal_Spleen	0.375598	0.153189
SRR1094073	Normal_Spleen	1.68723	0.108016
SRR1074526	Normal_Spleen	0.497549	0.0976644
SRR1415956	Normal_Spleen	2.20424	0.0354229
SRR1069400	Normal_Spleen	1.37754	0.00612344
SRR1324062	Normal_Spleen	3.0636	0
SRR1389522	Normal_Spleen	0.92868	0
SRR1318732	Normal_Spleen	1.79812	0
SRR1378045	Normal_Spleen	1.68469	0
SRR1401972	Normal_Spleen	3.55924	0
SRR1085087	Normal_Spleen	2.8014	0
SRR1092257	Normal_Spleen	3.09082	0
4105cc38-24a5-421c-b9f3-1562c4e8e82f	Normal_Stomach	0.888728	0.341185
bb1c5011-448f-4ff7-b329-a51064b866d7	Normal_Stomach	1.77931	0.204543
524ebba1-4074-4e58-9163-7f9fda69b6c3	Normal_Stomach	0.453524	0.203058
9bf70fda-4b07-41b4-86f5-0293cbb80f78	Normal_Stomach	0.739144	0.142198
b0ecb001-e045-4f1a-92ea-f27eb4aa6a09	Normal_Stomach	0.84397	0.134529
9f3cba19-0559-447e-a5c9-1904b7d8fc02	Normal_Stomach	0.868483	0.117527
089a6966-9e76-4442-98a3-0c2cea364978	Normal_Stomach	0.915908	0.109857
c8375df3-03d2-43da-a262-718a810031c9	Normal_Stomach	0.54537	0.0834713
350d22ba-4371-40b9-bc83-cacfb9109b49	Normal_Stomach	0.427225	0.0796258
8e940ae4-a294-4f74-914b-2f05949298b5	Normal_Stomach	0.185679	0.0684018
8672ce81-5df8-4464-bbf4-ac124d58ced5	Normal_Stomach	1.48233	0.0682188
SRR1071761	Normal_Stomach	0.0155495	0
SRR1478855	Normal_Stomach	0.273525	0
SRR1347082	Normal_Stomach	0.10065	0
SRR1343175	Normal_Stomach	0.22037	0
SRR814195	Normal_Stomach	0.00624337	0
SRR1417749	Normal_Stomach	0.229202	0
SRR1089737	Normal_Stomach	0.301396	0
SRR1476760	Normal_Stomach	0.296741	0
SRR1083262	Normal_Stomach	0.238739	0
SRR1331858	Normal_Stomach	0.235276	0
SRR1430860	Normal_Stomach	0.0795885	0
7e24f6fc-e341-43a7-b1b3-7688c6b30f15	Normal_Stomach	0.481203	0
SRR1364641	Normal_Stomach	0.19528	0
SRR1120847	Normal_Testis	0.380836	0
SRR1081614	Normal_Testis	0.531733	0
SRR1389018	Normal_Testis	0.92965	0
SRR1358260	Normal_Testis	0.530717	0
SRR1328125	Normal_Testis	0.466705	0
SRR1345347	Normal_Testis	0.380748	0
SRR1352597	Normal_Testis	0.860773	0
SRR1335338	Normal_Testis	0.426096	0
SRR807517	Normal_Testis	0.399937	0
SRR1081449	Normal_Testis	0.243437	0
SRR1380699	Normal_Testis	0.424169	0
SRR1486439	Normal_Testis	0.448251	0
dbb2a989-3b5c-4c42-8097-ce20470f6846	Normal_Thymus	6.5942	0.117222
0a3215fd-7ee8-4379-be19-e18332f94beb	Normal_Thymus	3.22438	0
SRR1434760	Normal_Thyroid	1.0572	0.120136
3180d879-a1c2-40fd-b42d-95c617202cd6	Normal_Thyroid	4.89664	0.114206
a35e65c0-7a64-46d4-abcb-a5c640bf12b9	Normal_Thyroid	0.958793	0.0993736
SRR1376497	Normal_Thyroid	0.995968	0.073597
b5e42ffc-c342-466e-a542-7a2177e4338d	Normal_Thyroid	1.43822	0.0607854
SRR1409875	Normal_Thyroid	1.20258	0.0545252
SRR601962	Normal_Thyroid	0.805402	0.0503083
SRR1435113	Normal_Thyroid	0.690459	0.047889
e2847248-97d3-4cfc-8cb1-2cee0a0181e8	Normal_Thyroid	3.88998	0.0324889
58daefa9-b7bb-4285-bc16-cc56fbafaddd	Normal_Thyroid	1.34247	0.0284436
8df7ff21-c6d1-48a4-98a9-47197d7f17fb	Normal_Thyroid	1.21752	0.00578962
SRR661409	Normal_Thyroid	0.759113	0
SRR603834	Normal_Thyroid	0.37722	0
SRR1343433	Normal_Thyroid	0.776842	0
4bc43cce-75ca-40eb-990f-a00ce0add413	Normal_Thyroid	2.24795	0
SRR1327366	Normal_Thyroid	1.1387	0
SRR1095937	Normal_Thyroid	1.42435	0
2a8dd221-b95a-4d6b-baaa-573f9b6ce1cc	Normal_Thyroid	2.42938	0
cabc2632-e822-444a-a229-d64a9cd5760a	Normal_Thyroid	2.67992	0
SRR1419211	Normal_Thyroid	0.344223	0
SRR1441483	Normal_Thyroid	0.4515	0
08115b44-0266-4b4f-8772-1579f0dc7a9d	Normal_Thyroid	3.29972	0
f36730b4-d8aa-4b2d-9dc5-73c663a6f686	Normal_Thyroid	1.88849	0
b9a2466b-34b9-48ac-95ad-15927cb026df	Normal_Thyroid	1.42977	0
SRR1071737	Normal_Uterus	0	0.15503
SRR815256	Normal_Uterus	0.185078	0.0829922
SRR1339258	Normal_Uterus	0.837801	0.0284626
ff6f4200-7c6e-4781-8e27-042816453d95	Normal_Uterus	0.528292	0.0277346
2c062d4f-48a8-4599-abc4-4bc8a73ad939	Normal_Uterus	0.487365	0.017914
SRR1388257	Normal_Uterus	1.4327	0
8c439104-4268-4ce1-adf2-1fdd825d35d3	Normal_Uterus	0.839045	0
1369838c-39b4-4afa-a2b4-ed54713918c4	Normal_Uterus	0.696254	0
b97c08e9-0b6b-4993-8cbd-c5dfd69a85dc	Normal_Uterus	0.725654	0
SRR1363718	Normal_Uterus	0.109159	0
SRR1498726	Normal_Uterus	1.2601	0
SRR818139	Normal_Uterus	1.60298	0
SRR1360280	Normal_Uterus	0.34656	0
SRR1336682	Normal_Uterus	0.85835	0
SRR1475086	Normal_Uterus	0.17225	0
88d62d29-a483-4500-8d94-d71b799feba1	Normal_Uterus	2.19231	0
SRR817817	Normal_Uterus	0.679194	0
d11ab86d-cbe1-4d6c-8920-bb6c71df44da	Normal_Uterus	1.34253	0
5e23152e-c24b-408c-baaa-cd1969be10e5	Normal_Uterus	1.59161	0
SRR1387132	Normal_Uterus	0.196079	0
d2ebbba7-3092-4168-a1f1-55c61f73daeb	Normal_Uterus	1.09383	0
d98b9d1d-fe97-44ae-b268-a18156ef50b9	Normal_Uterus	0.367213	0
7e503dd3-a77d-461f-8783-e0afef2e6566	Normal_Uterus	0.459086	0
09175ec3-1677-4728-8e3c-9f01b1aafda9	Normal_Uterus	0.533565	0
6bc83e0e-bb0e-4f05-a065-3c575f031ab8	Normal_Uterus	1.29875	0
SRR1417296	Normal_Vagina	8.8667e-05	0.149564
SRR1445920	Normal_Vagina	0.0306353	0.087735
SRR1318390	Normal_Vagina	0.0859418	0.0668558
SRR1095599	Normal_Vagina	0.229562	0.0476129
SRR1089106	Normal_Vagina	1.23771	0.0183791
SRR1487638	Normal_Vagina	0.433317	0.0121961
SRR1447172	Normal_Vagina	0.244983	0.0108896
SRR811403	Normal_Vagina	0.299998	0
SRR1334791	Normal_Vagina	0.947832	0
SRR811675	Normal_Vagina	0.496513	0
SRR1397030	Normal_Vagina	0.416548	0
SRR1344185	Normal_Vagina	0.322271	0
