# Supplementary material for: Soluble PD-L1 generated by endogenous retroelement exaptation is a receptor antagonist
Source: eLife. 2019 Nov 15;8:e50256. doi: 10.7554/eLife.50256 (PMC6877088; doi:10.7554/eLife.50256)
Supplement: Figure 3—source data 1. [file elife-50256-fig3-data1.xlsx]

## Sheet: CD247 v1 and v4 TPMs
Expression of CD274 variants in the CCLE collection
CCLE name	Cell line primary name	Gender	Site Primary	Histology	HistSubtype1	CD274 variant 1 TPMs	CD274-L2A TPMs
RKO_LARGE_INTESTINE	RKO	unknown	large_intestine	carcinoma	adenocarcinoma	56.8843	13.7892
CAL120_BREAST	CAL-120	F	breast	carcinoma	NS	40.5042	12.3659
CAL62_THYROID	CAL-62	F	thyroid	carcinoma	anaplastic_carcinoma	34.662	10.1724
BDCM_HAEMATOPOIETIC_AND_LYMPHOID_TISSUE	BDCM	M	haematopoietic_and_lymphoid_tissue	lymphoid_neoplasm	acute_lymphoblastic_B_cell_leukaemia	16.6727	6.8662
NCIH1395_LUNG	NCI-H1395	F	lung	carcinoma	adenocarcinoma	4.36888	6.36512
BFTC909_KIDNEY	BFTC-909	M	kidney	carcinoma	NS	145.909	6.05941
FTC238_THYROID	FTC-238	M	thyroid	carcinoma	follicular_carcinoma	28.4048	5.07374
CORL23_LUNG	COR-L23	M	lung	carcinoma	large_cell_carcinoma	21.1878	4.32449
HS746T_STOMACH	Hs 746T	M	stomach	carcinoma	NS	45.3685	4.21847
LOXIMVI_SKIN	LOX IMVI	unknown	skin	malignant_melanoma	NS	16.5626	3.84614
PANC1005_PANCREAS	Panc 10.05	M	pancreas	carcinoma	ductal_carcinoma	12.8631	3.70854
NUGC3_STOMACH	NUGC-3	M	stomach	carcinoma	NS	25.1377	3.0288
647V_URINARY_TRACT	647-V	M	urinary_tract	carcinoma	transitional_cell_carcinoma	53.8556	2.7283
5637_URINARY_TRACT	5637	M	urinary_tract	carcinoma	NS	38.169	2.71354
EPLC272H_LUNG	EPLC-272H	M	lung	carcinoma	squamous_cell_carcinoma	9.57909	2.60058
HUCCT1_BILIARY_TRACT	HuCCT1	M	biliary_tract	carcinoma	NS	8.7669	2.58298
CAL12T_LUNG	CAL-12T	M	lung	carcinoma	non_small_cell_carcinoma	15.7365	2.42841
NCIH650_LUNG	NCI-H650	M	lung	carcinoma	bronchioloalveolar_adenocarcinoma	6.13311	2.37274
SCABER_URINARY_TRACT	SCaBER	M	urinary_tract	carcinoma	transitional_cell_carcinoma	3.4346	2.34325
JVM2_HAEMATOPOIETIC_AND_LYMPHOID_TISSUE	JVM-2	F	haematopoietic_and_lymphoid_tissue	lymphoid_neoplasm	chronic_lymphocytic_leukaemia-small_lymphocytic_lymphoma	63.598	2.30914
YD38_UPPER_AERODIGESTIVE_TRACT	YD-38	M	upper_aerodigestive_tract	carcinoma	squamous_cell_carcinoma	12.0366	2.28285
DU145_PROSTATE	DU 145	M	prostate	carcinoma	NS	5.61739	1.99017
PANC0327_PANCREAS	Panc 03.27	F	pancreas	carcinoma	ductal_carcinoma	17.0995	1.85915
HT1197_URINARY_TRACT	HT-1197	M	urinary_tract	carcinoma	NS	15.3162	1.85876
AM38_CENTRAL_NERVOUS_SYSTEM	AM-38	M	central_nervous_system	glioma	astrocytoma_Grade_IV	28.3505	1.84122
T3M10_LUNG	T3M-10	M	lung	carcinoma	large_cell_carcinoma	5.79073	1.65226
NCIH2347_LUNG	NCI-H2347	F	lung	carcinoma	adenocarcinoma	21.3798	1.58982
JVM3_HAEMATOPOIETIC_AND_LYMPHOID_TISSUE	JVM-3	M	haematopoietic_and_lymphoid_tissue	lymphoid_neoplasm	chronic_lymphocytic_leukaemia-small_lymphocytic_lymphoma	25.6285	1.55377
PECAPJ49_UPPER_AERODIGESTIVE_TRACT	PE/CA-PJ49	M	upper_aerodigestive_tract	carcinoma	squamous_cell_carcinoma	8.49775	1.47657
FADU_UPPER_AERODIGESTIVE_TRACT	FaDu	M	upper_aerodigestive_tract	carcinoma	squamous_cell_carcinoma	3.30579	1.45943
JIMT1_BREAST	JIMT-1	F	breast	carcinoma	ductal_carcinoma	21.7052	1.42836
RERFLCKJ_LUNG	RERF-LC-KJ	M	lung	carcinoma	non_small_cell_carcinoma	20.854	1.41802
PANC0813_PANCREAS	Panc 08.13	M	pancreas	carcinoma	ductal_carcinoma	38.9028	1.39703
A375_SKIN	A-375	F	skin	malignant_melanoma	NS	0.730465	1.36837
SH4_SKIN	SH-4	F	skin	malignant_melanoma	NS	0.840838	1.29061
IGR1_SKIN	IGR-1	M	skin	malignant_melanoma	NS	2.19572	1.28397
LN229_CENTRAL_NERVOUS_SYSTEM	LN-229	F	central_nervous_system	glioma	astrocytoma_Grade_IV	1.41282	1.26902
J82_URINARY_TRACT	J82	M	urinary_tract	carcinoma	transitional_cell_carcinoma	4.66895	1.26045
HCC2935_LUNG	HCC2935	M	lung	carcinoma	non_small_cell_carcinoma	12.4317	1.24699
NCIH1869_LUNG	NCI-H1869	M	lung	carcinoma	squamous_cell_carcinoma	8.73358	1.24513
42MGBA_CENTRAL_NERVOUS_SYSTEM	42-MG-BA	M	central_nervous_system	glioma	astrocytoma_Grade_IV	0.788403	1.2432
COV644_OVARY	COV644	F	ovary	carcinoma	NS	7.79589	1.22396
HUPT3_PANCREAS	HUP-T3	M	pancreas	carcinoma	NS	10.2101	1.22339
8505C_THYROID	8505C	F	thyroid	carcinoma	anaplastic_carcinoma	75.0811	1.19932
EHEB_HAEMATOPOIETIC_AND_LYMPHOID_TISSUE	EHEB	F	haematopoietic_and_lymphoid_tissue	lymphoid_neoplasm	chronic_lymphocytic_leukaemia-small_lymphocytic_lymphoma	23.9984	1.19314
NCIH1915_LUNG	NCI-H1915	F	lung	carcinoma	large_cell_carcinoma	18.3417	1.18529
ES2_OVARY	ES-2	F	ovary	carcinoma	clear_cell_carcinoma	18.5276	1.15561
MDAMB361_BREAST	MDA-MB-361	F	breast	carcinoma	NS	3.96209	1.14941
HS766T_PANCREAS	Hs 766T	M	pancreas	carcinoma	ductal_carcinoma	2.80532	1.12071
SNU668_STOMACH	SNU-668	M	stomach	carcinoma	signet_ring_adenocarcinoma	1.11733	1.11748
NCIH647_LUNG	NCI-H647	M	lung	carcinoma	mixed_adenosquamous_carcinoma	19.1143	1.00794
KG1C_CENTRAL_NERVOUS_SYSTEM	KG-1-C	M	central_nervous_system	glioma	astrocytoma_Grade_IV	3.87798	0.981008
BHY_UPPER_AERODIGESTIVE_TRACT	BHY	M	upper_aerodigestive_tract	carcinoma	squamous_cell_carcinoma	9.91618	0.970498
HS675T_LARGE_INTESTINE	Hs 675.T	M	large_intestine	carcinoma	NS	39.5172	0.957975
NCIH226_LUNG	NCI-H226	M	lung	carcinoma	squamous_cell_carcinoma	13.1873	0.955741
EJM_HAEMATOPOIETIC_AND_LYMPHOID_TISSUE	EJM	F	haematopoietic_and_lymphoid_tissue	lymphoid_neoplasm	plasma_cell_myeloma	1.48163	0.931593
HS936T_SKIN	Hs 936.T	M	skin	malignant_melanoma	NS	2.60697	0.915133
CAL27_UPPER_AERODIGESTIVE_TRACT	CAL 27	M	upper_aerodigestive_tract	carcinoma	squamous_cell_carcinoma	4.56894	0.910561
LCLC103H_LUNG	LCLC-103H	M	lung	carcinoma	large_cell_carcinoma	45.284	0.902027
						14.7986	0.893443
DM3_PLEURA	DM-3	M	pleura	mesothelioma	NS	6.94358	0.886714
NCIH2196_LUNG	NCI-H2196	M	lung	carcinoma	small_cell_carcinoma	7.09214	0.880672
NCIH1650_LUNG	NCI-H1650	M	lung	carcinoma	bronchioloalveolar_adenocarcinoma	1.72659	0.853337
ISTMES1_PLEURA	IST-MES1	F	pleura	mesothelioma	NS	1.9173	0.837929
SNU324_PANCREAS	SNU-324	M	pancreas	carcinoma	NS	54.3947	0.818761
SW900_LUNG	SW 900	M	lung	carcinoma	squamous_cell_carcinoma	19.5543	0.805011
SW1417_LARGE_INTESTINE	SW1417	F	large_intestine	carcinoma	adenocarcinoma	1.32922	0.798203
HUNS1_HAEMATOPOIETIC_AND_LYMPHOID_TISSUE	HuNS1	M	haematopoietic_and_lymphoid_tissue	lymphoid_neoplasm	plasma_cell_myeloma	11.8356	0.792455
BT20_BREAST	BT-20	F	breast	carcinoma	ductal_carcinoma	3.16266	0.790471
MDAMB231_BREAST	MDA-MB-231	F	breast	carcinoma	NS	16.4717	0.784445
TE1_OESOPHAGUS	TE-1	M	oesophagus	carcinoma	squamous_cell_carcinoma	7.07644	0.779795
SKMEL1_SKIN	SK-MEL-1	M	skin	malignant_melanoma	NS	1.99909	0.776061
HCC70_BREAST	HCC70	F	breast	carcinoma	ductal_carcinoma	6.98968	0.774622
HT1376_URINARY_TRACT	HT-1376	F	urinary_tract	carcinoma	transitional_cell_carcinoma	16.0418	0.77177
786O_KIDNEY	786-O	M	kidney	carcinoma	clear_cell_renal_cell_carcinoma	8.11549	0.769683
LS123_LARGE_INTESTINE	LS123	F	large_intestine	carcinoma	adenocarcinoma	6.57152	0.767024
UMUC3_URINARY_TRACT	UM-UC-3	M	urinary_tract	carcinoma	transitional_cell_carcinoma	2.13962	0.755972
DMS53_LUNG	DMS 53	M	lung	carcinoma	small_cell_carcinoma	2.02222	0.744873
NCIH596_LUNG	NCI-H596	M	lung	carcinoma	mixed_adenosquamous_carcinoma	3.28907	0.736712
FTC133_THYROID	FTC-133	M	thyroid	carcinoma	follicular_carcinoma	2.91423	0.718946
SKMEL28_SKIN	SK-MEL-28	M	skin	malignant_melanoma	NS	1.74945	0.718827
HDMYZ_HAEMATOPOIETIC_AND_LYMPHOID_TISSUE	HD-MY-Z	unknown	haematopoietic_and_lymphoid_tissue	lymphoid_neoplasm	Hodgkin_lymphoma	10.5834	0.718778
L1236_HAEMATOPOIETIC_AND_LYMPHOID_TISSUE	L-1236	M	haematopoietic_and_lymphoid_tissue	lymphoid_neoplasm	Hodgkin_lymphoma	35.5356	0.714636
CAL851_BREAST	CAL-85-1	F	breast	carcinoma	NS	33.5776	0.712446
KNS60_CENTRAL_NERVOUS_SYSTEM	KNS-60	M	central_nervous_system	glioma	astrocytoma_Grade_IV	32.9461	0.710215
HCC1954_BREAST	HCC1954	F	breast	carcinoma	ductal_carcinoma	6.25023	0.703415
SW48_LARGE_INTESTINE	SW48	F	large_intestine	carcinoma	adenocarcinoma	1.00938	0.683424
RPMI8226_HAEMATOPOIETIC_AND_LYMPHOID_TISSUE	RPMI 8226	M	haematopoietic_and_lymphoid_tissue	lymphoid_neoplasm	plasma_cell_myeloma	1.24164	0.679954
HPAFII_PANCREAS	HPAF-II	M	pancreas	carcinoma	ductal_carcinoma	1.53894	0.670858
NMCG1_CENTRAL_NERVOUS_SYSTEM	NMC-G1	unknown	central_nervous_system	glioma	NS	25.5315	0.658257
CAL29_URINARY_TRACT	CAL-29	F	urinary_tract	carcinoma	transitional_cell_carcinoma	2.14115	0.654171
HCC78_LUNG	HCC-78	M	lung	carcinoma	adenocarcinoma	22.9906	0.651567
HCC1833_LUNG	HCC-1833	unknown	lung	carcinoma	adenocarcinoma	0.267787	0.63643
HT1080_SOFT_TISSUE	HT-1080	M	soft_tissue	fibrosarcoma	NS	22.6045	0.636066
KS1_CENTRAL_NERVOUS_SYSTEM	KS-1	F	central_nervous_system	glioma	astrocytoma_Grade_IV	13.861	0.634435
DND41_HAEMATOPOIETIC_AND_LYMPHOID_TISSUE	DND-41	M	haematopoietic_and_lymphoid_tissue	lymphoid_neoplasm	acute_lymphoblastic_T_cell_leukaemia	1.31354	0.63107
NCIH838_LUNG	NCI-H838	M	lung	carcinoma	non_small_cell_carcinoma	0.546797	0.626944
KARPAS299_HAEMATOPOIETIC_AND_LYMPHOID_TISSUE	KARPAS-299	M	haematopoietic_and_lymphoid_tissue	lymphoid_neoplasm	anaplastic_large_cell_lymphoma	87.748	0.615426
HS172T_URINARY_TRACT	Hs 172.T	M	urinary_tract	carcinoma	NS	38.7698	0.612172
CORL105_LUNG	COR-L105	M	lung	carcinoma	adenocarcinoma	3.73989	0.595883
253JBV_URINARY_TRACT	253J-BV	unknown	urinary_tract	carcinoma	transitional_cell_carcinoma	0.724911	0.594096
SNU1079_BILIARY_TRACT	SNU-1079	unknown	biliary_tract	carcinoma	NS	3.61732	0.59004
DAOY_CENTRAL_NERVOUS_SYSTEM	Daoy	M	central_nervous_system	primitive_neuroectodermal_tumour-medulloblastoma	NS	3.99447	0.589106
SNU182_LIVER	SNU-182	M	liver	carcinoma	hepatocellular_carcinoma	1.95836	0.585413
HS618T_LUNG	Hs 618.T	F	lung	carcinoma	adenocarcinoma	6.43861	0.584104
U87MG_CENTRAL_NERVOUS_SYSTEM	U-87 MG	F	central_nervous_system	glioma	astrocytoma	4.45821	0.572283
S117_SOFT_TISSUE	S-117	F	soft_tissue	sarcoma	NS	39.5209	0.565869
OCIM1_HAEMATOPOIETIC_AND_LYMPHOID_TISSUE	OCI-M1	unknown	haematopoietic_and_lymphoid_tissue	haematopoietic_neoplasm	acute_myeloid_leukaemia	11.6629	0.559273
NCIH1793_LUNG	NCI-H1793	F	lung	carcinoma	non_small_cell_carcinoma	0.863626	0.555449
HT_HAEMATOPOIETIC_AND_LYMPHOID_TISSUE	HT	M	haematopoietic_and_lymphoid_tissue	lymphoid_neoplasm	B_cell_lymphoma_unspecified	0.0710366	0.54471
MKN7_STOMACH	MKN7	M	stomach	carcinoma	tubular_adenocarcinoma	19.7017	0.542823
OVSAHO_OVARY	OVSAHO	F	ovary	carcinoma	adenocarcinoma	0.155592	0.522674
NCIH684_LIVER	NCI-H684	unknown	liver	other	hepatoblastoma	0.151763	0.522118
SNUC5_LARGE_INTESTINE	SNU-C5	F	large_intestine	carcinoma	adenocarcinoma	6.80843	0.521388
NCIH322_LUNG	NCI-H322	M	lung	carcinoma	adenocarcinoma	8.28233	0.511121
MDST8_LARGE_INTESTINE	MDST8	unknown	large_intestine	carcinoma	adenocarcinoma	4.65689	0.510109
CAOV3_OVARY	Caov-3	F	ovary	carcinoma	adenocarcinoma	6.13011	0.506752
SNU1105_CENTRAL_NERVOUS_SYSTEM	SNU-1105	M	central_nervous_system	glioma	astrocytoma_Grade_IV	28.0304	0.500113
PANC0403_PANCREAS	Panc 04.03	M	pancreas	carcinoma	NS	4.51614	0.493317
SNU1272_KIDNEY	SNU-1272	F	kidney	carcinoma	clear_cell_renal_cell_carcinoma	9.1598	0.49012
OSRC2_KIDNEY	OS-RC-2	unknown	kidney	carcinoma	renal_cell_carcinoma	5.88713	0.478504
SKMEL5_SKIN	SK-MEL-5	F	skin	malignant_melanoma	NS	0.104697	0.472042
KMRC1_KIDNEY	KMRC-1	M	kidney	carcinoma	clear_cell_renal_cell_carcinoma	8.96691	0.467166
KARPAS422_HAEMATOPOIETIC_AND_LYMPHOID_TISSUE	KARPAS-422	unknown	haematopoietic_and_lymphoid_tissue	lymphoid_neoplasm	diffuse_large_B_cell_lymphoma	0.656648	0.466846
DV90_LUNG	DV-90	M	lung	carcinoma	adenocarcinoma	0.396504	0.464301
HS229T_LUNG	Hs 229.T	M	lung	carcinoma	adenocarcinoma	10.3375	0.458018
SCC4_UPPER_AERODIGESTIVE_TRACT	SCC-4	M	upper_aerodigestive_tract	carcinoma	squamous_cell_carcinoma	4.3029	0.457825
HS742T_BREAST	Hs 742.T	F	breast	carcinoma	NS	13.085	0.457619
PK1_PANCREAS	PK-1	unknown	pancreas	carcinoma	NS	4.81077	0.456706
SUDHL1_HAEMATOPOIETIC_AND_LYMPHOID_TISSUE	SU-DHL-1	M	haematopoietic_and_lymphoid_tissue	lymphoid_neoplasm	anaplastic_large_cell_lymphoma	33.1339	0.456701
BT549_BREAST	BT-549	F	breast	carcinoma	ductal_carcinoma	2.15331	0.448459
SW1573_LUNG	SW 1573	F	lung	carcinoma	squamous_cell_carcinoma	0.786961	0.446639
NCIH1299_LUNG	NCI-H1299	M	lung	carcinoma	non_small_cell_carcinoma	0.719196	0.438385
HS683_CENTRAL_NERVOUS_SYSTEM	Hs 683	M	central_nervous_system	glioma	NS	4.25687	0.432882
SKBR3_BREAST	SK-BR-3	F	breast	carcinoma	NS	0.82352	0.429493
KATOIII_STOMACH	KATO III	M	stomach	carcinoma	adenocarcinoma	0.285827	0.427188
SW480_LARGE_INTESTINE	SW480	M	large_intestine	carcinoma	adenocarcinoma	0.687618	0.425688
MEC1_HAEMATOPOIETIC_AND_LYMPHOID_TISSUE	MEC-1	M	haematopoietic_and_lymphoid_tissue	lymphoid_neoplasm	chronic_lymphocytic_leukaemia-small_lymphocytic_lymphoma	5.51447	0.423433
SNU1033_LARGE_INTESTINE	SNU-1033	F	large_intestine	carcinoma	NS	1.52403	0.420111
SW1710_URINARY_TRACT	SW-1710	F	urinary_tract	carcinoma	transitional_cell_carcinoma	0.958268	0.419491
HEYA8_OVARY	Hey-A8	F	ovary	carcinoma	NS	7.4517	0.418702
U266B1_HAEMATOPOIETIC_AND_LYMPHOID_TISSUE	U266B1	M	haematopoietic_and_lymphoid_tissue	lymphoid_neoplasm	plasma_cell_myeloma	0.232566	0.417743
PC14_LUNG	PC-14	unknown	lung	carcinoma	non_small_cell_carcinoma	1.82634	0.417092
AU565_BREAST	AU565	F	breast	carcinoma	NS	1.24636	0.41339
HCC1937_BREAST	HCC1937	F	breast	carcinoma	ductal_carcinoma	1.92968	0.412433
G361_SKIN	G-361	M	skin	malignant_melanoma	NS	0.692554	0.411409
HS706T_BONE	Hs 706.T	F	bone	giant_cell_tumour	NS	3.91876	0.410998
NCIH2073_LUNG	NCI-H2073	F	lung	carcinoma	adenocarcinoma	0.537588	0.410991
HEC6_ENDOMETRIUM	HEC-6	F	endometrium	carcinoma	adenocarcinoma	1.99511	0.407217
TT_THYROID	TT	F	thyroid	carcinoma	medullary_carcinoma	1.22183	0.406244
HS294T_SKIN	Hs 294T	M	skin	malignant_melanoma	NS	0.227303	0.405227
MM1S_HAEMATOPOIETIC_AND_LYMPHOID_TISSUE	MM1-S	unknown	haematopoietic_and_lymphoid_tissue	lymphoid_neoplasm	plasma_cell_myeloma	0.468384	0.400206
A172_CENTRAL_NERVOUS_SYSTEM	A172	M	central_nervous_system	glioma	astrocytoma_Grade_IV	2.30582	0.399237
HCC95_LUNG	HCC-95	M	lung	carcinoma	squamous_cell_carcinoma	1.21829	0.396556
SNU840_OVARY	SNU-840	F	ovary	carcinoma	Brenner_tumour	9.65454	0.387192
HSC4_UPPER_AERODIGESTIVE_TRACT	HSC-4	M	upper_aerodigestive_tract	carcinoma	squamous_cell_carcinoma	4.10177	0.386025
UACC893_BREAST	UACC-893	F	breast	carcinoma	ductal_carcinoma	0.264952	0.385353
BC3C_URINARY_TRACT	BC-3C	F	urinary_tract	carcinoma	transitional_cell_carcinoma	1.61115	0.376094
SKMEL30_SKIN	SK-MEL-30	M	skin	malignant_melanoma	NS	0.93763	0.366642
LU65_LUNG	LU65	M	lung	carcinoma	non_small_cell_carcinoma	1.3958	0.361641
HCC366_LUNG	HCC-366	F	lung	carcinoma	mixed_adenosquamous_carcinoma	1.5007	0.359498
SUIT2_PANCREAS	SUIT-2	M	pancreas	carcinoma	ductal_carcinoma	0.07083	0.357999
HCT15_LARGE_INTESTINE	HCT-15	M	large_intestine	carcinoma	adenocarcinoma	0.693996	0.353088
LOUNH91_LUNG	LOU-NH91	F	lung	carcinoma	squamous_cell_carcinoma	3.96658	0.352693
SUPM2_HAEMATOPOIETIC_AND_LYMPHOID_TISSUE	SUP-M2	F	haematopoietic_and_lymphoid_tissue	lymphoid_neoplasm	anaplastic_large_cell_lymphoma	18.818	0.350729
NCIH2170_LUNG	NCI-H2170	M	lung	carcinoma	squamous_cell_carcinoma	0.0821688	0.349878
A2058_SKIN	A2058	M	skin	malignant_melanoma	NS	1.87462	0.349793
OE33_OESOPHAGUS	OE33	F	oesophagus	other	metaplasia	17.3439	0.348984
A253_SALIVARY_GLAND	A-253	M	salivary_gland	carcinoma	mucoepidermoid_carcinoma	0.205481	0.345755
OVCAR8_OVARY	OVCAR-8	F	ovary	carcinoma	NS	0.681451	0.340608
KYSE270_OESOPHAGUS	KYSE-270	M	oesophagus	carcinoma	squamous_cell_carcinoma	0.363396	0.337636
NCIH460_LUNG	NCI-H460	M	lung	carcinoma	large_cell_carcinoma	2.75507	0.335868
LOUCY_HAEMATOPOIETIC_AND_LYMPHOID_TISSUE	Loucy	F	haematopoietic_and_lymphoid_tissue	lymphoid_neoplasm	acute_lymphoblastic_T_cell_leukaemia	0.362644	0.335242
NCIH2126_LUNG	NCI-H2126	M	lung	carcinoma	adenocarcinoma	0.999407	0.334295
GCT_SOFT_TISSUE	GCT	M	soft_tissue	malignant_fibrous_histiocytoma-pleomorphic_sarcoma	NS	2.60745	0.334249
PATU8902_PANCREAS	PA-TU-8902	F	pancreas	carcinoma	ductal_carcinoma	2.96419	0.330769
RH18_SOFT_TISSUE	RH-18	unknown	soft_tissue	rhabdomyosarcoma	alveolar	11.1954	0.330482
L540_HAEMATOPOIETIC_AND_LYMPHOID_TISSUE	L-540	F	haematopoietic_and_lymphoid_tissue	lymphoid_neoplasm	Hodgkin_lymphoma	9.63168	0.328844
RPMI7951_SKIN	RPMI-7951	F	skin	malignant_melanoma	NS	1.49043	0.322953
KE97_HAEMATOPOIETIC_AND_LYMPHOID_TISSUE	KE-97	M	haematopoietic_and_lymphoid_tissue	lymphoid_neoplasm	plasma_cell_myeloma	10.9105	0.32211
SNU1041_UPPER_AERODIGESTIVE_TRACT	SNU-1041	unknown	upper_aerodigestive_tract	carcinoma	NS	1.22514	0.318416
ACCMESO1_PLEURA	ACC-MESO-1	unknown	pleura	mesothelioma	NS	0.4848	0.318138
MDAMB415_BREAST	MDA-MB-415	F	breast	carcinoma	NS	0.53417	0.317771
L428_HAEMATOPOIETIC_AND_LYMPHOID_TISSUE	L-428	F	haematopoietic_and_lymphoid_tissue	lymphoid_neoplasm	Hodgkin_lymphoma	1.34903	0.317456
OE21_OESOPHAGUS	OE21	M	oesophagus	carcinoma	squamous_cell_carcinoma	0.537035	0.316218
NCIH1792_LUNG	NCI-H1792	M	lung	carcinoma	adenocarcinoma	1.74387	0.311767
SNU899_UPPER_AERODIGESTIVE_TRACT	SNU-899	M	upper_aerodigestive_tract	carcinoma	squamous_cell_carcinoma	4.68784	0.309933
L33_PANCREAS	L3.3	unknown	pancreas	carcinoma	NS	0.520233	0.309589
ACHN_KIDNEY	ACHN	M	kidney	carcinoma	renal_cell_carcinoma	2.97568	0.305554
COLO800_SKIN	COLO-800	unknown	skin	malignant_melanoma	NS	0.787354	0.302663
MFE296_ENDOMETRIUM	MFE-296	F	endometrium	carcinoma	adenocarcinoma	0.431223	0.301714
JHUEM2_ENDOMETRIUM	JHUEM-2	F	endometrium	carcinoma	adenocarcinoma	0.252619	0.300122
PC3_PROSTATE	PC-3	M	prostate	carcinoma	adenocarcinoma	3.65493	0.299392
769P_KIDNEY	769-P	F	kidney	carcinoma	clear_cell_renal_cell_carcinoma	1.3768	0.294924
SF295_CENTRAL_NERVOUS_SYSTEM	SF-295	unknown	central_nervous_system	glioma	astrocytoma_Grade_IV	2.90506	0.294647
HS343T_BREAST	Hs 343.T	F	breast	carcinoma	NS	2.60526	0.292779
TE15_OESOPHAGUS	TE-15	F	oesophagus	carcinoma	squamous_cell_carcinoma	1.7906	0.287215
ONS76_CENTRAL_NERVOUS_SYSTEM	ONS-76	F	central_nervous_system	primitive_neuroectodermal_tumour-medulloblastoma	NS	8.1912	0.287194
NCIH1435_LUNG	NCI-H1435	F	lung	carcinoma	non_small_cell_carcinoma	0.937725	0.286523
KIJK_HAEMATOPOIETIC_AND_LYMPHOID_TISSUE	Ki-JK	M	haematopoietic_and_lymphoid_tissue	lymphoid_neoplasm	anaplastic_large_cell_lymphoma	47.1976	0.285878
T24_URINARY_TRACT	T24	F	urinary_tract	carcinoma	transitional_cell_carcinoma	11.856	0.285629
NCIH2452_PLEURA	NCI-H2452	M	pleura	mesothelioma	NS	2.64512	0.282648
HCC44_LUNG	HCC-44	F	lung	carcinoma	adenocarcinoma	44.0171	0.28232
RERFLCMS_LUNG	RERF-LC-MS	unknown	lung	carcinoma	non_small_cell_carcinoma	1.39091	0.281635
PECAPJ34CLONEC12_UPPER_AERODIGESTIVE_TRACT	PE/CA-PJ34 (clone C12)	M	upper_aerodigestive_tract	carcinoma	squamous_cell_carcinoma	2.38149	0.280887
2313287_STOMACH	23132/87	M	stomach	carcinoma	adenocarcinoma	1.17845	0.279064
SCC15_UPPER_AERODIGESTIVE_TRACT	SCC-15	M	upper_aerodigestive_tract	carcinoma	squamous_cell_carcinoma	3.25537	0.278735
SNUC1_LARGE_INTESTINE	SNU-C1	M	large_intestine	carcinoma	adenocarcinoma	0.100336	0.277982
CALU6_LUNG	Calu-6	F	lung	carcinoma	undifferentiated_carcinoma	0.245723	0.274113
DEL_HAEMATOPOIETIC_AND_LYMPHOID_TISSUE	DEL	M	haematopoietic_and_lymphoid_tissue	lymphoid_neoplasm	NS	124.369	0.273875
FU97_STOMACH	FU97	F	stomach	carcinoma	diffuse_adenocarcinoma	0.12595	0.270343
NCIH1975_LUNG	NCI-H1975	F	lung	carcinoma	non_small_cell_carcinoma	7.09769	0.270003
MOLP8_HAEMATOPOIETIC_AND_LYMPHOID_TISSUE	MOLP-8	M	haematopoietic_and_lymphoid_tissue	lymphoid_neoplasm	plasma_cell_myeloma	0.128893	0.267984
TOV21G_OVARY	TOV-21G	F	ovary	carcinoma	clear_cell_carcinoma	0.532115	0.267431
NCIH2110_LUNG	NCI-H2110	unknown	lung	carcinoma	non_small_cell_carcinoma	4.75475	0.259076
SNU1066_UPPER_AERODIGESTIVE_TRACT	SNU-1066	M	upper_aerodigestive_tract	carcinoma	squamous_cell_carcinoma	3.35386	0.259025
JMSU1_URINARY_TRACT	JMSU-1	M	urinary_tract	carcinoma	NS	27.0316	0.258714
SKNFI_AUTONOMIC_GANGLIA	SK-N-FI	M	autonomic_ganglia	neuroblastoma	NS	0.768618	0.258701
AN3CA_ENDOMETRIUM	AN3 CA	F	endometrium	carcinoma	adenocarcinoma	0.750206	0.258043
HUH1_LIVER	huH-1	M	liver	carcinoma	hepatocellular_carcinoma	0.0656239	0.257154
SNU601_STOMACH	SNU-601	M	stomach	carcinoma	NS	0.477543	0.256517
CL40_LARGE_INTESTINE	CL-40	F	large_intestine	carcinoma	NS	0.644926	0.255466
SNU719_STOMACH	SNU-719	M	stomach	carcinoma	NS	0.441385	0.252629
						0.19023	0.251312
PK59_PANCREAS	PK-59	unknown	pancreas	carcinoma	NS	9.65402	0.243434
LK2_LUNG	LK-2	M	lung	carcinoma	squamous_cell_carcinoma	0.585247	0.241531
HS822T_BONE	Hs 822.T	F	bone	Ewings_sarcoma-peripheral_primitive_neuroectodermal_tumour	NS	0.431437	0.240382
TYKNU_OVARY	TYK-nu	F	ovary	carcinoma	undifferentiated_carcinoma	1.94265	0.23994
IGR37_SKIN	IGR-37	M	skin	malignant_melanoma	NS	0.287362	0.238046
NCIH292_LUNG	NCI-H292	F	lung	carcinoma	mucoepidermoid_carcinoma	24.6907	0.236913
NCIN87_STOMACH	NCI-N87	M	stomach	carcinoma	NS	0.756799	0.2344
AGS_STOMACH	AGS	F	stomach	carcinoma	adenocarcinoma	0.681579	0.232265
						4.74529	0.232164
RERFLCAD1_LUNG	RERF-LC-Ad1	M	lung	carcinoma	adenocarcinoma	15.3449	0.230889
COLO680N_OESOPHAGUS	COLO-680N	F	oesophagus	carcinoma	squamous_cell_carcinoma	4.94843	0.2305
YKG1_CENTRAL_NERVOUS_SYSTEM	YKG1	F	central_nervous_system	glioma	astrocytoma_Grade_IV	1.11687	0.229919
HCC2108_LUNG	HCC-2108	M	lung	carcinoma	adenocarcinoma	0.332099	0.229379
HCC827_LUNG	HCC827	F	lung	carcinoma	adenocarcinoma	11.4008	0.228381
HS839T_SKIN	Hs 839.T	F	skin	malignant_melanoma	NS	0.284087	0.226534
QGP1_PANCREAS	QGP-1	unknown	pancreas	carcinoma	NS	0.829236	0.22646
RT112_URINARY_TRACT	RT-112	F	urinary_tract	carcinoma	transitional_cell_carcinoma	1.05651	0.222012
HEC251_ENDOMETRIUM	HEC-251	F	endometrium	carcinoma	adenocarcinoma	0.527647	0.221458
HS281T_BREAST	Hs 281.T	F	breast	carcinoma	NS	10.17	0.22126
HSC2_UPPER_AERODIGESTIVE_TRACT	HSC-2	M	upper_aerodigestive_tract	carcinoma	squamous_cell_carcinoma	1.10246	0.220102
NCIH1385_LUNG	NCI-H1385	F	lung	carcinoma	squamous_cell_carcinoma	0.194024	0.217716
						0.358427	0.217187
NCIH2009_LUNG	NCI-H2009	F	lung	carcinoma	adenocarcinoma	13.0108	0.215492
CL11_LARGE_INTESTINE	CL-11	unknown	large_intestine	carcinoma	adenocarcinoma	1.20358	0.213208
SNU449_LIVER	SNU-449	M	liver	carcinoma	hepatocellular_carcinoma	3.3948	0.211722
PATU8988T_PANCREAS	PA-TU-8988T	F	pancreas	carcinoma	ductal_carcinoma	0.123223	0.210872
NCIH854_LUNG	NCI-H854	unknown	lung	carcinoma	adenocarcinoma	0.00976077	0.206805
JJN3_HAEMATOPOIETIC_AND_LYMPHOID_TISSUE	JJN-3	F	haematopoietic_and_lymphoid_tissue	lymphoid_neoplasm	plasma_cell_myeloma	0	0.20592
CAOV4_OVARY	Caov-4	F	ovary	carcinoma	adenocarcinoma	0.139364	0.203901
SKUT1_SOFT_TISSUE	SK-UT-1	F	soft_tissue	leiomyosarcoma	NS	0.28155	0.203654
HSC3_UPPER_AERODIGESTIVE_TRACT	HSC-3	M	upper_aerodigestive_tract	carcinoma	squamous_cell_carcinoma	25.8948	0.201991
MIAPACA2_PANCREAS	MIA PaCa-2	M	pancreas	carcinoma	ductal_carcinoma	0.274025	0.200633
HEC265_ENDOMETRIUM	HEC-265	F	endometrium	carcinoma	adenocarcinoma	5.35825	0.200379
HS944T_SKIN	Hs 944.T	M	skin	malignant_melanoma	NS	3.28351	0.199722
NCIH524_LUNG	NCI-H524	M	lung	carcinoma	small_cell_carcinoma	0.0383671	0.198417
COLO741_SKIN	COLO 741	F	skin	malignant_melanoma	NS	0.177913	0.195892
HGC27_STOMACH	HGC-27	unknown	stomach	carcinoma	undifferentiated_adenocarcinoma	0.0474399	0.195073
ONCODG1_OVARY	ONCO-DG-1	F	ovary	carcinoma	adenocarcinoma	0.151806	0.194603
COV318_OVARY	COV318	F	ovary	carcinoma	NS	0.338713	0.194143
VCAP_PROSTATE	VCaP	M	prostate	carcinoma	adenocarcinoma	0.200587	0.193957
KE39_STOMACH	KE-39	M	stomach	carcinoma	NS	0.755742	0.193458
SKMES1_LUNG	SK-MES-1	M	lung	carcinoma	squamous_cell_carcinoma	8.89054	0.192455
HS616T_HAEMATOPOIETIC_AND_LYMPHOID_TISSUE	Hs 616.T	M	haematopoietic_and_lymphoid_tissue	lymphoid_neoplasm	Hodgkin_lymphoma	0.282713	0.192184
HEL9217_HAEMATOPOIETIC_AND_LYMPHOID_TISSUE	HEL 92.1.7	M	haematopoietic_and_lymphoid_tissue	haematopoietic_neoplasm	acute_myeloid_leukaemia	7.01942	0.191229
GMS10_CENTRAL_NERVOUS_SYSTEM	GMS-10	M	central_nervous_system	glioma	astrocytoma_Grade_IV	11.63	0.190839
KMS34_HAEMATOPOIETIC_AND_LYMPHOID_TISSUE	KMS-34	F	haematopoietic_and_lymphoid_tissue	lymphoid_neoplasm	plasma_cell_myeloma	0.552498	0.189142
TE9_OESOPHAGUS	TE-9	M	oesophagus	carcinoma	squamous_cell_carcinoma	0.171148	0.188838
RERFLCAI_LUNG	RERF-LC-AI	M	lung	carcinoma	squamous_cell_carcinoma	5.21891	0.184878
LS1034_LARGE_INTESTINE	LS1034	M	large_intestine	carcinoma	adenocarcinoma	0.102835	0.184212
ESS1_ENDOMETRIUM	ESS-1	F	endometrium	carcinoma	carcinosarcoma-malignant_mesodermal_mixed_tumour	4.50378	0.183166
HS255T_LARGE_INTESTINE	Hs 255.T	F	large_intestine	carcinoma	adenocarcinoma	2.81228	0.182899
MDAMB436_BREAST	MDA-MB-436	F	breast	carcinoma	NS	1.5383	0.182775
OVK18_OVARY	OVK18	unknown	ovary	carcinoma	endometrioid_carcinoma	0.193968	0.182667
SNU61_LARGE_INTESTINE	SNU-61	M	large_intestine	carcinoma	NS	0.321645	0.181784
KNS81_CENTRAL_NERVOUS_SYSTEM	KNS-81	M	central_nervous_system	glioma	astrocytoma_Grade_IV	9.56919	0.17854
NCIH889_LUNG	NCI-H889	F	lung	carcinoma	small_cell_carcinoma	0.358525	0.177288
639V_URINARY_TRACT	639-V	M	urinary_tract	carcinoma	transitional_cell_carcinoma	3.15081	0.176195
DBTRG05MG_CENTRAL_NERVOUS_SYSTEM	DBTRG-05MG	F	central_nervous_system	glioma	astrocytoma_Grade_IV	21.1561	0.176077
CHP212_AUTONOMIC_GANGLIA	CHP-212	unknown	autonomic_ganglia	neuroblastoma	NS	1.10678	0.176036
NALM6_HAEMATOPOIETIC_AND_LYMPHOID_TISSUE	NALM-6	M	haematopoietic_and_lymphoid_tissue	lymphoid_neoplasm	acute_lymphoblastic_B_cell_leukaemia	0.748309	0.17476
H4_CENTRAL_NERVOUS_SYSTEM	H4	M	central_nervous_system	glioma	NS	0.747313	0.172574
LS180_LARGE_INTESTINE	LS 180	F	large_intestine	carcinoma	adenocarcinoma	0.220348	0.170155
PECAPJ15_UPPER_AERODIGESTIVE_TRACT	PE/CA-PJ15	M	upper_aerodigestive_tract	carcinoma	squamous_cell_carcinoma	2.15644	0.169724
HEC151_ENDOMETRIUM	HEC-151	F	endometrium	carcinoma	adenocarcinoma	2.00845	0.168301
SW579_THYROID	SW579	M	thyroid	carcinoma	anaplastic_carcinoma	0.700525	0.166723
LS411N_LARGE_INTESTINE	LS411N	M	large_intestine	carcinoma	adenocarcinoma	0.295033	0.166454
UACC257_SKIN	UACC-257	unknown	skin	malignant_melanoma	NS	0.285191	0.165771
SNU475_LIVER	SNU-475	M	liver	carcinoma	hepatocellular_carcinoma	1.18193	0.164577
HCC1438_LUNG	HCC-1438	M	lung	carcinoma	large_cell_carcinoma	2.42094	0.164473
KYSE150_OESOPHAGUS	KYSE-150	F	oesophagus	carcinoma	squamous_cell_carcinoma	12.2894	0.163699
KMS12BM_HAEMATOPOIETIC_AND_LYMPHOID_TISSUE	KMS-12-BM	F	haematopoietic_and_lymphoid_tissue	lymphoid_neoplasm	plasma_cell_myeloma	0.121305	0.163142
JHOM2B_OVARY	JHOM-2B	unknown	ovary	carcinoma	adenocarcinoma	0.852053	0.162545
KU1919_URINARY_TRACT	KU-19-19	M	urinary_tract	carcinoma	transitional_cell_carcinoma	7.66953	0.162215
DANG_PANCREAS	DAN-G	unknown	pancreas	carcinoma	NS	6.28514	0.161047
SQ1_LUNG	Sq-1	unknown	lung	carcinoma	squamous_cell_carcinoma	12.2144	0.160538
CAPAN1_PANCREAS	Capan-1	M	pancreas	carcinoma	ductal_carcinoma	0.770323	0.160489
SUPT1_HAEMATOPOIETIC_AND_LYMPHOID_TISSUE	SUP-T1	M	haematopoietic_and_lymphoid_tissue	lymphoid_neoplasm	acute_lymphoblastic_T_cell_leukaemia	0.123038	0.160368
SNU466_CENTRAL_NERVOUS_SYSTEM	SNU-466	M	central_nervous_system	glioma	astrocytoma_Grade_IV	0.132633	0.159909
HMC18_BREAST	HMC-1-8	F	breast	carcinoma	NS	0.329143	0.159527
NCCSTCK140_STOMACH	NCC-StC-K140	unknown	stomach	carcinoma	NS	9.69386	0.159456
KMS28BM_HAEMATOPOIETIC_AND_LYMPHOID_TISSUE	KMS-28BM	F	haematopoietic_and_lymphoid_tissue	lymphoid_neoplasm	plasma_cell_myeloma	0.174284	0.159188
ISTMES2_PLEURA	IST-MES2	M	pleura	mesothelioma	NS	2.15971	0.158917
DMS454_LUNG	DMS 454	M	lung	carcinoma	small_cell_carcinoma	0.844735	0.1583
NB1_AUTONOMIC_GANGLIA	NB-1	M	autonomic_ganglia	neuroblastoma	NS	0	0.158073
SW1463_LARGE_INTESTINE	SW1463	F	large_intestine	carcinoma	adenocarcinoma	0.325515	0.156448
HS695T_SKIN	Hs 695T	M	skin	malignant_melanoma	NS	0.418275	0.155387
PK45H_PANCREAS	PK-45H	unknown	pancreas	carcinoma	NS	2.97713	0.15508
K029AX_SKIN	K029AX	unknown	skin	malignant_melanoma	NS	0.163142	0.153279
SNUC2A_LARGE_INTESTINE	SNU-C2A	F	large_intestine	carcinoma	adenocarcinoma	0.824778	0.152486
SNU1197_LARGE_INTESTINE	SNU-1197	M	large_intestine	carcinoma	NS	8.7458	0.152317
JHH5_LIVER	JHH-5	M	liver	carcinoma	hepatocellular_carcinoma	0.0325602	0.152192
SNU201_CENTRAL_NERVOUS_SYSTEM	SNU-201	M	central_nervous_system	glioma	astrocytoma_Grade_IV	2.51976	0.151343
LI7_LIVER	Li-7	unknown	liver	carcinoma	hepatocellular_carcinoma	1.43097	0.15106
COV362_OVARY	COV362	F	ovary	carcinoma	NS	0.236692	0.150947
NCIH358_LUNG	NCI-H358	M	lung	carcinoma	bronchioloalveolar_adenocarcinoma	6.46285	0.147849
CAKI2_KIDNEY	Caki-2	M	kidney	carcinoma	clear_cell_renal_cell_carcinoma	5.03048	0.147792
HS939T_SKIN	Hs 939.T	F	skin	malignant_melanoma	NS	1.13245	0.147475
COLO684_ENDOMETRIUM	COLO 684	F	endometrium	carcinoma	adenocarcinoma	0.13189	0.146831
HCC1171_LUNG	HCC-1171	M	lung	carcinoma	non_small_cell_carcinoma	27.0656	0.146781
HT144_SKIN	HT-144	M	skin	malignant_melanoma	NS	0.100529	0.146352
TEN_ENDOMETRIUM	TEN	F	endometrium	carcinoma	clear_cell_carcinoma	0.297166	0.144967
HS578T_BREAST	Hs 578T	F	breast	carcinoma	ductal_carcinoma	4.78155	0.144643
SKCO1_LARGE_INTESTINE	SK-CO-1	M	large_intestine	carcinoma	adenocarcinoma	0.0528088	0.144559
ABC1_LUNG	ABC-1	M	lung	carcinoma	non_small_cell_carcinoma	0.804458	0.14454
NB4_HAEMATOPOIETIC_AND_LYMPHOID_TISSUE	NB-4	F	haematopoietic_and_lymphoid_tissue	haematopoietic_neoplasm	acute_myeloid_leukaemia	0.136822	0.144077
EFM192A_BREAST	EFM-192A	F	breast	carcinoma	NS	0.124064	0.143625
HCC4006_LUNG	HCC4006	M	lung	carcinoma	adenocarcinoma	53.2787	0.143372
SW1353_BONE	SW 1353	F	bone	chondrosarcoma	NS	5.41138	0.141987
HS821T_BONE	Hs 821.T	F	bone	giant_cell_tumour	NS	1.44585	0.141339
SU8686_PANCREAS	SU.86.86	F	pancreas	carcinoma	ductal_carcinoma	6.97661	0.141098
KMS11_HAEMATOPOIETIC_AND_LYMPHOID_TISSUE	KMS-11	F	haematopoietic_and_lymphoid_tissue	lymphoid_neoplasm	plasma_cell_myeloma	0	0.140346
ISHIKAWAHERAKLIO02ER_ENDOMETRIUM	Ishikawa (Heraklio) 02 ER-	F	endometrium	carcinoma	adenocarcinoma	0.468064	0.138501
HCC38_BREAST	HCC38	F	breast	carcinoma	ductal_carcinoma	3.00421	0.137556
NCIH2122_LUNG	NCI-H2122	F	lung	carcinoma	adenocarcinoma	1.75774	0.137448
DMS79_LUNG	DMS 79	unknown	lung	carcinoma	small_cell_carcinoma	1.44684	0.135019
						9.80996	0.134001
NCIH2405_LUNG	NCI-H2405	M	lung	carcinoma	adenocarcinoma	0.333998	0.133333
TO175T_HAEMATOPOIETIC_AND_LYMPHOID_TISSUE	TO 175.T	M	haematopoietic_and_lymphoid_tissue	lymphoid_neoplasm	Hodgkin_lymphoma	0.0972541	0.133107
MELHO_SKIN	MEL-HO	F	skin	malignant_melanoma	NS	1.04715	0.132606
LXF289_LUNG	LXF-289	M	lung	carcinoma	adenocarcinoma	17.3673	0.131338
MSTO211H_PLEURA	MSTO-211H	M	pleura	mesothelioma	NS	4.53686	0.130826
HS863T_BONE	Hs 863.T	F	bone	Ewings_sarcoma-peripheral_primitive_neuroectodermal_tumour	NS	1.53931	0.130596
COLO679_SKIN	COLO-679	F	skin	malignant_melanoma	NS	0.427693	0.128396
HCT116_LARGE_INTESTINE	HCT 116	M	large_intestine	carcinoma	NS	0.859072	0.128098
KALS1_CENTRAL_NERVOUS_SYSTEM	KALS-1	F	central_nervous_system	glioma	NS	14.6277	0.1257
SNU245_BILIARY_TRACT	SNU-245	unknown	biliary_tract	carcinoma	NS	0.085516	0.124225
C2BBE1_LARGE_INTESTINE	C2BBe1	M	large_intestine	carcinoma	adenocarcinoma	0.0874575	0.123819
ASPC1_PANCREAS	AsPC-1	F	pancreas	carcinoma	ductal_carcinoma	0.0385909	0.123449
T3M4_PANCREAS	T3M-4	M	pancreas	carcinoma	ductal_carcinoma	0.420976	0.123355
COV434_OVARY	COV434	F	ovary	sex_cord-stromal_tumour	granulosa_cell_tumour	0.268657	0.1233
NCIH1930_LUNG	NCI-H1930	M	lung	carcinoma	small_cell_carcinoma	0.852263	0.122795
OPM2_HAEMATOPOIETIC_AND_LYMPHOID_TISSUE	OPM-2	F	haematopoietic_and_lymphoid_tissue	lymphoid_neoplasm	plasma_cell_myeloma	0.579898	0.122257
BT483_BREAST	BT-483	F	breast	carcinoma	ductal_carcinoma	0.402202	0.121768
NH6_AUTONOMIC_GANGLIA	NH-6	unknown	autonomic_ganglia	neuroblastoma	NS	1.85605	0.120099
HS840T_UPPER_AERODIGESTIVE_TRACT	Hs 840.T	M	upper_aerodigestive_tract	other	papilloma	11.2931	0.119041
RT4_URINARY_TRACT	RT4	M	urinary_tract	carcinoma	transitional_cell_carcinoma	0.117186	0.118734
SNU349_KIDNEY	SNU-349	M	kidney	carcinoma	clear_cell_renal_cell_carcinoma	10.2966	0.118351
NCIH2030_LUNG	NCI-H2030	M	lung	carcinoma	non_small_cell_carcinoma	1.91154	0.117956
HCC2279_LUNG	HCC-2279	F	lung	carcinoma	adenocarcinoma	1.01275	0.117859
SH10TC_STOMACH	SH-10-TC	unknown	stomach	carcinoma	NS	6.39339	0.117819
KYSE510_OESOPHAGUS	KYSE-510	F	oesophagus	carcinoma	squamous_cell_carcinoma	0.472793	0.117204
BXPC3_PANCREAS	BxPC-3	F	pancreas	carcinoma	ductal_carcinoma	3.84646	0.116836
SF126_CENTRAL_NERVOUS_SYSTEM	SF126	unknown	central_nervous_system	glioma	astrocytoma	3.96225	0.116471
OC314_OVARY	OC 314	F	ovary	carcinoma	serous_carcinoma	0.93154	0.115578
SNU16_STOMACH	SNU-16	F	stomach	carcinoma	undifferentiated_adenocarcinoma	0.585931	0.11514
UACC62_SKIN	UACC-62	unknown	skin	malignant_melanoma	NS	0.0448206	0.115053
						5.54863	0.114951
SKMEL3_SKIN	SK-MEL-3	F	skin	malignant_melanoma	NS	0.185289	0.113732
BICR31_UPPER_AERODIGESTIVE_TRACT	BICR 31	M	upper_aerodigestive_tract	carcinoma	squamous_cell_carcinoma	0.482285	0.11124
MKN45_STOMACH	MKN-45	F	stomach	carcinoma	diffuse_adenocarcinoma	0.118537	0.111147
A549_LUNG	A549	M	lung	carcinoma	non_small_cell_carcinoma	2.11489	0.110081
NCIH1339_LUNG	NCI-H1339	F	lung	carcinoma	small_cell_carcinoma	6.0852	0.109377
WM115_SKIN	WM-115	F	skin	malignant_melanoma	NS	0.131851	0.109304
SNU685_ENDOMETRIUM	SNU-685	F	endometrium	carcinoma	carcinosarcoma-malignant_mesodermal_mixed_tumour	9.80111	0.109112
DETROIT562_UPPER_AERODIGESTIVE_TRACT	Detroit 562	F	upper_aerodigestive_tract	carcinoma	NS	2.09182	0.108917
MDAMB435S_SKIN	MDA-MB-435S	F	skin	malignant_melanoma	NS	0.276796	0.108751
COLO678_LARGE_INTESTINE	COLO-678	M	large_intestine	carcinoma	adenocarcinoma	0.534884	0.108289
HS895T_SKIN	Hs 895.T	F	skin	malignant_melanoma	NS	7.92491	0.108055
SCC25_UPPER_AERODIGESTIVE_TRACT	SCC-25	M	upper_aerodigestive_tract	carcinoma	squamous_cell_carcinoma	2.48625	0.107674
NCIH1651_LUNG	NCI-H1651	M	lung	carcinoma	adenocarcinoma	0.294616	0.106647
P3HR1_HAEMATOPOIETIC_AND_LYMPHOID_TISSUE	P3HR-1	M	haematopoietic_and_lymphoid_tissue	lymphoid_neoplasm	Burkitt_lymphoma	0.183249	0.105533
WM1799_SKIN	WM1799	unknown	skin	malignant_melanoma	NS	0.465903	0.105334
DMS273_LUNG	DMS 273	F	lung	carcinoma	small_cell_carcinoma	0.112586	0.104977
PATU8988S_PANCREAS	PA-TU-8988S	F	pancreas	carcinoma	ductal_carcinoma	0.0155546	0.104641
SW620_LARGE_INTESTINE	SW620	M	large_intestine	carcinoma	adenocarcinoma	0.109468	0.103984
SNU213_PANCREAS	SNU-213	M	pancreas	carcinoma	NS	5.89464	0.103944
SNU8_OVARY	SNU-8	F	ovary	carcinoma	adenocarcinoma	12.8589	0.10329
OV90_OVARY	OV-90	F	ovary	carcinoma	mixed_carcinoma	0	0.103063
RCM1_LARGE_INTESTINE	RCM-1	unknown	large_intestine	carcinoma	adenocarcinoma	0.301214	0.102792
DMS153_LUNG	DMS 153	M	lung	carcinoma	small_cell_carcinoma	1.74493	0.102487
LS513_LARGE_INTESTINE	LS513	M	large_intestine	carcinoma	adenocarcinoma	0.126389	0.102403
MESSA_SOFT_TISSUE	MES-SA	F	soft_tissue	sarcoma	NS	0.0113597	0.10099
HS870T_BONE	Hs 870.T	unknown	bone	osteosarcoma	NS	1.64015	0.0998075
PLCPRF5_LIVER	PLC/PRF/5	M	liver	carcinoma	hepatocellular_carcinoma	0.220543	0.0994969
CW2_LARGE_INTESTINE	CW-2	unknown	large_intestine	carcinoma	NS	1.09848	0.0992412
CCFSTTG1_CENTRAL_NERVOUS_SYSTEM	CCF-STTG1	F	central_nervous_system	glioma	astrocytoma	4.04442	0.0990626
SNU1077_ENDOMETRIUM	SNU-1077	F	endometrium	carcinoma	carcinosarcoma-malignant_mesodermal_mixed_tumour	0.997934	0.098895
BEN_LUNG	BEN	M	lung	carcinoma	NS	0.491255	0.0983351
P31FUJ_HAEMATOPOIETIC_AND_LYMPHOID_TISSUE	P31/FUJ	M	haematopoietic_and_lymphoid_tissue	haematopoietic_neoplasm	acute_myeloid_leukaemia	0.150188	0.0981506
MEWO_SKIN	MeWo	M	skin	malignant_melanoma	NS	0.0597231	0.0975685
HS606T_BREAST	Hs 606.T	F	breast	carcinoma	NS	2.00435	0.0973641
NCIH2085_LUNG	NCI-H2085	M	lung	carcinoma	adenocarcinoma	16.1536	0.0972572
NCIH1437_LUNG	NCI-H1437	M	lung	carcinoma	adenocarcinoma	0.458085	0.0972542
GAMG_CENTRAL_NERVOUS_SYSTEM	GAMG	F	central_nervous_system	glioma	NS	2.6048	0.0958625
MELJUSO_SKIN	MEL-JUSO	F	skin	malignant_melanoma	NS	0.190617	0.0952917
HT115_LARGE_INTESTINE	HT115	unknown	large_intestine	carcinoma	NS	0.391516	0.0949027
HS888T_BONE	Hs 888.T	M	bone	osteosarcoma	NS	2.53952	0.0946896
A101D_SKIN	A101D	M	skin	malignant_melanoma	NS	0.338822	0.0943746
MOLM16_HAEMATOPOIETIC_AND_LYMPHOID_TISSUE	MOLM-16	F	haematopoietic_and_lymphoid_tissue	haematopoietic_neoplasm	acute_myeloid_leukaemia	0.168605	0.09398
MFE280_ENDOMETRIUM	MFE-280	F	endometrium	carcinoma	adenocarcinoma	0.291207	0.093719
NCIH510_LUNG	NCI-H510	M	lung	carcinoma	small_cell_carcinoma	0.702083	0.0931031
SW1990_PANCREAS	SW 1990	M	pancreas	carcinoma	ductal_carcinoma	6.89489	0.0924069
CAKI1_KIDNEY	Caki-1	M	kidney	carcinoma	clear_cell_renal_cell_carcinoma	0.451573	0.0918934
HS688AT_SKIN	Hs 688(A).T	M	skin	malignant_melanoma	NS	1.71246	0.0915843
LOVO_LARGE_INTESTINE	LoVo	M	large_intestine	carcinoma	adenocarcinoma	0.81006	0.0914132
U2OS_BONE	U-2 OS	F	bone	osteosarcoma	NS	0.861908	0.0899094
MDAMB134VI_BREAST	MDA-MB-134-VI	F	breast	carcinoma	ductal_carcinoma	0.173652	0.0897192
SNU738_CENTRAL_NERVOUS_SYSTEM	SNU-738	M	central_nervous_system	glioma	oligodendroglioma	1.77231	0.0890184
KYSE450_OESOPHAGUS	KYSE-450	M	oesophagus	carcinoma	squamous_cell_carcinoma	0.400694	0.0887918
GI1_CENTRAL_NERVOUS_SYSTEM	GI-1	M	central_nervous_system	glioma	gliosarcoma	0.825735	0.088647
KNS42_CENTRAL_NERVOUS_SYSTEM	KNS-42	M	central_nervous_system	glioma	NS	0.221889	0.0871318
EFE184_ENDOMETRIUM	EFE-184	F	endometrium	carcinoma	NS	0.236326	0.0866953
JHH1_LIVER	JHH-1	M	liver	carcinoma	hepatocellular_carcinoma	0.130944	0.086654
HOS_BONE	HOS	F	bone	osteosarcoma	NS	4.15235	0.0862277
NCIH929_HAEMATOPOIETIC_AND_LYMPHOID_TISSUE	NCI-H929	F	haematopoietic_and_lymphoid_tissue	lymphoid_neoplasm	plasma_cell_myeloma	0.0189464	0.085647
HMCB_SKIN	HMCB	unknown	skin	malignant_melanoma	NS	0.154932	0.0854193
NCIH1355_LUNG	NCI-H1355	M	lung	carcinoma	adenocarcinoma	0.482897	0.085264
MOLP2_HAEMATOPOIETIC_AND_LYMPHOID_TISSUE	MOLP-2	M	haematopoietic_and_lymphoid_tissue	lymphoid_neoplasm	plasma_cell_myeloma	0.87719	0.0842286
IGROV1_OVARY	IGROV1	F	ovary	carcinoma	adenocarcinoma	0	0.0839469
8305C_THYROID	8305C	F	thyroid	carcinoma	anaplastic_carcinoma	31.1395	0.0837709
SNU489_CENTRAL_NERVOUS_SYSTEM	SNU-489	M	central_nervous_system	glioma	astrocytoma_Grade_IV	4.0243	0.0836742
HS934T_SKIN	Hs 934.T	F	skin	malignant_melanoma	NS	0.616308	0.0836599
NCIH1838_LUNG	NCI-H1838	F	lung	carcinoma	non_small_cell_carcinoma	7.59672	0.0835196
JHH6_LIVER	JHH-6	F	liver	carcinoma	hepatocellular_carcinoma	14.2645	0.0826534
KMM1_HAEMATOPOIETIC_AND_LYMPHOID_TISSUE	KMM-1	M	haematopoietic_and_lymphoid_tissue	lymphoid_neoplasm	plasma_cell_myeloma	0.0977782	0.0825211
NCIH2066_LUNG	NCI-H2066	F	lung	carcinoma	small_cell_carcinoma	0.0735972	0.0821608
OCUM1_STOMACH	OCUM-1	F	stomach	carcinoma	diffuse_adenocarcinoma	0.121883	0.0821126
SNU1_STOMACH	SNU-1	M	stomach	carcinoma	undifferentiated_adenocarcinoma	0.0480619	0.0820102
NCIH520_LUNG	NCI-H520	M	lung	carcinoma	squamous_cell_carcinoma	0.29359	0.0818121
TE441T_SOFT_TISSUE	TE 441.T	F	soft_tissue	rhabdomyosarcoma	NS	0.00714964	0.0817723
KHM1B_HAEMATOPOIETIC_AND_LYMPHOID_TISSUE	KHM-1B	M	haematopoietic_and_lymphoid_tissue	lymphoid_neoplasm	plasma_cell_myeloma	0.0194796	0.0812936
WM2664_SKIN	WM-266-4	F	skin	malignant_melanoma	NS	0.279245	0.0809863
BICR18_UPPER_AERODIGESTIVE_TRACT	BICR 18	M	upper_aerodigestive_tract	carcinoma	squamous_cell_carcinoma	0.0308596	0.0805273
NCIH1623_LUNG	NCI-H1623	M	lung	carcinoma	adenocarcinoma	0.585625	0.0804266
SUDHL10_HAEMATOPOIETIC_AND_LYMPHOID_TISSUE	SU-DHL-10	M	haematopoietic_and_lymphoid_tissue	lymphoid_neoplasm	diffuse_large_B_cell_lymphoma	0.12766	0.0800584
RCHACV_HAEMATOPOIETIC_AND_LYMPHOID_TISSUE	RCH-ACV	F	haematopoietic_and_lymphoid_tissue	lymphoid_neoplasm	acute_lymphoblastic_B_cell_leukaemia	0.193962	0.0799536
DKMG_CENTRAL_NERVOUS_SYSTEM	DK-MG	F	central_nervous_system	glioma	astrocytoma_Grade_IV	1.3867	0.0799049
HT29_LARGE_INTESTINE	HT-29	F	large_intestine	carcinoma	adenocarcinoma	0.131438	0.0787857
CL14_LARGE_INTESTINE	CL-14	M	large_intestine	carcinoma	NS	0.178154	0.0784436
JHUEM1_ENDOMETRIUM	JHUEM-1	F	endometrium	carcinoma	adenocarcinoma	0.0906097	0.0782534
BICR6_UPPER_AERODIGESTIVE_TRACT	BICR 6	M	upper_aerodigestive_tract	carcinoma	squamous_cell_carcinoma	0.361252	0.0781892
JHH7_LIVER	JHH-7	M	liver	carcinoma	hepatocellular_carcinoma	0.196679	0.0774602
RERFLCAD2_LUNG	RERF-LC-Ad2	M	lung	carcinoma	adenocarcinoma	15.8374	0.0765094
RAJI_HAEMATOPOIETIC_AND_LYMPHOID_TISSUE	Raji	M	haematopoietic_and_lymphoid_tissue	lymphoid_neoplasm	Burkitt_lymphoma	0.328563	0.0762137
KP3_PANCREAS	KP-3	unknown	pancreas	carcinoma	ductal_carcinoma	0.113201	0.0760468
NALM19_HAEMATOPOIETIC_AND_LYMPHOID_TISSUE	NALM-19	M	haematopoietic_and_lymphoid_tissue	lymphoid_neoplasm	acute_lymphoblastic_B_cell_leukaemia	0	0.0754523
HUT102_HAEMATOPOIETIC_AND_LYMPHOID_TISSUE	HuT 102	M	haematopoietic_and_lymphoid_tissue	lymphoid_neoplasm	mycosis_fungoides-Sezary_syndrome	9.96021	0.0745223
JHOM1_OVARY	JHOM-1	unknown	ovary	carcinoma	adenocarcinoma	1.27868	0.0740637
IM95_STOMACH	IM95	M	stomach	carcinoma	intestinal_adenocarcinoma	0.565527	0.0729835
CALU1_LUNG	Calu-1	M	lung	carcinoma	squamous_cell_carcinoma	17.7657	0.0725181
						5.42991	0.072247
OVCAR4_OVARY	OVCAR-4	F	ovary	carcinoma	NS	1.59826	0.0718483
SNU308_BILIARY_TRACT	SNU-308	unknown	biliary_tract	carcinoma	NS	1.10704	0.0715197
RI1_HAEMATOPOIETIC_AND_LYMPHOID_TISSUE	RI-1	F	haematopoietic_and_lymphoid_tissue	lymphoid_neoplasm	B_cell_lymphoma_unspecified	0.609345	0.0701172
TCCPAN2_PANCREAS	TCC-PAN2	F	pancreas	carcinoma	NS	0	0.0698344
BT474_BREAST	BT-474	F	breast	carcinoma	ductal_carcinoma	0.00716039	0.0692633
JL1_PLEURA	JL-1	M	pleura	mesothelioma	NS	1.24281	0.0691328
KMH2_HAEMATOPOIETIC_AND_LYMPHOID_TISSUE	KM-H2	M	haematopoietic_and_lymphoid_tissue	lymphoid_neoplasm	Hodgkin_lymphoma	3.73555	0.0678567
GRANTA519_HAEMATOPOIETIC_AND_LYMPHOID_TISSUE	GRANTA-519	F	haematopoietic_and_lymphoid_tissue	lymphoid_neoplasm	mantle_cell_lymphoma	14.2931	0.0675346
HCC56_LARGE_INTESTINE	HCC-56	unknown	large_intestine	carcinoma	adenocarcinoma	0.184733	0.0672529
KMRC2_KIDNEY	KMRC-2	M	kidney	carcinoma	clear_cell_renal_cell_carcinoma	5.29806	0.0670707
GA10_HAEMATOPOIETIC_AND_LYMPHOID_TISSUE	GA-10	M	haematopoietic_and_lymphoid_tissue	lymphoid_neoplasm	Burkitt_lymphoma	0.0507813	0.0670302
SKLMS1_SOFT_TISSUE	SK-LMS-1	F	soft_tissue	sarcoma	NS	2.93089	0.0661022
NCIH2087_LUNG	NCI-H2087	M	lung	carcinoma	adenocarcinoma	8.60581	0.0660615
						4.80859	0.0653425
253J_URINARY_TRACT	253J	unknown	urinary_tract	carcinoma	transitional_cell_carcinoma	0.105086	0.0651187
BFTC905_URINARY_TRACT	BFTC-905	F	urinary_tract	carcinoma	transitional_cell_carcinoma	1.59224	0.0648789
SUPB15_HAEMATOPOIETIC_AND_LYMPHOID_TISSUE	SUP-B15	M	haematopoietic_and_lymphoid_tissue	lymphoid_neoplasm	acute_lymphoblastic_B_cell_leukaemia	0.413273	0.0648745
NCIH2081_LUNG	NCI-H2081	F	lung	carcinoma	small_cell_carcinoma	1.52396	0.0646347
NCIH3255_LUNG	NCI-H3255	F	lung	carcinoma	adenocarcinoma	8.86462	0.0643902
CORL24_LUNG	COR-L24	M	lung	carcinoma	small_cell_carcinoma	0.0198731	0.0640057
SNU423_LIVER	SNU-423	M	liver	carcinoma	hepatocellular_carcinoma	18.3181	0.0631521
HEP3B217_LIVER	Hep 3B2.1-7	M	liver	carcinoma	hepatocellular_carcinoma	4.86788e-08	0.0627482
BICR56_UPPER_AERODIGESTIVE_TRACT	BICR 56	F	upper_aerodigestive_tract	carcinoma	squamous_cell_carcinoma	2.21591	0.0614948
KOPN8_HAEMATOPOIETIC_AND_LYMPHOID_TISSUE	KOPN-8	F	haematopoietic_and_lymphoid_tissue	lymphoid_neoplasm	acute_lymphoblastic_B_cell_leukaemia	0.100374	0.0614102
A673_BONE	A-673	F	bone	Ewings_sarcoma-peripheral_primitive_neuroectodermal_tumour	NS	0.00799332	0.0612569
TE11_OESOPHAGUS	TE-11	unknown	oesophagus	carcinoma	squamous_cell_carcinoma	2.42561	0.0600064
KNS62_LUNG	KNS-62	M	lung	carcinoma	squamous_cell_carcinoma	0.256223	0.0599864
COLO783_SKIN	COLO-783	F	skin	malignant_melanoma	NS	0.32913	0.0599469
TALL1_HAEMATOPOIETIC_AND_LYMPHOID_TISSUE	TALL-1	M	haematopoietic_and_lymphoid_tissue	lymphoid_neoplasm	acute_lymphoblastic_T_cell_leukaemia	2.18431e-08	0.0596437
SNU626_CENTRAL_NERVOUS_SYSTEM	SNU-626	M	central_nervous_system	glioma	astrocytoma_Grade_IV	3.34159	0.0593385
MCAS_OVARY	MCAS	F	ovary	carcinoma	adenocarcinoma	7.83793	0.0593174
KMS27_HAEMATOPOIETIC_AND_LYMPHOID_TISSUE	KMS-27	M	haematopoietic_and_lymphoid_tissue	lymphoid_neoplasm	plasma_cell_myeloma	0.103042	0.0590457
NCIH1618_LUNG	NCI-H1618	F	lung	carcinoma	small_cell_carcinoma	0.295911	0.0589224
AMO1_HAEMATOPOIETIC_AND_LYMPHOID_TISSUE	AMO-1	F	haematopoietic_and_lymphoid_tissue	lymphoid_neoplasm	plasma_cell_myeloma	0.0600132	0.0586883
LCLC97TM1_LUNG	LCLC-97TM1	M	lung	carcinoma	large_cell_carcinoma	17.9068	0.0584753
CAL51_BREAST	CAL-51	F	breast	carcinoma	NS	0.000356602	0.058056
CAL54_KIDNEY	CAL-54	M	kidney	carcinoma	renal_cell_carcinoma	0.0744352	0.0577757
NCIH727_LUNG	NCI-H727	F	lung	carcinoid-endocrine_tumour	NS	0.243784	0.0569932
SNU398_LIVER	SNU-398	M	liver	carcinoma	hepatocellular_carcinoma	0.0266379	0.0563704
22RV1_PROSTATE	22Rv1	M	prostate	carcinoma	NS	0.109297	0.0563196
WM793_SKIN	WM-793	unknown	skin	malignant_melanoma	NS	4.05137	0.0556634
L363_HAEMATOPOIETIC_AND_LYMPHOID_TISSUE	L-363	F	haematopoietic_and_lymphoid_tissue	lymphoid_neoplasm	plasma_cell_myeloma	0.644007	0.0554171
NCIH526_LUNG	NCI-H526	M	lung	carcinoma	small_cell_carcinoma	0.0422243	0.0554134
GOS3_CENTRAL_NERVOUS_SYSTEM	GOS-3	M	central_nervous_system	glioma	astrocytoma	1.65057	0.0552587
EM2_HAEMATOPOIETIC_AND_LYMPHOID_TISSUE	EM-2	F	haematopoietic_and_lymphoid_tissue	haematopoietic_neoplasm	blast_phase_chronic_myeloid_leukaemia	0.0723926	0.0547175
A498_KIDNEY	A-498	F	kidney	carcinoma	renal_cell_carcinoma	0.845291	0.054069
A2780_OVARY	A2780	F	ovary	carcinoma	adenocarcinoma	0.386849	0.0540635
OCILY3_HAEMATOPOIETIC_AND_LYMPHOID_TISSUE	OCI-LY3	unknown	haematopoietic_and_lymphoid_tissue	lymphoid_neoplasm	diffuse_large_B_cell_lymphoma	1.78203	0.053226
SNU503_LARGE_INTESTINE	SNU-503	M	large_intestine	carcinoma	NS	8.2837	0.0528876
HCC1395_BREAST	HCC1395	F	breast	carcinoma	ductal_carcinoma	0.342436	0.0527851
CHAGOK1_LUNG	ChaGo-K-1	M	lung	carcinoma	NS	0.115822	0.0516024
NCIH2444_LUNG	NCI-H2444	M	lung	carcinoma	non_small_cell_carcinoma	32.4146	0.0511215
TOV112D_OVARY	TOV-112D	F	ovary	carcinoma	endometrioid_carcinoma	0	0.0507728
MV411_HAEMATOPOIETIC_AND_LYMPHOID_TISSUE	MV-4-11	M	haematopoietic_and_lymphoid_tissue	haematopoietic_neoplasm	acute_myeloid_leukaemia	0.0171548	0.0494631
MDAMB157_BREAST	MDA-MB-157	F	breast	carcinoma	ductal_carcinoma	0.147643	0.0494337
SNU478_BILIARY_TRACT	SNU-478	unknown	biliary_tract	carcinoma	NS	0.947891	0.0491745
G402_SOFT_TISSUE	G-402	F	soft_tissue	rhabdoid_tumour	NS	0	0.0490414
BL41_HAEMATOPOIETIC_AND_LYMPHOID_TISSUE	BL-41	M	haematopoietic_and_lymphoid_tissue	lymphoid_neoplasm	Burkitt_lymphoma	0.0325751	0.0482707
NCIH2023_LUNG	NCI-H2023	M	lung	carcinoma	adenocarcinoma	0.463386	0.0479377
JHOC5_OVARY	JHOC-5	unknown	ovary	carcinoma	clear_cell_carcinoma	0.81274	0.047254
FUOV1_OVARY	FU-OV-1	F	ovary	carcinoma	serous_carcinoma	0.158508	0.0457652
OE19_OESOPHAGUS	OE19	M	oesophagus	carcinoma	adenocarcinoma	0.0196385	0.043945
NCIH522_LUNG	NCI-H522	M	lung	carcinoma	non_small_cell_carcinoma	0	0.0439276
OCILY19_HAEMATOPOIETIC_AND_LYMPHOID_TISSUE	OCI-LY-19	F	haematopoietic_and_lymphoid_tissue	lymphoid_neoplasm	diffuse_large_B_cell_lymphoma	0.243382	0.0437909
COLO792_SKIN	COLO 792	M	skin	malignant_melanoma	NS	0.310457	0.0434981
RL952_ENDOMETRIUM	RL95-2	F	endometrium	carcinoma	mixed_adenosquamous_carcinoma	0.461414	0.0429169
SNU761_LIVER	SNU-761	M	liver	carcinoma	hepatocellular_carcinoma	0.500343	0.042343
KASUMI2_HAEMATOPOIETIC_AND_LYMPHOID_TISSUE	KASUMI-2	M	haematopoietic_and_lymphoid_tissue	lymphoid_neoplasm	acute_lymphoblastic_B_cell_leukaemia	0.260881	0.0423006
T84_LARGE_INTESTINE	T84	M	large_intestine	carcinoma	adenocarcinoma	0.330536	0.042232
NUDUL1_HAEMATOPOIETIC_AND_LYMPHOID_TISSUE	NU-DUL-1	M	haematopoietic_and_lymphoid_tissue	lymphoid_neoplasm	B_cell_lymphoma_unspecified	0.135681	0.0415539
PEER_HAEMATOPOIETIC_AND_LYMPHOID_TISSUE	PEER	F	haematopoietic_and_lymphoid_tissue	lymphoid_neoplasm	acute_lymphoblastic_T_cell_leukaemia	0.312993	0.0414409
OCIAML5_HAEMATOPOIETIC_AND_LYMPHOID_TISSUE	OCI-AML5	M	haematopoietic_and_lymphoid_tissue	haematopoietic_neoplasm	acute_myeloid_leukaemia	0.0474487	0.0409112
SW1783_CENTRAL_NERVOUS_SYSTEM	SW 1783	M	central_nervous_system	glioma	astrocytoma_Grade_III	2.05842	0.0403947
SUPT11_HAEMATOPOIETIC_AND_LYMPHOID_TISSUE	SUP-T11	M	haematopoietic_and_lymphoid_tissue	lymphoid_neoplasm	peripheral_T_cell_lymphoma_unspecified	0.250447	0.0400978
KYSE180_OESOPHAGUS	KYSE-180	M	oesophagus	carcinoma	squamous_cell_carcinoma	0.623479	0.04007
SKMEL24_SKIN	SK-MEL-24	M	skin	malignant_melanoma	NS	0.372972	0.0400587
HUPT4_PANCREAS	HUP-T4	M	pancreas	carcinoma	NS	4.13274	0.0388429
BL70_HAEMATOPOIETIC_AND_LYMPHOID_TISSUE	BL-70	M	haematopoietic_and_lymphoid_tissue	lymphoid_neoplasm	Burkitt_lymphoma	0.0725306	0.0383207
HEC59_ENDOMETRIUM	HEC-59	F	endometrium	carcinoma	adenocarcinoma	0.0964097	0.0379828
REC1_HAEMATOPOIETIC_AND_LYMPHOID_TISSUE	REC-1	M	haematopoietic_and_lymphoid_tissue	lymphoid_neoplasm	mantle_cell_lymphoma	0.456952	0.037289
NCIH1734_LUNG	NCI-H1734	F	lung	carcinoma	adenocarcinoma	10.0993	0.0371167
MDAMB175VII_BREAST	MDA-MB-175-VII	F	breast	carcinoma	ductal_carcinoma	0.0342558	0.0367278
RS411_HAEMATOPOIETIC_AND_LYMPHOID_TISSUE	RS4;11	F	haematopoietic_and_lymphoid_tissue	lymphoid_neoplasm	acute_lymphoblastic_B_cell_leukaemia	0.0642418	0.035781
NUDHL1_HAEMATOPOIETIC_AND_LYMPHOID_TISSUE	NU-DHL-1	M	haematopoietic_and_lymphoid_tissue	lymphoid_neoplasm	diffuse_large_B_cell_lymphoma	0.0555053	0.0353198
NUGC2_STOMACH	NUGC-2	F	stomach	carcinoma	adenocarcinoma	0.813482	0.0342108
NCIH146_LUNG	NCI-H146	M	lung	carcinoma	small_cell_carcinoma	0.0355428	0.0341064
NCIH1666_LUNG	NCI-H1666	F	lung	carcinoma	bronchioloalveolar_adenocarcinoma	0.84164	0.0338496
MDAMB453_BREAST	MDA-MB-453	F	breast	carcinoma	NS	0.0333678	0.0319904
A204_SOFT_TISSUE	A-204	F	soft_tissue	rhabdoid_tumour	NS	0.462069	0.0319293
NCIH1703_LUNG	NCI-H1703	M	lung	carcinoma	adenocarcinoma	0.17004	0.0318882
EFO27_OVARY	EFO-27	F	ovary	carcinoma	mucinous_carcinoma	0.758141	0.0308114
SKM1_HAEMATOPOIETIC_AND_LYMPHOID_TISSUE	SKM-1	M	haematopoietic_and_lymphoid_tissue	haematopoietic_neoplasm	acute_myeloid_leukaemia	0.0282966	0.0301651
SNGM_ENDOMETRIUM	SNG-M	F	endometrium	carcinoma	adenocarcinoma	0.0628415	0.0299854
ECC10_STOMACH	ECC10	unknown	stomach	carcinoma	small_cell_adenocarcinoma	1.05131	0.0296714
MOLT16_HAEMATOPOIETIC_AND_LYMPHOID_TISSUE	MOLT-16	F	haematopoietic_and_lymphoid_tissue	lymphoid_neoplasm	acute_lymphoblastic_T_cell_leukaemia	0.342636	0.0293389
KP4_PANCREAS	KP4	M	pancreas	carcinoma	ductal_carcinoma	0.182039	0.0290802
OV56_OVARY	OV56	F	ovary	carcinoma	NS	1.09175	0.0279679
BICR16_UPPER_AERODIGESTIVE_TRACT	BICR 16	M	upper_aerodigestive_tract	carcinoma	squamous_cell_carcinoma	0.781934	0.0267408
HCC2157_BREAST	HCC2157	F	breast	carcinoma	ductal_carcinoma	0	0.0260245
NCIH1581_LUNG	NCI-H1581	M	lung	carcinoma	large_cell_carcinoma	0.0605823	0.0259617
NAMALWA_HAEMATOPOIETIC_AND_LYMPHOID_TISSUE	NAMALWA	F	haematopoietic_and_lymphoid_tissue	lymphoid_neoplasm	Burkitt_lymphoma	0.0469499	0.0247302
RD_SOFT_TISSUE	RD	F	soft_tissue	rhabdomyosarcoma	embryonal	0.522431	0.0240544
CORL95_LUNG	COR-L95	M	lung	carcinoma	small_cell_carcinoma	1.19287	0.0237985
COLO829_SKIN	COLO 829	M	skin	malignant_melanoma	NS	0.28774	0.0237589
NCIH23_LUNG	NCI-H23	M	lung	carcinoma	non_small_cell_carcinoma	0.151426	0.0234089
COLO201_LARGE_INTESTINE	COLO 201	M	large_intestine	carcinoma	adenocarcinoma	2.61461	0.0233208
NCIH1155_LUNG	NCI-H1155	M	lung	carcinoma	large_cell_carcinoma	1.17372	0.0221303
NCIH1048_LUNG	NCI-H1048	F	lung	carcinoma	small_cell_carcinoma	0.636718	0.021749
HCC202_BREAST	HCC202	F	breast	carcinoma	ductal_carcinoma	0.219959	0.021556
LU99_LUNG	LU99	M	lung	carcinoma	large_cell_carcinoma	4.13631	0.0214469
ME1_HAEMATOPOIETIC_AND_LYMPHOID_TISSUE	ME-1	M	haematopoietic_and_lymphoid_tissue	haematopoietic_neoplasm	acute_myeloid_leukaemia	0.24516	0.0213491
DB_HAEMATOPOIETIC_AND_LYMPHOID_TISSUE	DB	M	haematopoietic_and_lymphoid_tissue	lymphoid_neoplasm	diffuse_large_B_cell_lymphoma	0.0357638	0.0212931
HEPG2_LIVER	Hep G2	M	liver	carcinoma	hepatocellular_carcinoma	0.0177542	0.0204566
HS737T_BONE	Hs 737.T	F	bone	other	giant_cell_tumour	0.410201	0.0183284
HUH6_LIVER	HuH-6	unknown	liver	other	hepatoblastoma	0.0261779	0.0183247
SNU175_LARGE_INTESTINE	SNU-175	F	large_intestine	carcinoma	NS	0.480867	0.0175065
SKMEL31_SKIN	SK-MEL-31	F	skin	malignant_melanoma	NS	0.736799	0.0164676
HEC1A_ENDOMETRIUM	HEC-1-A	F	endometrium	carcinoma	adenocarcinoma	0.171599	0.0158313
DU4475_BREAST	DU4475	F	breast	carcinoma	ductal_carcinoma	0.835935	0.0151409
HCC1588_LUNG	HCC-1588	F	lung	carcinoma	squamous_cell_carcinoma	0.0760945	0.0150759
RS5_PLEURA	RS-5	M	pleura	mesothelioma	NS	5.72679	0.0143843
MCF7_BREAST	MCF7	F	breast	carcinoma	NS	0.0726092	0.0140573
NCIH2342_LUNG	NCI-H2342	M	lung	carcinoma	adenocarcinoma	0.820284	0.0135438
KMRC20_KIDNEY	KMRC-20	unknown	kidney	carcinoma	renal_cell_carcinoma	1.38527	0.0125956
HL60_HAEMATOPOIETIC_AND_LYMPHOID_TISSUE	HL-60	F	haematopoietic_and_lymphoid_tissue	haematopoietic_neoplasm	acute_myeloid_leukaemia	0	0.0114264
BICR22_UPPER_AERODIGESTIVE_TRACT	BICR 22	M	upper_aerodigestive_tract	carcinoma	squamous_cell_carcinoma	0.935747	0.011322
HH_HAEMATOPOIETIC_AND_LYMPHOID_TISSUE	HH	M	haematopoietic_and_lymphoid_tissue	lymphoid_neoplasm	adult_T_cell_lymphoma-leukaemia	0	0.0112951
SW948_LARGE_INTESTINE	SW948	F	large_intestine	carcinoma	adenocarcinoma	0.047075	0.00956149
MC116_HAEMATOPOIETIC_AND_LYMPHOID_TISSUE	MC116	M	haematopoietic_and_lymphoid_tissue	lymphoid_neoplasm	B_cell_lymphoma_unspecified	2.4077	0.00877208
NCIH841_LUNG	NCI-H841	M	lung	carcinoma	small_cell_carcinoma	0.0368423	0.00774123
MOLT13_HAEMATOPOIETIC_AND_LYMPHOID_TISSUE	MOLT-13	F	haematopoietic_and_lymphoid_tissue	lymphoid_neoplasm	acute_lymphoblastic_T_cell_leukaemia	0.0607322	0.00663195
LC1F_LUNG	LC-1F	M	lung	carcinoma	squamous_cell_carcinoma	1.23933	0.00472683
LP1_HAEMATOPOIETIC_AND_LYMPHOID_TISSUE	LP-1	F	haematopoietic_and_lymphoid_tissue	lymphoid_neoplasm	plasma_cell_myeloma	0.234532	0.00446911
KYSE30_OESOPHAGUS	KYSE-30	M	oesophagus	carcinoma	squamous_cell_carcinoma	1.52088	0.00424436
HCC1806_BREAST	HCC1806	F	breast	carcinoma	ductal_carcinoma	0.4299	0.00402194
NCIH1341_LUNG	NCI-H1341	F	lung	carcinoma	small_cell_carcinoma	0.0328537	0.00351248
NCIH1092_LUNG	NCI-H1092	M	lung	carcinoma	small_cell_carcinoma	0.359555	0.00346817
KYSE410_OESOPHAGUS	KYSE-410	M	oesophagus	carcinoma	squamous_cell_carcinoma	2.30044	0.00344063
HEL_HAEMATOPOIETIC_AND_LYMPHOID_TISSUE	HEL	M	haematopoietic_and_lymphoid_tissue	haematopoietic_neoplasm	acute_myeloid_leukaemia	3.8879	0.00309157
HUG1N_STOMACH	HuG1-N	M	stomach	carcinoma	NS	0.143828	0.00307467
SNU5_STOMACH	SNU-5	F	stomach	carcinoma	undifferentiated_adenocarcinoma	0.114515	0.00246492
MHHES1_BONE	MHH-ES-1	M	bone	Ewings_sarcoma-peripheral_primitive_neuroectodermal_tumour	NS	0.350385	0.00230108
MJ_HAEMATOPOIETIC_AND_LYMPHOID_TISSUE	MJ	M	haematopoietic_and_lymphoid_tissue	lymphoid_neoplasm	mycosis_fungoides-Sezary_syndrome	1.24026	0.00203925
RH30_SOFT_TISSUE	RH-30	M	soft_tissue	rhabdomyosarcoma	alveolar	3.28388	0.0019843
CA46_HAEMATOPOIETIC_AND_LYMPHOID_TISSUE	CA46	M	haematopoietic_and_lymphoid_tissue	lymphoid_neoplasm	Burkitt_lymphoma	0.144714	0.00188381
MHHCALL4_HAEMATOPOIETIC_AND_LYMPHOID_TISSUE	MHH-CALL-4	M	haematopoietic_and_lymphoid_tissue	lymphoid_neoplasm	acute_lymphoblastic_B_cell_leukaemia	0.313259	0.00119767
ZR751_BREAST	ZR-75-1	F	breast	carcinoma	ductal_carcinoma	0.00930735	0.00103325
SET2_HAEMATOPOIETIC_AND_LYMPHOID_TISSUE	Set-2	F	haematopoietic_and_lymphoid_tissue	haematopoietic_neoplasm	essential_thrombocythaemia	3.7075	0.000278088
KPNSI9S_AUTONOMIC_GANGLIA	KP-N-SI9s	M	autonomic_ganglia	neuroblastoma	NS	6.71542	0.000244521
SUDHL6_HAEMATOPOIETIC_AND_LYMPHOID_TISSUE	SU-DHL-6	M	haematopoietic_and_lymphoid_tissue	lymphoid_neoplasm	diffuse_large_B_cell_lymphoma	0.145509	0.000150191
NCIH1648_LUNG	NCI-H1648	M	lung	carcinoma	adenocarcinoma	0.969283	9.0779e-05
NCIH1568_LUNG	NCI-H1568	F	lung	carcinoma	non_small_cell_carcinoma	2.20843	6.8297e-05
AML193_HAEMATOPOIETIC_AND_LYMPHOID_TISSUE	AML-193	F	haematopoietic_and_lymphoid_tissue	haematopoietic_neoplasm	acute_myeloid_leukaemia	0.35243	1.43874e-05
VMCUB1_URINARY_TRACT	VM-CUB1	M	urinary_tract	carcinoma	transitional_cell_carcinoma	5.19279	3.11256e-06
RCC10RGB_KIDNEY	RCC10RGB	unknown	kidney	carcinoma	renal_cell_carcinoma	2.63284	9.1332e-09
COLO320_LARGE_INTESTINE	COLO-320	F	large_intestine	carcinoma	adenocarcinoma	0	0
SKES1_BONE	SK-ES-1	M	bone	Ewings_sarcoma-peripheral_primitive_neuroectodermal_tumour	NS	0	0
KPL1_BREAST	KPL-1	F	breast	carcinoma	ductal_carcinoma	0	0
KELLY_AUTONOMIC_GANGLIA	KELLY	unknown	autonomic_ganglia	neuroblastoma	NS	0	0
KMS21BM_HAEMATOPOIETIC_AND_LYMPHOID_TISSUE	KMS-21BM	M	haematopoietic_and_lymphoid_tissue	lymphoid_neoplasm	plasma_cell_myeloma	0	0
NCIH2106_LUNG	NCI-H2106	M	lung	carcinoma	non_small_cell_carcinoma	0	0
HEC1B_ENDOMETRIUM	HEC-1-B	F	endometrium	carcinoma	adenocarcinoma	0	0
IMR32_AUTONOMIC_GANGLIA	IMR-32	M	autonomic_ganglia	neuroblastoma	NS	0	0
TE10_OESOPHAGUS	TE-10	unknown	oesophagus	carcinoma	squamous_cell_carcinoma	0	0
RL_HAEMATOPOIETIC_AND_LYMPHOID_TISSUE	RL	M	haematopoietic_and_lymphoid_tissue	lymphoid_neoplasm	B_cell_lymphoma_unspecified	0	0
HCC2218_BREAST	HCC2218	F	breast	carcinoma	ductal_carcinoma	0	0
U937_HAEMATOPOIETIC_AND_LYMPHOID_TISSUE	U-937	M	haematopoietic_and_lymphoid_tissue	lymphoid_neoplasm	diffuse_large_B_cell_lymphoma	0	0
G401_SOFT_TISSUE	G-401	M	soft_tissue	rhabdoid_tumour	NS	0	0
NCIH69_LUNG	NCI-H69	M	lung	carcinoma	small_cell_carcinoma	0	0
NOMO1_HAEMATOPOIETIC_AND_LYMPHOID_TISSUE	NOMO-1	F	haematopoietic_and_lymphoid_tissue	haematopoietic_neoplasm	acute_myeloid_leukaemia	0	0
SKHEP1_LIVER	SK-HEP-1	M	liver	carcinoma	adenocarcinoma	0.489555	0
RKN_SOFT_TISSUE	RKN	F	soft_tissue	leiomyosarcoma	NS	8.08097	0
ZR7530_BREAST	ZR-75-30	F	breast	carcinoma	ductal_carcinoma	0.0515024	0
OVMANA_OVARY	OVMANA	F	ovary	carcinoma	clear_cell_carcinoma	0.0397747	0
TC71_BONE	TC-71	M	bone	Ewings_sarcoma-peripheral_primitive_neuroectodermal_tumour	NS	0.0537771	0
SBC5_LUNG	SBC-5	unknown	lung	carcinoma	small_cell_carcinoma	0.0713983	0
ALLSIL_HAEMATOPOIETIC_AND_LYMPHOID_TISSUE	ALL-SIL	M	haematopoietic_and_lymphoid_tissue	lymphoid_neoplasm	acute_lymphoblastic_T_cell_leukaemia	0.343025	0
A3KAW_HAEMATOPOIETIC_AND_LYMPHOID_TISSUE	A3/KAW	F	haematopoietic_and_lymphoid_tissue	lymphoid_neoplasm	diffuse_large_B_cell_lymphoma	0.0892986	0
D341MED_CENTRAL_NERVOUS_SYSTEM	D341 Med	M	central_nervous_system	primitive_neuroectodermal_tumour-medulloblastoma	NS	0.0147946	0
HCC1359_LUNG	HCC-1359	F	lung	carcinoma	large_cell_carcinoma	8.26397	0
CHP126_AUTONOMIC_GANGLIA	CHP-126	F	autonomic_ganglia	neuroblastoma	NS	0.0354697	0
HCC1428_BREAST	HCC1428	F	breast	carcinoma	NS	0.615521	0
BCPAP_THYROID	B-CPAP	F	thyroid	carcinoma	papillary_carcinoma	18.5608	0
HCC1500_BREAST	HCC1500	F	breast	carcinoma	ductal_carcinoma	0.169492	0
CALU3_LUNG	Calu-3	M	lung	carcinoma	adenocarcinoma	0.360507	0
EN_ENDOMETRIUM	EN	F	endometrium	carcinoma	NS	0.0404107	0
EBC1_LUNG	EBC-1	M	lung	carcinoma	squamous_cell_carcinoma	8.55623	0
CAPAN2_PANCREAS	Capan-2	M	pancreas	carcinoma	ductal_carcinoma	3.549	0
CAMA1_BREAST	CAMA-1	F	breast	carcinoma	NS	0.136347	0
CMLT1_HAEMATOPOIETIC_AND_LYMPHOID_TISSUE	CML-T1	F	haematopoietic_and_lymphoid_tissue	haematopoietic_neoplasm	blast_phase_chronic_myeloid_leukaemia	0.166952	0
BV173_HAEMATOPOIETIC_AND_LYMPHOID_TISSUE	BV-173	M	haematopoietic_and_lymphoid_tissue	haematopoietic_neoplasm	blast_phase_chronic_myeloid_leukaemia	1.27814	0
CJM_SKIN	CJM	unknown	skin	malignant_melanoma	NS	13.7104	0
ECGI10_OESOPHAGUS	EC-GI-10	unknown	oesophagus	carcinoma	NS	3.7108	0
DAUDI_HAEMATOPOIETIC_AND_LYMPHOID_TISSUE	Daudi	M	haematopoietic_and_lymphoid_tissue	lymphoid_neoplasm	Burkitt_lymphoma	0.161522	0
D283MED_CENTRAL_NERVOUS_SYSTEM	D283 Med	M	central_nervous_system	primitive_neuroectodermal_tumour-medulloblastoma	NS	0.0496638	0
BCP1_HAEMATOPOIETIC_AND_LYMPHOID_TISSUE	BCP-1	M	haematopoietic_and_lymphoid_tissue	lymphoid_neoplasm	B_cell_lymphoma_unspecified	0.0482654	0
HCC1599_BREAST	HCC1599	F	breast	carcinoma	ductal_carcinoma	0.0578588	0
CADOES1_BONE	CADO-ES1	F	bone	Ewings_sarcoma-peripheral_primitive_neuroectodermal_tumour	NS	0.00879505	0
CL34_LARGE_INTESTINE	CL-34	F	large_intestine	carcinoma	adenocarcinoma	0.380025	0
CAL148_BREAST	CAL-148	F	breast	carcinoma	ductal_carcinoma	0.0525772	0
BHT101_THYROID	BHT-101	F	thyroid	carcinoma	anaplastic_carcinoma	1.56609	0
HCC1569_BREAST	HCC1569	F	breast	carcinoma	metaplastic_carcinoma	0.164126	0
CI1_HAEMATOPOIETIC_AND_LYMPHOID_TISSUE	CI-1	F	haematopoietic_and_lymphoid_tissue	lymphoid_neoplasm	B_cell_lymphoma_unspecified	1.85682	0
DOHH2_HAEMATOPOIETIC_AND_LYMPHOID_TISSUE	DOHH-2	M	haematopoietic_and_lymphoid_tissue	lymphoid_neoplasm	diffuse_large_B_cell_lymphoma	0.0691426	0
EOL1_HAEMATOPOIETIC_AND_LYMPHOID_TISSUE	EOL-1	M	haematopoietic_and_lymphoid_tissue	haematopoietic_neoplasm	acute_myeloid_leukaemia	0.24115	0
CAL33_UPPER_AERODIGESTIVE_TRACT	CAL-33	M	upper_aerodigestive_tract	carcinoma	squamous_cell_carcinoma	3.53545	0
GDM1_HAEMATOPOIETIC_AND_LYMPHOID_TISSUE	GDM-1	F	haematopoietic_and_lymphoid_tissue	haematopoietic_neoplasm	acute_myeloid_leukaemia	0.306571	0
CMK_HAEMATOPOIETIC_AND_LYMPHOID_TISSUE	CMK	unknown	haematopoietic_and_lymphoid_tissue	haematopoietic_neoplasm	acute_myeloid_leukaemia	0.111442	0
HCC1195_LUNG	HCC-1195	M	lung	carcinoma	mixed_adenosquamous_carcinoma	9.81404	0
ECC12_STOMACH	ECC12	unknown	stomach	carcinoma	small_cell_adenocarcinoma	0.346059	0
SKLU1_LUNG	SK-LU-1	F	lung	carcinoma	adenocarcinoma	0.247525	0
SKNAS_AUTONOMIC_GANGLIA	SK-N-AS	F	autonomic_ganglia	neuroblastoma	NS	6.10557	0
SIGM5_HAEMATOPOIETIC_AND_LYMPHOID_TISSUE	SIG-M5	M	haematopoietic_and_lymphoid_tissue	haematopoietic_neoplasm	acute_myeloid_leukaemia	0.0337331	0
SKNDZ_AUTONOMIC_GANGLIA	SK-N-DZ	F	autonomic_ganglia	neuroblastoma	NS	5.35121e-08	0
SNU520_STOMACH	SNU-520	F	stomach	carcinoma	NS	0.0639604	0
SNU1196_BILIARY_TRACT	SNU-1196	unknown	biliary_tract	carcinoma	NS	3.37532	0
PFEIFFER_HAEMATOPOIETIC_AND_LYMPHOID_TISSUE	Pfeiffer	M	haematopoietic_and_lymphoid_tissue	lymphoid_neoplasm	diffuse_large_B_cell_lymphoma	0.0189032	0
RPMI8402_HAEMATOPOIETIC_AND_LYMPHOID_TISSUE	RPMI-8402	F	haematopoietic_and_lymphoid_tissue	lymphoid_neoplasm	acute_lymphoblastic_T_cell_leukaemia	0.335602	0
RH41_SOFT_TISSUE	RH-41	F	soft_tissue	rhabdomyosarcoma	alveolar	0.177413	0
SIMA_AUTONOMIC_GANGLIA	SIMA	M	autonomic_ganglia	neuroblastoma	NS	0.0517658	0
PF382_HAEMATOPOIETIC_AND_LYMPHOID_TISSUE	PF-382	F	haematopoietic_and_lymphoid_tissue	lymphoid_neoplasm	acute_lymphoblastic_T_cell_leukaemia	0.290115	0
SNU620_STOMACH	SNU-620	F	stomach	carcinoma	NS	0.458728	0
RERFLCSQ1_LUNG	RERF-LC-Sq1	F	lung	carcinoma	squamous_cell_carcinoma	12.9302	0
SNU216_STOMACH	SNU-216	F	stomach	carcinoma	NS	2.72435	0
SNU410_PANCREAS	SNU-410	M	pancreas	carcinoma	NS	3.25809	0
SKNBE2_AUTONOMIC_GANGLIA	SK-N-BE(2)	M	autonomic_ganglia	neuroblastoma	NS	0.0469569	0
SNU1040_LARGE_INTESTINE	SNU-1040	M	large_intestine	carcinoma	NS	0.407098	0
SNU1214_UPPER_AERODIGESTIVE_TRACT	SNU-1214	M	upper_aerodigestive_tract	carcinoma	squamous_cell_carcinoma	1.15413	0
SAOS2_BONE	Saos-2	F	bone	osteosarcoma	NS	9.92272	0
PECAPJ41CLONED2_UPPER_AERODIGESTIVE_TRACT	PE/CA-PJ41 (clone D2)	F	upper_aerodigestive_tract	carcinoma	squamous_cell_carcinoma	1.8601	0
SCC9_UPPER_AERODIGESTIVE_TRACT	SCC-9	M	upper_aerodigestive_tract	carcinoma	squamous_cell_carcinoma	0.798537	0
SNU1076_UPPER_AERODIGESTIVE_TRACT	SNU-1076	M	upper_aerodigestive_tract	carcinoma	squamous_cell_carcinoma	3.35405	0
SKNMC_BONE	SK-N-MC	F	bone	Ewings_sarcoma-peripheral_primitive_neuroectodermal_tumour	NS	0.0145369	0
RDES_BONE	RD-ES	M	bone	Ewings_sarcoma-peripheral_primitive_neuroectodermal_tumour	NS	0.0196848	0
PL21_HAEMATOPOIETIC_AND_LYMPHOID_TISSUE	PL-21	M	haematopoietic_and_lymphoid_tissue	haematopoietic_neoplasm	acute_myeloid_leukaemia	0.0639197	0
SNU119_OVARY	SNU-119	F	ovary	carcinoma	adenocarcinoma	1.1755	0
JK1_HAEMATOPOIETIC_AND_LYMPHOID_TISSUE	JK-1	M	haematopoietic_and_lymphoid_tissue	haematopoietic_neoplasm	blast_phase_chronic_myeloid_leukaemia	0.547404	0
M059K_CENTRAL_NERVOUS_SYSTEM	M059K	M	central_nervous_system	glioma	astrocytoma_Grade_IV	22.1468	0
MFE319_ENDOMETRIUM	MFE-319	F	endometrium	carcinoma	adenocarcinoma	0.101482	0
KPNRTBM1_AUTONOMIC_GANGLIA	KP-N-RT-BM-1	unknown	autonomic_ganglia	neuroblastoma	NS	0.0884298	0
KPNYN_AUTONOMIC_GANGLIA	KP-N-YN	unknown	autonomic_ganglia	neuroblastoma	NS	0.0776208	0
M07E_HAEMATOPOIETIC_AND_LYMPHOID_TISSUE	M-07e	F	haematopoietic_and_lymphoid_tissue	haematopoietic_neoplasm	acute_myeloid_leukaemia	0.387519	0
KE37_HAEMATOPOIETIC_AND_LYMPHOID_TISSUE	KE-37	M	haematopoietic_and_lymphoid_tissue	lymphoid_neoplasm	acute_lymphoblastic_T_cell_leukaemia	0.0876916	0
JURLMK1_HAEMATOPOIETIC_AND_LYMPHOID_TISSUE	JURL-MK1	M	haematopoietic_and_lymphoid_tissue	haematopoietic_neoplasm	blast_phase_chronic_myeloid_leukaemia	0.161976	0
KLE_ENDOMETRIUM	KLE	F	endometrium	carcinoma	adenocarcinoma	0.159311	0
KYM1_SOFT_TISSUE	KYM-1	unknown	soft_tissue	rhabdomyosarcoma	NS	0.445548	0
KG1_HAEMATOPOIETIC_AND_LYMPHOID_TISSUE	KG-1	M	haematopoietic_and_lymphoid_tissue	haematopoietic_neoplasm	acute_myeloid_leukaemia	0.358512	0
MDAPCA2B_PROSTATE	MDA PCa 2b	M	prostate	carcinoma	adenocarcinoma	0.0894618	0
LNCAPCLONEFGC_PROSTATE	LNCaP clone FGC	M	prostate	carcinoma	adenocarcinoma	2.64966	0
KYO1_HAEMATOPOIETIC_AND_LYMPHOID_TISSUE	KYO-1	M	haematopoietic_and_lymphoid_tissue	haematopoietic_neoplasm	blast_phase_chronic_myeloid_leukaemia	0.161625	0
KMRC3_KIDNEY	KMRC-3	unknown	kidney	carcinoma	clear_cell_renal_cell_carcinoma	43.9376	0
KASUMI6_HAEMATOPOIETIC_AND_LYMPHOID_TISSUE	Kasumi-6	M	haematopoietic_and_lymphoid_tissue	haematopoietic_neoplasm	acute_myeloid_leukaemia	0.144083	0
LMSU_STOMACH	LMSU	unknown	stomach	carcinoma	adenocarcinoma	4.77263	0
KCL22_HAEMATOPOIETIC_AND_LYMPHOID_TISSUE	KCL-22	F	haematopoietic_and_lymphoid_tissue	haematopoietic_neoplasm	blast_phase_chronic_myeloid_leukaemia	0.199232	0
KYSE140_OESOPHAGUS	KYSE-140	M	oesophagus	carcinoma	squamous_cell_carcinoma	0.164711	0
KYSE520_OESOPHAGUS	KYSE-520	F	oesophagus	carcinoma	squamous_cell_carcinoma	0.291406	0
KU812_HAEMATOPOIETIC_AND_LYMPHOID_TISSUE	KU812	M	haematopoietic_and_lymphoid_tissue	haematopoietic_neoplasm	chronic_myeloid_leukaemia	0.106094	0
JHUEM3_ENDOMETRIUM	JHUEM-3	unknown	endometrium	carcinoma	adenocarcinoma	8.43356	0
KMBC2_URINARY_TRACT	KMBC-2	unknown	urinary_tract	carcinoma	NS	2.55786	0
MALME3M_SKIN	Malme-3M	M	skin	malignant_melanoma	NS	1.35206	0
MDAMB468_BREAST	MDA-MB-468	F	breast	carcinoma	NS	1.09111	0
KYSE70_OESOPHAGUS	KYSE-70	M	oesophagus	carcinoma	squamous_cell_carcinoma	4.52912	0
LN18_CENTRAL_NERVOUS_SYSTEM	LN-18	M	central_nervous_system	glioma	astrocytoma_Grade_IV	3.67803	0
MG63_BONE	MG-63	M	bone	osteosarcoma	NS	0.0344019	0
LUDLU1_LUNG	LUDLU-1	M	lung	carcinoma	squamous_cell_carcinoma	0.0956686	0
JURKAT_HAEMATOPOIETIC_AND_LYMPHOID_TISSUE	JURKAT	M	haematopoietic_and_lymphoid_tissue	lymphoid_neoplasm	acute_lymphoblastic_T_cell_leukaemia	1.22114	0
JHUEM7_ENDOMETRIUM	JHUEM-7	F	endometrium	carcinoma	adenocarcinoma	2.6016	0
MUTZ5_HAEMATOPOIETIC_AND_LYMPHOID_TISSUE	MUTZ-5	M	haematopoietic_and_lymphoid_tissue	lymphoid_neoplasm	acute_lymphoblastic_B_cell_leukaemia	0.301939	0
NCIH810_LUNG	NCI-H810	M	lung	carcinoma	large_cell_carcinoma	0.110746	0
OVTOKO_OVARY	OVTOKO	F	ovary	carcinoma	clear_cell_carcinoma	0.187613	0
NCIH1781_LUNG	NCI-H1781	F	lung	carcinoma	bronchioloalveolar_adenocarcinoma	3.33948	0
NCIH1755_LUNG	NCI-H1755	F	lung	carcinoma	adenocarcinoma	1.8348	0
ML1_THYROID	ML-1	F	thyroid	carcinoma	follicular_carcinoma	1.48293	0
MOLM6_HAEMATOPOIETIC_AND_LYMPHOID_TISSUE	MOLM-6	M	haematopoietic_and_lymphoid_tissue	haematopoietic_neoplasm	blast_phase_chronic_myeloid_leukaemia	0.112793	0
MHHCALL2_HAEMATOPOIETIC_AND_LYMPHOID_TISSUE	MHH-CALL-2	F	haematopoietic_and_lymphoid_tissue	lymphoid_neoplasm	acute_lymphoblastic_B_cell_leukaemia	0.312428	0
MHHNB11_AUTONOMIC_GANGLIA	MHH-NB-11	M	autonomic_ganglia	neuroblastoma	NS	0.01111	0
PANC0203_PANCREAS	Panc 02.03	F	pancreas	carcinoma	NS	3.36132	0
NCIH2172_LUNG	NCI-H2172	F	lung	carcinoma	non_small_cell_carcinoma	0.205501	0
NCIH1693_LUNG	NCI-H1693	F	lung	carcinoma	adenocarcinoma	3.05271	0
PANC0504_PANCREAS	Panc 05.04	F	pancreas	carcinoma	NS	5.52252	0
NALM1_HAEMATOPOIETIC_AND_LYMPHOID_TISSUE	NALM-1	F	haematopoietic_and_lymphoid_tissue	haematopoietic_neoplasm	blast_phase_chronic_myeloid_leukaemia	0.192419	0
PANC0213_PANCREAS	Panc 02.13	F	pancreas	carcinoma	NS	20.5677	0
MKN1_STOMACH	MKN1	M	stomach	carcinoma	mixed_adenosquamous_carcinoma	0.0996177	0
OUMS23_LARGE_INTESTINE	OUMS-23	unknown	large_intestine	carcinoma	adenocarcinoma	0.0661648	0
NCO2_HAEMATOPOIETIC_AND_LYMPHOID_TISSUE	NCO2	F	haematopoietic_and_lymphoid_tissue	haematopoietic_neoplasm	chronic_myeloid_leukaemia	0.0401909	0
MINO_HAEMATOPOIETIC_AND_LYMPHOID_TISSUE	Mino	M	haematopoietic_and_lymphoid_tissue	lymphoid_neoplasm	mantle_cell_lymphoma	0.338992	0
NCIH1573_LUNG	NCI-H1573	F	lung	carcinoma	adenocarcinoma	0.290451	0
MPP89_PLEURA	MPP 89	M	pleura	mesothelioma	NS	6.94312	0
NCIH1563_LUNG	NCI-H1563	M	lung	carcinoma	adenocarcinoma	0.597509	0
NCIH2291_LUNG	NCI-H2291	M	lung	carcinoma	adenocarcinoma	23.3981	0
PANC1_PANCREAS	PANC-1	unknown	pancreas	carcinoma	ductal_carcinoma	0.0300897	0
NCIH1944_LUNG	NCI-H1944	F	lung	carcinoma	non_small_cell_carcinoma	0.363225	0
P12ICHIKAWA_HAEMATOPOIETIC_AND_LYMPHOID_TISSUE	P12-ICHIKAWA	M	haematopoietic_and_lymphoid_tissue	lymphoid_neoplasm	acute_lymphoblastic_T_cell_leukaemia	0.268226	0
OAW28_OVARY	OAW28	F	ovary	carcinoma	NS	0.147954	0
NCIH28_PLEURA	NCI-H28	M	pleura	mesothelioma	NS	0.141381	0
MHHCALL3_HAEMATOPOIETIC_AND_LYMPHOID_TISSUE	MHH-CALL-3	F	haematopoietic_and_lymphoid_tissue	lymphoid_neoplasm	acute_lymphoblastic_B_cell_leukaemia	0.18665	0
NCIH2228_LUNG	NCI-H2228	F	lung	carcinoma	adenocarcinoma	8.42827	0
MUTZ3_HAEMATOPOIETIC_AND_LYMPHOID_TISSUE	MUTZ-3	M	haematopoietic_and_lymphoid_tissue	haematopoietic_neoplasm	acute_myeloid_leukaemia	0.0797811	0
						0.179401	0
HS698T_LARGE_INTESTINE	Hs 698.T	M	large_intestine	carcinoma	adenocarcinoma	0.660279	0
HS600T_SKIN	Hs 600.T	unknown	skin	malignant_melanoma	NS	0.513555	0
HLFA_LUNG	HLF-a	F	lung	carcinoma	squamous_cell_carcinoma	8.01811	0
HPBALL_HAEMATOPOIETIC_AND_LYMPHOID_TISSUE	HPB-ALL	M	haematopoietic_and_lymphoid_tissue	lymphoid_neoplasm	acute_lymphoblastic_T_cell_leukaemia	0.0719555	0
HS729_SOFT_TISSUE	Hs 729	M	soft_tissue	rhabdomyosarcoma	NS	1.17853	0
HEC108_ENDOMETRIUM	HEC-108	F	endometrium	carcinoma	adenocarcinoma	0.906775	0
HUTU80_SMALL_INTESTINE	HuTu 80	unknown	small_intestine	carcinoma	adenocarcinoma	0.0429265	0
JEKO1_HAEMATOPOIETIC_AND_LYMPHOID_TISSUE	JeKo-1	F	haematopoietic_and_lymphoid_tissue	lymphoid_neoplasm	mantle_cell_lymphoma	0.0961858	0
						13.8359	0
HUH7_LIVER	HuH-7	M	liver	carcinoma	hepatocellular_carcinoma	0.135522	0
HS611T_HAEMATOPOIETIC_AND_LYMPHOID_TISSUE	Hs 611.T	F	haematopoietic_and_lymphoid_tissue	lymphoid_neoplasm	Hodgkin_lymphoma	8.85191	0
JHH2_LIVER	JHH-2	M	liver	carcinoma	hepatocellular_carcinoma	3.4713	0
HUT78_HAEMATOPOIETIC_AND_LYMPHOID_TISSUE	HuT 78	M	haematopoietic_and_lymphoid_tissue	lymphoid_neoplasm	mycosis_fungoides-Sezary_syndrome	0.293794	0
JHH4_LIVER	JHH-4	M	liver	carcinoma	hepatocellular_carcinoma	3.06411	0
HEC50B_ENDOMETRIUM	HEC-50B	F	endometrium	carcinoma	adenocarcinoma	0.214855	0
HS834T_SKIN	Hs 834.T	F	skin	malignant_melanoma	NS	0.234157	0
HS852T_SKIN	Hs 852.T	M	skin	malignant_melanoma	NS	0.227816	0
HS819T_BONE	Hs 819.T	M	bone	chondrosarcoma	NS	0.556055	0
HDQP1_BREAST	HDQ-P1	F	breast	carcinoma	ductal_carcinoma	1.42931	0
HS739T_BREAST	Hs 739.T	F	breast	carcinoma	NS	3.92164	0
KASUMI1_HAEMATOPOIETIC_AND_LYMPHOID_TISSUE	KASUMI-1	M	haematopoietic_and_lymphoid_tissue	haematopoietic_neoplasm	acute_myeloid_leukaemia	0.0457576	0
TOLEDO_HAEMATOPOIETIC_AND_LYMPHOID_TISSUE	Toledo	F	haematopoietic_and_lymphoid_tissue	lymphoid_neoplasm	diffuse_large_B_cell_lymphoma	0.175182	0
SUDHL8_HAEMATOPOIETIC_AND_LYMPHOID_TISSUE	SU-DHL-8	M	haematopoietic_and_lymphoid_tissue	lymphoid_neoplasm	diffuse_large_B_cell_lymphoma	0.400746	0
YAPC_PANCREAS	YAPC	M	pancreas	carcinoma	NS	2.8224	0
TUHR14TKB_KIDNEY	TUHR14TKB	unknown	kidney	carcinoma	NS	0.344358	0
TE8_OESOPHAGUS	TE-8	unknown	oesophagus	carcinoma	squamous_cell_carcinoma	1.89586	0
SW1088_CENTRAL_NERVOUS_SYSTEM	SW 1088	M	central_nervous_system	glioma	NS	1.39806	0
SNU869_BILIARY_TRACT	SNU-869	unknown	biliary_tract	carcinoma	NS	2.56766	0
TE159T_SOFT_TISSUE	TE 159.T	M	soft_tissue	rhabdomyosarcoma	NS	0.542429	0
KARPAS620_HAEMATOPOIETIC_AND_LYMPHOID_TISSUE	KARPAS-620	F	haematopoietic_and_lymphoid_tissue	lymphoid_neoplasm	plasma_cell_myeloma	0.143626	0
WSUDLCL2_HAEMATOPOIETIC_AND_LYMPHOID_TISSUE	WSU-DLCL2	M	haematopoietic_and_lymphoid_tissue	lymphoid_neoplasm	diffuse_large_B_cell_lymphoma	0.0866529	0
TM31_CENTRAL_NERVOUS_SYSTEM	TM-31	unknown	central_nervous_system	glioma	astrocytoma	12.4325	0
T173_BONE	T1-73	unknown	bone	osteosarcoma	NS	0.478281	0
TUHR10TKB_KIDNEY	TUHR10TKB	unknown	kidney	carcinoma	NS	7.61454	0
VMRCRCZ_KIDNEY	VMRC-RCZ	unknown	kidney	carcinoma	renal_cell_carcinoma	1.50665	0
JM1_HAEMATOPOIETIC_AND_LYMPHOID_TISSUE	JM1	unknown	haematopoietic_and_lymphoid_tissue	lymphoid_neoplasm	B_cell_lymphoma_unspecified	0.046808	0
YD10B_UPPER_AERODIGESTIVE_TRACT	YD-10B	M	upper_aerodigestive_tract	carcinoma	squamous_cell_carcinoma	6.18344	0
TE125T_SOFT_TISSUE	TE 125.T	F	soft_tissue	rhabdomyosarcoma	NS	0.517636	0
WM88_SKIN	WM-88	unknown	skin	malignant_melanoma	NS	0.102963	0
SNUC4_LARGE_INTESTINE	SNU-C4	M	large_intestine	carcinoma	adenocarcinoma	0.416641	0
TE6_OESOPHAGUS	TE-6	unknown	oesophagus	carcinoma	squamous_cell_carcinoma	2.00236	0
SR786_HAEMATOPOIETIC_AND_LYMPHOID_TISSUE	SR-786	M	haematopoietic_and_lymphoid_tissue	lymphoid_neoplasm	anaplastic_large_cell_lymphoma	6.70444	0
CORL47_LUNG	COR-L47	M	lung	carcinoma	small_cell_carcinoma	0.33759	0
TE617T_SOFT_TISSUE	TE 617.T	F	soft_tissue	rhabdomyosarcoma	NS	0.0813404	0
TF1_HAEMATOPOIETIC_AND_LYMPHOID_TISSUE	TF-1	M	haematopoietic_and_lymphoid_tissue	haematopoietic_neoplasm	acute_myeloid_leukaemia	0.224019	0
SW837_LARGE_INTESTINE	SW837	M	large_intestine	carcinoma	adenocarcinoma	2.25334	0
TE14_OESOPHAGUS	TE-14	unknown	oesophagus	carcinoma	squamous_cell_carcinoma	0.367753	0
UBLC1_URINARY_TRACT	U-BLC1	F	urinary_tract	carcinoma	transitional_cell_carcinoma	34.8924	0
NCIH441_LUNG	NCI-H441	M	lung	carcinoma	adenocarcinoma	18.1344	0
TUHR4TKB_KIDNEY	TUHR4TKB	unknown	kidney	carcinoma	NS	9.02814	0
YD8_UPPER_AERODIGESTIVE_TRACT	YD-8	F	upper_aerodigestive_tract	carcinoma	squamous_cell_carcinoma	2.31358	0
VMRCRCW_KIDNEY	VMRC-RCW	M	kidney	carcinoma	NS	2.50029	0
SW780_URINARY_TRACT	SW 780	F	urinary_tract	carcinoma	transitional_cell_carcinoma	1.34268	0
SUDHL4_HAEMATOPOIETIC_AND_LYMPHOID_TISSUE	SU-DHL-4	M	haematopoietic_and_lymphoid_tissue	lymphoid_neoplasm	diffuse_large_B_cell_lymphoma	0.11367	0
UMUC1_URINARY_TRACT	UM-UC-1	M	urinary_tract	carcinoma	transitional_cell_carcinoma	1.6747	0
EFO21_OVARY	EFO-21	F	ovary	carcinoma	serous_carcinoma	0.786539	0
CAL78_BONE	CAL-78	M	bone	chondrosarcoma	dedifferentiated	1.19366	0
YH13_CENTRAL_NERVOUS_SYSTEM	YH-13	M	central_nervous_system	glioma	astrocytoma_Grade_IV	2.23387	0
TGBC11TKB_STOMACH	TGBC11TKB	unknown	stomach	carcinoma	NS	0.741352	0
TT2609C02_THYROID	TT2609-C02	M	thyroid	carcinoma	follicular_carcinoma	0.818537	0
SW403_LARGE_INTESTINE	SW403	F	large_intestine	carcinoma	adenocarcinoma	0.130866	0
UACC812_BREAST	UACC-812	F	breast	carcinoma	ductal_carcinoma	0.181347	0
SW1116_LARGE_INTESTINE	SW1116	M	large_intestine	carcinoma	adenocarcinoma	0.100914	0
ST486_HAEMATOPOIETIC_AND_LYMPHOID_TISSUE	ST486	F	haematopoietic_and_lymphoid_tissue	lymphoid_neoplasm	Burkitt_lymphoma	0.240121	0
SNU886_LIVER	SNU-886	M	liver	carcinoma	hepatocellular_carcinoma	1.2507	0
SNU81_LARGE_INTESTINE	SNU-81	M	large_intestine	carcinoma	NS	1.72567	0
WM983B_SKIN	WM-983B	unknown	skin	malignant_melanoma	NS	0.40086	0
U118MG_CENTRAL_NERVOUS_SYSTEM	U-118 MG	M	central_nervous_system	glioma	astrocytoma	2.39099	0
YD15_SALIVARY_GLAND	YD-15	M	salivary_gland	carcinoma	mucoepidermoid_carcinoma	2.32473	0
SUDHL5_HAEMATOPOIETIC_AND_LYMPHOID_TISSUE	SU-DHL-5	F	haematopoietic_and_lymphoid_tissue	lymphoid_neoplasm	diffuse_large_B_cell_lymphoma	0.398722	0
TE4_OESOPHAGUS	TE-4	unknown	oesophagus	carcinoma	squamous_cell_carcinoma	1.80319	0
SNU878_LIVER	SNU-878	F	liver	carcinoma	hepatocellular_carcinoma	1.59613	0
SNU407_LARGE_INTESTINE	SNU-407	M	large_intestine	carcinoma	NS	0.109588	0
GSU_STOMACH	GSU	unknown	stomach	carcinoma	adenocarcinoma	0.0893785	0
GSS_STOMACH	GSS	unknown	stomach	carcinoma	adenocarcinoma	0.585915	0
OVISE_OVARY	OVISE	F	ovary	carcinoma	clear_cell_carcinoma	0.463522	0
IPC298_SKIN	IPC-298	F	skin	malignant_melanoma	NS	0.257324	0
NCIH446_LUNG	NCI-H446	M	lung	carcinoma	small_cell_carcinoma	0.0271241	0
CCK81_LARGE_INTESTINE	CCK-81	unknown	large_intestine	carcinoma	adenocarcinoma	0.143087	0
PSN1_PANCREAS	PSN1	unknown	pancreas	carcinoma	ductal_carcinoma	2.28167	0
MOLM13_HAEMATOPOIETIC_AND_LYMPHOID_TISSUE	MOLM-13	M	haematopoietic_and_lymphoid_tissue	haematopoietic_neoplasm	acute_myeloid_leukaemia	0.00134583	0
U251MG_CENTRAL_NERVOUS_SYSTEM	U-251 MG	M	central_nervous_system	glioma	astrocytoma	4.80022	0
MORCPR_LUNG	MOR/CPR	unknown	lung	carcinoma	adenocarcinoma	0.0956792	0
TE5_OESOPHAGUS	TE-5	unknown	oesophagus	carcinoma	squamous_cell_carcinoma	0.341054	0
8MGBA_CENTRAL_NERVOUS_SYSTEM	8-MG-BA	F	central_nervous_system	glioma	astrocytoma_Grade_IV	3.52277	0
IALM_LUNG	IA-LM	M	lung	carcinoma	large_cell_carcinoma	8.51815	0
EB1_HAEMATOPOIETIC_AND_LYMPHOID_TISSUE	EB1	F	haematopoietic_and_lymphoid_tissue	lymphoid_neoplasm	Burkitt_lymphoma	0.22181	0
GCIY_STOMACH	GCIY	F	stomach	carcinoma	adenocarcinoma	0.0608841	0
NUGC4_STOMACH	NUGC-4	unknown	stomach	carcinoma	signet_ring_adenocarcinoma	0.263117	0
MEG01_HAEMATOPOIETIC_AND_LYMPHOID_TISSUE	MEG-01	M	haematopoietic_and_lymphoid_tissue	haematopoietic_neoplasm	blast_phase_chronic_myeloid_leukaemia	0.0855205	0
TT_THYROID	TT	F	thyroid	carcinoma	medullary_carcinoma	0.0124918	0
T47D_BREAST	T-47D	F	breast	carcinoma	ductal_carcinoma	0.0714931	0
HCC1419_BREAST	HCC1419	F	breast	carcinoma	ductal_carcinoma	0.0968526	0
HT55_LARGE_INTESTINE	HT55	unknown	large_intestine	carcinoma	adenocarcinoma	0.13276	0
CORL311_LUNG	COR-L311	M	lung	carcinoma	small_cell_carcinoma	0.0200107	0
HCC33_LUNG	HCC-33	M	lung	carcinoma	small_cell_carcinoma	0.0946181	0
CORL279_LUNG	COR-L279	M	lung	carcinoma	small_cell_carcinoma	0.526297	0
JHOS2_OVARY	JHOS-2	F	ovary	carcinoma	adenocarcinoma	0.796036	0
CORL88_LUNG	COR-L88	M	lung	carcinoma	small_cell_carcinoma	0.375066	0
COLO668_LUNG	COLO 668	F	lung	carcinoma	small_cell_carcinoma	0.544466	0
HCC1143_BREAST	HCC1143	F	breast	carcinoma	ductal_carcinoma	0.471126	0
DMS114_LUNG	DMS 114	M	lung	carcinoma	small_cell_carcinoma	0.054189	0
HCC15_LUNG	HCC-15	M	lung	carcinoma	squamous_cell_carcinoma	1.35614	0
HARA_LUNG	HARA	M	lung	carcinoma	squamous_cell_carcinoma	0.439435	0
MKN74_STOMACH	MKN74	M	stomach	carcinoma	tubular_adenocarcinoma	13.0877	0
NCIH2052_PLEURA	NCI-H2052	M	pleura	mesothelioma	NS	14.5243	0
NCIH2286_LUNG	NCI-H2286	F	lung	carcinoma	small_cell_carcinoma	6.31259	0
NCIH1694_LUNG	NCI-H1694	M	lung	carcinoma	small_cell_carcinoma	0.19588	0
NCIH1184_LUNG	NCI-H1184	M	lung	carcinoma	small_cell_carcinoma	0.139965	0
NCIH1963_LUNG	NCI-H1963	M	lung	carcinoma	small_cell_carcinoma	0.46135	0
NCIH661_LUNG	NCI-H661	M	lung	carcinoma	large_cell_carcinoma	0.0900725	0
NCIH2227_LUNG	NCI-H2227	M	lung	carcinoma	small_cell_carcinoma	0.110652	0
NCIH82_LUNG	NCI-H82	M	lung	carcinoma	small_cell_carcinoma	0.40602	0
NCIH747_LARGE_INTESTINE	NCI-H747	M	large_intestine	carcinoma	adenocarcinoma	6.15051	0
NCIH2171_LUNG	NCI-H2171	M	lung	carcinoma	small_cell_carcinoma	0.0535677	0
NCIH1436_LUNG	NCI-H1436	M	lung	carcinoma	small_cell_carcinoma	1.17487	0
NCIH209_LUNG	NCI-H209	M	lung	carcinoma	small_cell_carcinoma	0.591547	0
NCIH2029_LUNG	NCI-H2029	F	lung	carcinoma	small_cell_carcinoma	0.665365	0
NCIH1876_LUNG	NCI-H1876	M	lung	carcinoma	small_cell_carcinoma	0.535405	0
NCIH1105_LUNG	NCI-H1105	M	lung	carcinoma	small_cell_carcinoma	0.802866	0
NCIH211_LUNG	NCI-H211	F	lung	carcinoma	small_cell_carcinoma	0.105238	0
K562_HAEMATOPOIETIC_AND_LYMPHOID_TISSUE	K-562	F	haematopoietic_and_lymphoid_tissue	haematopoietic_neoplasm	blast_phase_chronic_myeloid_leukaemia	0.0502632	0
NCIH196_LUNG	NCI-H196	M	lung	carcinoma	small_cell_carcinoma	0.273121	0
GB1_CENTRAL_NERVOUS_SYSTEM	GB-1	M	central_nervous_system	glioma	astrocytoma_Grade_IV	15.7389	0
NCIH660_PROSTATE	NCI-H660	M	prostate	carcinoma	small_cell_carcinoma	1.39182	0
LAMA84_HAEMATOPOIETIC_AND_LYMPHOID_TISSUE	LAMA-84	F	haematopoietic_and_lymphoid_tissue	haematopoietic_neoplasm	blast_phase_chronic_myeloid_leukaemia	1.47068	0
C32_SKIN	C32	M	skin	malignant_melanoma	NS	0.115306	0
MONOMAC1_HAEMATOPOIETIC_AND_LYMPHOID_TISSUE	MONO-MAC-1	M	haematopoietic_and_lymphoid_tissue	haematopoietic_neoplasm	acute_myeloid_leukaemia	0.00134886	0
CFPAC1_PANCREAS	CFPAC-1	M	pancreas	carcinoma	ductal_carcinoma	4.3016	0
OAW42_OVARY	OAW42	F	ovary	carcinoma	NS	0.0527278	0
HPAC_PANCREAS	HPAC	F	pancreas	carcinoma	ductal_carcinoma	0.644519	0
KM12_LARGE_INTESTINE	KM12	unknown	large_intestine	carcinoma	adenocarcinoma	0.296568	0
MONOMAC6_HAEMATOPOIETIC_AND_LYMPHOID_TISSUE	MONO-MAC-6	M	haematopoietic_and_lymphoid_tissue	haematopoietic_neoplasm	acute_myeloid_leukaemia	0.0506262	0
NCIH508_LARGE_INTESTINE	NCI-H508	M	large_intestine	carcinoma	adenocarcinoma	0.0945882	0
KMS20_HAEMATOPOIETIC_AND_LYMPHOID_TISSUE	KMS-20	F	haematopoietic_and_lymphoid_tissue	lymphoid_neoplasm	plasma_cell_myeloma	0.164327	0
KP2_PANCREAS	KP-2	F	pancreas	carcinoma	NS	1.42407	0
HLF_LIVER	HLF	M	liver	carcinoma	hepatocellular_carcinoma	4.74504	0
JHOS4_OVARY	JHOS-4	F	ovary	carcinoma	adenocarcinoma	0.119723	0
NIHOVCAR3_OVARY	NIH:OVCAR-3	F	ovary	carcinoma	NS	0.195719	0
697_HAEMATOPOIETIC_AND_LYMPHOID_TISSUE	697	M	haematopoietic_and_lymphoid_tissue	lymphoid_neoplasm	acute_lymphoblastic_B_cell_leukaemia	0.378493	0
EFM19_BREAST	EFM-19	F	breast	carcinoma	ductal_carcinoma	0.0234879	0
CAS1_CENTRAL_NERVOUS_SYSTEM	CAS-1	M	central_nervous_system	glioma	astrocytoma_Grade_IV	1.31822	0
HCC1187_BREAST	HCC1187	F	breast	carcinoma	ductal_carcinoma	0.144995	0
NCIH716_LARGE_INTESTINE	NCI-H716	unknown	large_intestine	carcinoma	adenocarcinoma	0.0705796	0
OCIAML2_HAEMATOPOIETIC_AND_LYMPHOID_TISSUE	OCI-AML2	M	haematopoietic_and_lymphoid_tissue	haematopoietic_neoplasm	acute_myeloid_leukaemia	0.0712441	0
F36P_HAEMATOPOIETIC_AND_LYMPHOID_TISSUE	F-36P	M	haematopoietic_and_lymphoid_tissue	haematopoietic_neoplasm	acute_myeloid_leukaemia	6.34684	0
GP2D_LARGE_INTESTINE	GP2d	F	large_intestine	carcinoma	adenocarcinoma	0.198105	0
KMS26_HAEMATOPOIETIC_AND_LYMPHOID_TISSUE	KMS-26	M	haematopoietic_and_lymphoid_tissue	lymphoid_neoplasm	plasma_cell_myeloma	0.0647637	0
KURAMOCHI_OVARY	KURAMOCHI	F	ovary	carcinoma	undifferentiated_carcinoma	0.231519	0
SKMM2_HAEMATOPOIETIC_AND_LYMPHOID_TISSUE	SK-MM-2	M	haematopoietic_and_lymphoid_tissue	lymphoid_neoplasm	plasma_cell_myeloma	0.453457	0
SNU387_LIVER	SNU-387	F	liver	carcinoma	hepatocellular_carcinoma	8.46687	0
A704_KIDNEY	A-704	M	kidney	carcinoma	renal_cell_carcinoma	0.45239	0
SKOV3_OVARY	SK-OV-3	F	ovary	carcinoma	adenocarcinoma	0.578491	0
TCCSUP_URINARY_TRACT	TCCSUP	F	urinary_tract	carcinoma	transitional_cell_carcinoma	11.4571	0
OV7_OVARY	OV7	F	ovary	carcinoma	NS	0.893903	0
RERFGC1B_STOMACH	RERF-GC-1B	M	stomach	carcinoma	NS	0.11616	0
SW1271_LUNG	SW 1271	M	lung	carcinoma	small_cell_carcinoma	0.18858	0
SJSA1_BONE	SJSA-1	M	bone	osteosarcoma	NS	4.86228	0
RMGI_OVARY	RMG-I	F	ovary	carcinoma	clear_cell_carcinoma	0.139759	0
RMUGS_OVARY	RMUG-S	F	ovary	carcinoma	adenocarcinoma	0.428433	0
SEM_HAEMATOPOIETIC_AND_LYMPHOID_TISSUE	SEM	F	haematopoietic_and_lymphoid_tissue	lymphoid_neoplasm	acute_lymphoblastic_B_cell_leukaemia	0.0818382	0
OCIAML3_HAEMATOPOIETIC_AND_LYMPHOID_TISSUE	OCI-AML3	M	haematopoietic_and_lymphoid_tissue	haematopoietic_neoplasm	acute_myeloid_leukaemia	0.00879919	0
SCLC21H_LUNG	SCLC-21H	M	lung	carcinoma	small_cell_carcinoma	0.0335637	0
A4FUK_HAEMATOPOIETIC_AND_LYMPHOID_TISSUE	A4/Fuk	F	haematopoietic_and_lymphoid_tissue	lymphoid_neoplasm	diffuse_large_B_cell_lymphoma	0.671889	0
THP1_HAEMATOPOIETIC_AND_LYMPHOID_TISSUE	THP-1	M	haematopoietic_and_lymphoid_tissue	haematopoietic_neoplasm	acute_myeloid_leukaemia	0.189286	0
59M_OVARY	59M	F	ovary	carcinoma	NS	1.64212	0
REH_HAEMATOPOIETIC_AND_LYMPHOID_TISSUE	Reh	unknown	haematopoietic_and_lymphoid_tissue	lymphoid_neoplasm	acute_lymphoblastic_B_cell_leukaemia	0.134736	0
T98G_CENTRAL_NERVOUS_SYSTEM	T98G	M	central_nervous_system	glioma	astrocytoma_Grade_IV	0.511467	0
SHP77_LUNG	SHP-77	M	lung	carcinoma	small_cell_carcinoma	0.377923	0
